# Supplementary material for: Intermediate filaments promote glioblastoma cell invasion by controlling cell deformability and mechanosensitive gene expression
Source: Research Square preprint supplement (doi:10.21203/rs.3.rs-2828066/v1), 2023-06-29
Supplement: Supplementary file 1 [file 2a361ce38b7a974ec40071d8.xlsx]

## Sheet: Supp Table 1
IF signature	# cells (total = 8560)	FC gene / adj. p-value	IF gene expression score
SYNM / GFAP / VIM 10	185	SYNM: 1.8 / 0	8.1
		GFAP: 1.65 / 2.04e-102
		VIM: 0.63 / 1.14e-21
		[NES: -1.14 / 5.68e-06]
SYNM / NES / VIM 3	175	SYNM: 1.6 / 0	6.8
		NES: 1.1 / 1.2e-124
		VIM: 0.32 / 3.34e-13
		[GFAP: -2.5 / 3.34e-09]
VIM / GFAP 1	662	GFAP: 0.84 / 0	6.3
		VIM: 1.15 / 2.7e-227
		[NES: -1.18 / 5.96e-39]
GFAP / NES 4	61	GFAP: 1.8 / 1.2e-47	6.1
		NES: 1.4 / 1.5e-47
		[VIM: -2.8 / 3.8e-11]
GFAP / VIM 7	763	GFAP: 2.23 / 0	6.1
		VIM: ns
		[NES: -1.2 / 6.1e-46]
NES / VIM 11	1063	NES: 1.8 / 0	5.2
		VIM: 0.4 / 5.31e-114
		[GFAP: -2.6 / 1.54e-79]
VIM / SYNM 5	25	SYNM: 1.01 / 2.53e-105	5.1
		VIM: 1.27 / 4.57e-08
VIM 8	2010	VIM: 0.89 / 0	3.2
		[GFAP: -2.7 / 3.6e-175
		NES: -1.3 / 8.2e-150]
GFAP 6	434	GFAP: 1.33 / 4.31e-294	3
		[VIM: -2.9 / 1.25e-101
		NES: -1.16 / 8.88e-24]
NES 9	531	NES: 1.29 / 0	2.1
		[VIM: -2.9 / 1.82e-126
		GFAP: -2.5 / 1.27e-35]
SYNM 2	41	SYNM: 1.7 / 2.6e-184	1.7
		[VIM: -2.8 / 1.9e-06]
negative 12	2644	VIM: -3.15 / 0	0
		NES: -1.4 / 2.5e-219
		GFAP: -2.8 / 3.06e-256
		SYNM: ns
