# Supplementary material for: Intermediate filaments promote glioblastoma cell invasion by controlling cell deformability and mechanosensitive gene expression
Source: Research Square preprint supplement (doi:10.21203/rs.3.rs-2828066/v1), 2023-06-29
Supplement: Supplementary file 2 [file 3e41efc8b27dbd360c6c50f0.xlsx]

## Sheet: Supp Table 2
gene_name	p_val	avg_logFC	pct.1	pct.2	p_val_adj	cluster
GFAP	0	0.844109	1	0.178	0	1 VIM/GFAP
VIM	7.29747e-232	1.15053	1	0.53	2.71955e-227	1 VIM/GFAP
CLU	1.33697e-111	1.14929	0.894	0.54	4.98249e-107	1 VIM/GFAP
CD44	1.77356e-98	1.12469	0.301	0.067	6.60953e-94	1 VIM/GFAP
CHI3L1	9.78262e-82	1.40166	0.455	0.167	3.64569e-77	1 VIM/GFAP
CHI3L2	1.69574e-73	1.38075	0.163	0.026	6.31953e-69	1 VIM/GFAP
C3	3.60421e-70	1.09282	0.171	0.03	1.34318e-65	1 VIM/GFAP
C1R	4.06102e-61	0.929683	0.258	0.074	1.51342e-56	1 VIM/GFAP
S100A10	4.11429e-61	0.999562	0.322	0.107	1.53327e-56	1 VIM/GFAP
SAA1	1.38543e-58	1.4909	0.128	0.02	5.1631e-54	1 VIM/GFAP
C1S	1.35451e-54	0.913026	0.198	0.05	5.04786e-50	1 VIM/GFAP
SOD2	1.0319e-53	1.48631	0.394	0.173	3.84557e-49	1 VIM/GFAP
SPOCD1	1.48476e-53	0.561871	0.118	0.018	5.53327e-49	1 VIM/GFAP
EFEMP1	2.77431e-53	0.96579	0.292	0.1	1.0339e-48	1 VIM/GFAP
ANXA2	9.98995e-50	0.704871	0.334	0.128	3.72296e-45	1 VIM/GFAP
SPARCL1	2.44217e-49	0.675194	0.705	0.445	9.10125e-45	1 VIM/GFAP
SPARC	8.16838e-49	0.545599	0.752	0.471	3.04411e-44	1 VIM/GFAP
SERPING1	9.36783e-49	0.823777	0.199	0.054	3.49111e-44	1 VIM/GFAP
CRYAB	1.01095e-48	0.835116	0.715	0.451	3.76752e-44	1 VIM/GFAP
GJA1	2.39285e-47	0.544696	0.187	0.049	8.91742e-43	1 VIM/GFAP
ID3	6.24165e-47	0.724889	0.319	0.122	2.32608e-42	1 VIM/GFAP
NAMPT	1.84179e-46	1.1606	0.299	0.118	6.86378e-42	1 VIM/GFAP
MGST1	4.80975e-46	0.714605	0.196	0.055	1.79245e-41	1 VIM/GFAP
ANXA1	1.99332e-45	0.668014	0.221	0.067	7.4285e-41	1 VIM/GFAP
ELOA2	4.08528e-45	0.69095	0.101	0.016	1.52246e-40	1 VIM/GFAP
MT1X	1.13802e-44	0.630555	0.713	0.451	4.24106e-40	1 VIM/GFAP
MT2A	2.58174e-44	0.530365	0.896	0.645	9.62138e-40	1 VIM/GFAP
TCIM	6.26401e-44	0.727033	0.218	0.067	2.33441e-39	1 VIM/GFAP
GBP2	7.37967e-44	0.573742	0.106	0.018	2.75018e-39	1 VIM/GFAP
NES	1.60036e-43	-1.18932	0	0.232	5.96406e-39	1 VIM/GFAP
LTF	6.32925e-43	1.06413	0.103	0.017	2.35872e-38	1 VIM/GFAP
NNMT	1.54468e-42	0.844399	0.159	0.04	5.75656e-38	1 VIM/GFAP
GBP1	6.59954e-42	0.676098	0.15	0.036	2.45945e-37	1 VIM/GFAP
CEBPD	8.32614e-42	0.623267	0.444	0.22	3.1029e-37	1 VIM/GFAP
HLA-DRA	3.40787e-41	0.791953	0.154	0.039	1.27001e-36	1 VIM/GFAP
STMN1	1.22061e-40	-1.07104	0.361	0.562	4.54886e-36	1 VIM/GFAP
B2M	1.94256e-40	0.383608	0.944	0.768	7.23932e-36	1 VIM/GFAP
GADD45B	1.57253e-39	0.603896	0.317	0.131	5.86034e-35	1 VIM/GFAP
FOS	6.60443e-39	0.762612	0.718	0.493	2.46127e-34	1 VIM/GFAP
CCL2	8.19808e-39	0.842011	0.144	0.036	3.05518e-34	1 VIM/GFAP
TNC	8.73424e-39	0.768038	0.287	0.114	3.25499e-34	1 VIM/GFAP
S100A6	1.11739e-38	0.69908	0.704	0.473	4.16417e-34	1 VIM/GFAP
GLUL	3.56459e-38	0.829981	0.47	0.265	1.32842e-33	1 VIM/GFAP
A2M	8.29902e-37	0.838959	0.239	0.089	3.0928e-32	1 VIM/GFAP
APOE	1.03883e-36	0.544554	0.577	0.336	3.8714e-32	1 VIM/GFAP
CPE	1.54809e-36	0.535121	0.69	0.461	5.76927e-32	1 VIM/GFAP
JUNB	2.92271e-36	0.659563	0.375	0.181	1.08921e-31	1 VIM/GFAP
SAT1	8.55628e-36	0.890427	0.378	0.189	3.18867e-31	1 VIM/GFAP
LGALS3	2.1424e-35	0.512577	0.408	0.198	7.98408e-31	1 VIM/GFAP
CNN3	6.1091e-35	0.589593	0.624	0.418	2.27668e-30	1 VIM/GFAP
CST3	8.92257e-35	0.428411	0.858	0.66	3.32518e-30	1 VIM/GFAP
RDH10	1.23276e-34	0.562659	0.151	0.043	4.59412e-30	1 VIM/GFAP
TIMP1	3.46953e-34	0.614543	0.58	0.353	1.29299e-29	1 VIM/GFAP
EMP3	4.56091e-34	0.452402	0.192	0.064	1.69971e-29	1 VIM/GFAP
MT1G	6.17015e-34	0.67807	0.459	0.252	2.29943e-29	1 VIM/GFAP
PTMA	8.35102e-34	-0.678279	0.672	0.761	3.11218e-29	1 VIM/GFAP
H3F3A	6.11669e-33	-0.552553	0.627	0.753	2.27951e-28	1 VIM/GFAP
CD74	1.24026e-32	0.847129	0.168	0.053	4.62208e-28	1 VIM/GFAP
MT1E	2.02671e-32	0.607407	0.378	0.187	7.55295e-28	1 VIM/GFAP
AEBP1	3.02176e-32	0.687096	0.322	0.15	1.12612e-27	1 VIM/GFAP
F3	9.60698e-32	0.559622	0.292	0.128	3.58023e-27	1 VIM/GFAP
CCN1	1.3901e-31	0.874196	0.257	0.109	5.18049e-27	1 VIM/GFAP
HLA-B	1.51599e-31	0.388047	0.835	0.604	5.64963e-27	1 VIM/GFAP
CXCL14	2.38561e-31	0.67124	0.151	0.045	8.89045e-27	1 VIM/GFAP
AQP4	1.21784e-30	0.465524	0.405	0.207	4.53851e-26	1 VIM/GFAP
SLC2A3	1.71168e-30	0.509473	0.193	0.069	6.37891e-26	1 VIM/GFAP
HLA-DRB1	2.27939e-30	0.643049	0.104	0.025	8.49458e-26	1 VIM/GFAP
LGALS1	1.49807e-29	0.515258	0.511	0.305	5.58286e-25	1 VIM/GFAP
MAN1C1	2.11279e-29	0.433865	0.106	0.026	7.87375e-25	1 VIM/GFAP
S100A11	4.52647e-29	0.370579	0.153	0.048	1.68688e-24	1 VIM/GFAP
PDPN	4.8886e-29	0.566692	0.298	0.14	1.82183e-24	1 VIM/GFAP
TMSB15A	9.6603e-29	-0.911858	0.032	0.208	3.6001e-24	1 VIM/GFAP
HSPB1	5.65454e-28	0.335945	0.692	0.473	2.10728e-23	1 VIM/GFAP
MARCKSL1	6.13511e-28	-0.719223	0.388	0.545	2.28637e-23	1 VIM/GFAP
STMN2	8.83012e-28	-1.33982	0.018	0.184	3.29072e-23	1 VIM/GFAP
DUSP1	2.42057e-27	0.860923	0.261	0.12	9.02072e-23	1 VIM/GFAP
TIMP3	3.75288e-27	0.494161	0.323	0.159	1.39859e-22	1 VIM/GFAP
ATP1B2	4.31416e-27	0.436467	0.574	0.356	1.60776e-22	1 VIM/GFAP
SNX10	1.78869e-26	0.485979	0.142	0.046	6.66593e-22	1 VIM/GFAP
PTX3	2.01414e-26	0.785361	0.103	0.027	7.50609e-22	1 VIM/GFAP
B4GALNT1	2.05218e-26	-1.39774	0.056	0.229	7.64784e-22	1 VIM/GFAP
FOSB	3.12478e-26	0.663728	0.289	0.139	1.16451e-21	1 VIM/GFAP
TAGLN2	4.14085e-26	0.454383	0.369	0.195	1.54317e-21	1 VIM/GFAP
ID4	4.43023e-26	0.650757	0.269	0.125	1.65101e-21	1 VIM/GFAP
ZFP36L2	8.69498e-26	0.50207	0.462	0.277	3.24036e-21	1 VIM/GFAP
VAMP5	1.91845e-25	0.416704	0.207	0.084	7.14948e-21	1 VIM/GFAP
TNFRSF1A	2.22031e-25	0.403435	0.181	0.069	8.27442e-21	1 VIM/GFAP
ACTN1	2.94552e-25	0.645548	0.249	0.116	1.09771e-20	1 VIM/GFAP
TPP1	3.3012e-25	0.59813	0.234	0.103	1.23026e-20	1 VIM/GFAP
FN1	4.73181e-25	0.579828	0.205	0.085	1.7634e-20	1 VIM/GFAP
CD24	6.14524e-25	-0.81003	0.039	0.203	2.29015e-20	1 VIM/GFAP
IGFBP7	8.43304e-25	0.581154	0.346	0.186	3.14274e-20	1 VIM/GFAP
TNFRSF12A	8.82793e-25	0.41156	0.187	0.074	3.2899e-20	1 VIM/GFAP
SQSTM1	1.05018e-24	0.469613	0.397	0.23	3.91372e-20	1 VIM/GFAP
ZFP36L1	2.26877e-24	0.680769	0.399	0.232	8.45504e-20	1 VIM/GFAP
CSF1	2.76579e-24	0.480663	0.133	0.043	1.03073e-19	1 VIM/GFAP
HLA-E	3.02466e-23	0.38703	0.322	0.164	1.1272e-18	1 VIM/GFAP
HLA-A	3.24261e-23	0.30751	0.802	0.63	1.20842e-18	1 VIM/GFAP
MT1XP1	3.37955e-23	0.635371	0.397	0.235	1.25946e-18	1 VIM/GFAP
IFITM3	5.92569e-23	0.388229	0.536	0.343	2.20833e-18	1 VIM/GFAP
EMP1	6.81897e-23	0.505592	0.231	0.105	2.54123e-18	1 VIM/GFAP
ANXA2P2	7.31709e-23	0.287152	0.124	0.04	2.72686e-18	1 VIM/GFAP
SLC1A3	8.1873e-23	0.373431	0.45	0.265	3.05116e-18	1 VIM/GFAP
ATF3	1.59786e-22	0.591843	0.204	0.089	5.95473e-18	1 VIM/GFAP
TUBB	2.1624e-22	-0.689284	0.394	0.534	8.0586e-18	1 VIM/GFAP
FOSL2	3.40237e-22	0.382598	0.119	0.038	1.26796e-17	1 VIM/GFAP
NNAT	3.4292e-22	-0.955712	0.03	0.174	1.27796e-17	1 VIM/GFAP
CTSB	4.32945e-22	0.689489	0.382	0.231	1.61345e-17	1 VIM/GFAP
RPL15	5.34021e-22	-0.369387	0.766	0.816	1.99014e-17	1 VIM/GFAP
AGT	6.46554e-22	0.372785	0.394	0.223	2.40951e-17	1 VIM/GFAP
FAM20C	8.66023e-22	0.584399	0.204	0.091	3.22741e-17	1 VIM/GFAP
MT3	9.91112e-22	0.268196	0.86	0.646	3.69358e-17	1 VIM/GFAP
HLA-C	1.3817e-21	0.332934	0.705	0.524	5.14919e-17	1 VIM/GFAP
WWTR1	1.8086e-21	0.448145	0.163	0.064	6.74013e-17	1 VIM/GFAP
NSG2	2.36956e-21	-0.767508	0.002	0.124	8.83065e-17	1 VIM/GFAP
DLC1	2.4847e-21	0.417562	0.137	0.05	9.25973e-17	1 VIM/GFAP
FLNA	3.28006e-21	0.521507	0.263	0.132	1.22238e-16	1 VIM/GFAP
YBX1	3.73329e-21	-0.541814	0.55	0.643	1.39129e-16	1 VIM/GFAP
FAM107A	4.73879e-21	0.52424	0.144	0.053	1.76601e-16	1 VIM/GFAP
JPT1	5.41958e-21	-0.790278	0.239	0.395	2.01971e-16	1 VIM/GFAP
IFITM2	7.86005e-21	0.256056	0.151	0.057	2.9292e-16	1 VIM/GFAP
BASP1	8.57813e-21	-0.788853	0.047	0.191	3.19681e-16	1 VIM/GFAP
CDK4	9.57303e-21	-0.861672	0.29	0.455	3.56758e-16	1 VIM/GFAP
PLTP	1.03909e-20	0.394089	0.325	0.177	3.87237e-16	1 VIM/GFAP
HOPX	1.08236e-20	0.374289	0.426	0.25	4.03362e-16	1 VIM/GFAP
EGR1	1.2748e-20	0.484827	0.594	0.43	4.75079e-16	1 VIM/GFAP
JUN	1.39292e-20	0.469124	0.592	0.433	5.191e-16	1 VIM/GFAP
SMOC1	2.30986e-20	-0.867468	0.027	0.16	8.60816e-16	1 VIM/GFAP
TUBA1A	4.08606e-20	-0.66688	0.792	0.812	1.52275e-15	1 VIM/GFAP
HNRNPA1	5.11444e-20	-0.500561	0.547	0.647	1.906e-15	1 VIM/GFAP
ITM2C	6.72518e-20	0.458807	0.527	0.359	2.50627e-15	1 VIM/GFAP
STMN4	1.03312e-19	-0.9784	0.054	0.193	3.85012e-15	1 VIM/GFAP
SPP1	1.43722e-19	0.946934	0.266	0.141	5.35608e-15	1 VIM/GFAP
NSG1	2.06562e-19	-0.786942	0.024	0.15	7.69794e-15	1 VIM/GFAP
FBXO32	2.07292e-19	0.369188	0.112	0.038	7.72515e-15	1 VIM/GFAP
HTRA1	2.24835e-19	0.390787	0.346	0.192	8.37891e-15	1 VIM/GFAP
MAP2	2.89987e-19	-0.680292	0.276	0.423	1.08069e-14	1 VIM/GFAP
S100A13	3.33505e-19	0.387627	0.216	0.102	1.24287e-14	1 VIM/GFAP
SOX11	3.41712e-19	-0.824827	0.125	0.275	1.27346e-14	1 VIM/GFAP
ARID5B	3.50893e-19	0.2848	0.159	0.065	1.30767e-14	1 VIM/GFAP
DCX	5.59715e-19	-0.736596	0.023	0.145	2.08589e-14	1 VIM/GFAP
GEM	5.72e-19	0.434353	0.107	0.036	2.13167e-14	1 VIM/GFAP
SHC1	1.15113e-18	0.360918	0.144	0.057	4.28992e-14	1 VIM/GFAP
RAMP1	1.35676e-18	0.370834	0.456	0.288	5.05625e-14	1 VIM/GFAP
RNF19A	1.54684e-18	0.34573	0.153	0.062	5.7646e-14	1 VIM/GFAP
PAFAH1B3	1.56685e-18	-0.66784	0.166	0.315	5.83919e-14	1 VIM/GFAP
RARRES3	1.57181e-18	0.411131	0.145	0.058	5.85765e-14	1 VIM/GFAP
SLN	1.86721e-18	0.697108	0.107	0.037	6.95853e-14	1 VIM/GFAP
CHL1	2.12305e-18	0.500648	0.245	0.127	7.91197e-14	1 VIM/GFAP
NUPR1	2.80641e-18	0.327331	0.34	0.194	1.04586e-13	1 VIM/GFAP
NFKBIA	3.50138e-18	0.608074	0.282	0.159	1.30486e-13	1 VIM/GFAP
SET	5.83887e-18	-0.589	0.352	0.488	2.17597e-13	1 VIM/GFAP
SPOCK2	7.39954e-18	0.377776	0.139	0.056	2.75759e-13	1 VIM/GFAP
COL6A1	8.52918e-18	0.477861	0.196	0.094	3.17857e-13	1 VIM/GFAP
CYSTM1	9.77343e-18	0.395983	0.24	0.123	3.64226e-13	1 VIM/GFAP
SOX4	9.99307e-18	-0.904984	0.222	0.362	3.72412e-13	1 VIM/GFAP
MLLT11	1.73031e-17	-0.738597	0.133	0.271	6.44836e-13	1 VIM/GFAP
BEX1	1.79996e-17	-0.519936	0.242	0.398	6.7079e-13	1 VIM/GFAP
HLA-J	2.18971e-17	0.356218	0.284	0.156	8.1604e-13	1 VIM/GFAP
SCARA3	2.54068e-17	0.395701	0.208	0.103	9.46834e-13	1 VIM/GFAP
SOCS3	2.67289e-17	0.433844	0.115	0.042	9.96106e-13	1 VIM/GFAP
CLIC4	2.71665e-17	0.506985	0.375	0.243	1.01241e-12	1 VIM/GFAP
DNAJB1	2.80822e-17	0.386362	0.449	0.298	1.04654e-12	1 VIM/GFAP
ELAVL4	3.27972e-17	-0.767699	0.033	0.151	1.22225e-12	1 VIM/GFAP
NEAT1	4.04227e-17	0.492891	0.295	0.168	1.50643e-12	1 VIM/GFAP
TRIP6	4.43263e-17	0.376639	0.257	0.137	1.65191e-12	1 VIM/GFAP
CSRP2	6.35799e-17	0.428658	0.258	0.141	2.36943e-12	1 VIM/GFAP
FTL	7.58716e-17	0.394828	0.849	0.795	2.82751e-12	1 VIM/GFAP
TUBB2B	7.61509e-17	-0.510575	0.553	0.642	2.83791e-12	1 VIM/GFAP
FERMT2	9.80452e-17	0.355398	0.216	0.11	3.65385e-12	1 VIM/GFAP
GATM	1.00152e-16	0.338291	0.415	0.262	3.73235e-12	1 VIM/GFAP
OSMR	1.10348e-16	0.252585	0.101	0.035	4.11233e-12	1 VIM/GFAP
MT2P1	1.11553e-16	0.466059	0.44	0.285	4.15723e-12	1 VIM/GFAP
PFN2	1.13015e-16	-0.648558	0.254	0.396	4.21173e-12	1 VIM/GFAP
MT1F	1.42224e-16	0.365353	0.193	0.092	5.30028e-12	1 VIM/GFAP
BAG3	1.89872e-16	0.304123	0.107	0.039	7.07595e-12	1 VIM/GFAP
KLF6	1.96754e-16	0.556429	0.246	0.136	7.33244e-12	1 VIM/GFAP
SERTAD1	2.14002e-16	0.3147	0.137	0.056	7.97521e-12	1 VIM/GFAP
S100A16	4.49922e-16	0.310324	0.35	0.208	1.67673e-11	1 VIM/GFAP
EFEMP2	4.8936e-16	0.27893	0.169	0.077	1.8237e-11	1 VIM/GFAP
RPL35	7.76356e-16	-0.366661	0.686	0.745	2.89325e-11	1 VIM/GFAP
TIPARP	8.05925e-16	0.329844	0.14	0.06	3.00344e-11	1 VIM/GFAP
MT1L	1.04005e-15	0.279706	0.21	0.105	3.87594e-11	1 VIM/GFAP
H2AFZ	1.05457e-15	-0.48068	0.32	0.464	3.93005e-11	1 VIM/GFAP
SHD	1.20568e-15	-0.554885	0.017	0.117	4.49321e-11	1 VIM/GFAP
RPL35A	1.47941e-15	-0.275589	0.837	0.873	5.5133e-11	1 VIM/GFAP
ANXA5	1.59911e-15	0.293726	0.53	0.37	5.95942e-11	1 VIM/GFAP
WTAP	1.68569e-15	0.599272	0.323	0.206	6.28206e-11	1 VIM/GFAP
CAVIN1	1.69778e-15	0.343919	0.103	0.038	6.32711e-11	1 VIM/GFAP
PAM	1.88365e-15	0.344337	0.218	0.113	7.0198e-11	1 VIM/GFAP
TUBA1B	3.78743e-15	-0.449981	0.653	0.721	1.41146e-10	1 VIM/GFAP
RAB13	4.04671e-15	0.347745	0.281	0.162	1.50809e-10	1 VIM/GFAP
LTBP3	5.146e-15	0.339059	0.216	0.114	1.91776e-10	1 VIM/GFAP
SPATS2L	6.80884e-15	0.271894	0.282	0.161	2.53745e-10	1 VIM/GFAP
CTSD	7.47453e-15	0.373563	0.352	0.223	2.78553e-10	1 VIM/GFAP
HNRNPD	8.3701e-15	-0.533746	0.373	0.485	3.11928e-10	1 VIM/GFAP
SNRPD2	1.00495e-14	-0.366107	0.636	0.704	3.74514e-10	1 VIM/GFAP
CHPT1	1.14733e-14	0.277183	0.163	0.078	4.27577e-10	1 VIM/GFAP
CEBPB	1.33621e-14	0.303917	0.195	0.098	4.97967e-10	1 VIM/GFAP
COX7A2	2.12593e-14	-0.345381	0.644	0.728	7.92269e-10	1 VIM/GFAP
GPC2	2.18524e-14	-0.554387	0.029	0.129	8.14373e-10	1 VIM/GFAP
LYPD1	2.48885e-14	0.28099	0.233	0.125	9.2752e-10	1 VIM/GFAP
LAPTM4A	2.92628e-14	0.271476	0.447	0.311	1.09053e-09	1 VIM/GFAP
SMOX	2.98741e-14	0.355107	0.147	0.067	1.11332e-09	1 VIM/GFAP
MT1P3	3.06094e-14	0.32155	0.104	0.04	1.14072e-09	1 VIM/GFAP
FCGRT	3.22091e-14	0.288769	0.201	0.104	1.20034e-09	1 VIM/GFAP
UCHL1	3.30423e-14	-0.52296	0.393	0.508	1.23139e-09	1 VIM/GFAP
PLOD1	3.62785e-14	0.299598	0.14	0.063	1.35199e-09	1 VIM/GFAP
RPL7A	4.77725e-14	-0.375124	0.514	0.614	1.78034e-09	1 VIM/GFAP
RPSA	4.81552e-14	-0.321249	0.722	0.767	1.7946e-09	1 VIM/GFAP
WLS	5.74595e-14	0.26603	0.237	0.13	2.14134e-09	1 VIM/GFAP
HNRNPA2B1	6.70916e-14	-0.299057	0.782	0.812	2.5003e-09	1 VIM/GFAP
MSN	7.04265e-14	0.361517	0.198	0.103	2.62459e-09	1 VIM/GFAP
PFKFB3	7.98142e-14	0.304837	0.127	0.055	2.97443e-09	1 VIM/GFAP
PEA15	9.06956e-14	0.256292	0.47	0.322	3.37995e-09	1 VIM/GFAP
DTNA	9.46289e-14	0.425033	0.296	0.181	3.52654e-09	1 VIM/GFAP
APOL2	1.16478e-13	0.288028	0.128	0.056	4.34079e-09	1 VIM/GFAP
PON2	1.17603e-13	0.285399	0.523	0.377	4.3827e-09	1 VIM/GFAP
RASSF4	1.9393e-13	0.414565	0.237	0.134	7.22719e-09	1 VIM/GFAP
CD151	3.22853e-13	0.331693	0.337	0.212	1.20318e-08	1 VIM/GFAP
LAMP2	3.68327e-13	0.307828	0.273	0.163	1.37264e-08	1 VIM/GFAP
HES6	3.94097e-13	-0.606895	0.104	0.221	1.46868e-08	1 VIM/GFAP
CENPV	4.04439e-13	-0.438785	0.05	0.152	1.50722e-08	1 VIM/GFAP
FXYD6	4.59491e-13	-0.412618	0.417	0.543	1.71239e-08	1 VIM/GFAP
BCL6	4.82041e-13	0.588536	0.199	0.109	1.79642e-08	1 VIM/GFAP
GAP43	4.88589e-13	0.608006	0.379	0.272	1.82083e-08	1 VIM/GFAP
LRP10	6.31458e-13	0.300392	0.148	0.071	2.35325e-08	1 VIM/GFAP
GADD45A	6.66976e-13	0.316457	0.367	0.242	2.48562e-08	1 VIM/GFAP
CLIC1	6.71556e-13	0.25601	0.178	0.091	2.50269e-08	1 VIM/GFAP
C11orf96	7.16304e-13	0.568557	0.184	0.098	2.66945e-08	1 VIM/GFAP
AGAP2	7.2995e-13	-0.64392	0.047	0.145	2.7203e-08	1 VIM/GFAP
LDHB	8.17542e-13	-0.318351	0.576	0.669	3.04673e-08	1 VIM/GFAP
CA12	9.04138e-13	0.400771	0.125	0.057	3.36945e-08	1 VIM/GFAP
RBP1	9.74587e-13	-0.595036	0.289	0.403	3.63199e-08	1 VIM/GFAP
TPST1	1.02848e-12	0.345531	0.172	0.089	3.83285e-08	1 VIM/GFAP
PGM2L1	1.14731e-12	0.269454	0.147	0.07	4.2757e-08	1 VIM/GFAP
SELENOP	1.17458e-12	0.288824	0.151	0.073	4.37732e-08	1 VIM/GFAP
IFI16	1.2375e-12	0.42627	0.178	0.094	4.61181e-08	1 VIM/GFAP
ALDOA	1.24806e-12	0.25874	0.773	0.666	4.65115e-08	1 VIM/GFAP
SLC39A14	1.25776e-12	0.35732	0.15	0.073	4.68729e-08	1 VIM/GFAP
CALM3	1.65515e-12	-0.532598	0.293	0.402	6.16824e-08	1 VIM/GFAP
LPL	1.66688e-12	0.337884	0.254	0.151	6.21196e-08	1 VIM/GFAP
RPL32	1.7798e-12	-0.256549	0.841	0.884	6.63276e-08	1 VIM/GFAP
PDLIM4	2.47304e-12	0.316614	0.136	0.064	9.21627e-08	1 VIM/GFAP
MDM2	2.54724e-12	-0.450083	0.224	0.348	9.49279e-08	1 VIM/GFAP
RPL14	3.11286e-12	-0.281494	0.666	0.736	1.16007e-07	1 VIM/GFAP
CD81	3.22011e-12	0.278019	0.588	0.446	1.20004e-07	1 VIM/GFAP
JUND	3.75014e-12	0.426496	0.503	0.383	1.39756e-07	1 VIM/GFAP
EVL	3.75879e-12	-0.507028	0.101	0.21	1.40079e-07	1 VIM/GFAP
COL5A2	4.06455e-12	0.304923	0.124	0.057	1.51474e-07	1 VIM/GFAP
PLIN3	4.37873e-12	0.376798	0.153	0.076	1.63182e-07	1 VIM/GFAP
GIHCG	5.93117e-12	-0.596534	0.192	0.316	2.21037e-07	1 VIM/GFAP
NPC2	5.9438e-12	0.287556	0.236	0.137	2.21508e-07	1 VIM/GFAP
LGALS3BP	6.61981e-12	0.364088	0.279	0.175	2.467e-07	1 VIM/GFAP
MYL12A	7.86501e-12	0.260554	0.257	0.153	2.93105e-07	1 VIM/GFAP
SRPX	8.88984e-12	0.285603	0.202	0.113	3.31298e-07	1 VIM/GFAP
MYL6P3	9.13043e-12	0.265547	0.137	0.066	3.40264e-07	1 VIM/GFAP
PLPPR1	9.67982e-12	-0.426148	0.023	0.104	3.60738e-07	1 VIM/GFAP
ATCAY	1.07127e-11	-0.41457	0.024	0.107	3.99232e-07	1 VIM/GFAP
OLIG1	1.08248e-11	-0.609967	0.227	0.342	4.03406e-07	1 VIM/GFAP
PTMAP5	1.12839e-11	-0.457543	0.151	0.266	4.20516e-07	1 VIM/GFAP
CCDC167	1.43912e-11	-0.456605	0.16	0.274	5.36316e-07	1 VIM/GFAP
ACOT7	1.68606e-11	-0.479596	0.057	0.15	6.28345e-07	1 VIM/GFAP
C4orf48	2.23472e-11	-0.556784	0.216	0.326	8.32812e-07	1 VIM/GFAP
NFKBIZ	2.66577e-11	0.35791	0.104	0.046	9.93453e-07	1 VIM/GFAP
EPAS1	3.05316e-11	0.279094	0.166	0.088	1.13782e-06	1 VIM/GFAP
PSMA7	3.298e-11	-0.295352	0.609	0.671	1.22907e-06	1 VIM/GFAP
CRMP1	3.36572e-11	-0.523235	0.091	0.189	1.2543e-06	1 VIM/GFAP
RHOC	3.38313e-11	0.283288	0.314	0.204	1.26079e-06	1 VIM/GFAP
NEDD9	3.47386e-11	0.356802	0.133	0.065	1.2946e-06	1 VIM/GFAP
CD47	3.67632e-11	0.252602	0.15	0.076	1.37005e-06	1 VIM/GFAP
MCL1	3.99294e-11	0.364795	0.29	0.189	1.48805e-06	1 VIM/GFAP
AHCYL1	4.02335e-11	0.369901	0.269	0.169	1.49938e-06	1 VIM/GFAP
TMEM123	4.34521e-11	0.291781	0.184	0.102	1.61933e-06	1 VIM/GFAP
SERPINB6	4.68731e-11	0.309832	0.199	0.113	1.74682e-06	1 VIM/GFAP
PNRC1	6.08598e-11	0.335211	0.285	0.183	2.26806e-06	1 VIM/GFAP
GSTA4	6.77271e-11	-0.381439	0.053	0.142	2.52399e-06	1 VIM/GFAP
HNRNPA3	7.10965e-11	-0.419298	0.373	0.47	2.64955e-06	1 VIM/GFAP
OCIAD2	7.61594e-11	0.391607	0.299	0.197	2.83823e-06	1 VIM/GFAP
NME1	7.69117e-11	-0.403169	0.415	0.51	2.86627e-06	1 VIM/GFAP
TMPO	9.26476e-11	-0.527937	0.116	0.217	3.4527e-06	1 VIM/GFAP
COX7C	9.66201e-11	-0.25143	0.772	0.818	3.60074e-06	1 VIM/GFAP
TUBA1C	1.30716e-10	0.290577	0.335	0.227	4.87141e-06	1 VIM/GFAP
BAALC	1.49766e-10	0.28752	0.495	0.372	5.58134e-06	1 VIM/GFAP
GNG2	1.58962e-10	-0.464152	0.082	0.176	5.92402e-06	1 VIM/GFAP
ELAVL3	1.64026e-10	-0.400444	0.066	0.157	6.11276e-06	1 VIM/GFAP
MMP14	1.66812e-10	0.27609	0.166	0.091	6.21658e-06	1 VIM/GFAP
MARCH9	1.71561e-10	-0.486543	0.1	0.2	6.39355e-06	1 VIM/GFAP
SORBS1	1.72878e-10	0.317041	0.13	0.064	6.44265e-06	1 VIM/GFAP
SOX9	1.77428e-10	0.270913	0.337	0.223	6.61221e-06	1 VIM/GFAP
FTH1P7	1.80643e-10	0.254644	0.391	0.276	6.73204e-06	1 VIM/GFAP
FABP5P1	1.82369e-10	0.265278	0.122	0.059	6.79634e-06	1 VIM/GFAP
HMGN2	2.23672e-10	-0.456211	0.429	0.509	8.33557e-06	1 VIM/GFAP
ZNF428	3.0695e-10	-0.391877	0.335	0.437	1.14391e-05	1 VIM/GFAP
MT1P1	3.21535e-10	0.252636	0.104	0.048	1.19826e-05	1 VIM/GFAP
C12orf57	3.37987e-10	-0.379362	0.394	0.488	1.25957e-05	1 VIM/GFAP
TBCB	3.39595e-10	-0.375561	0.468	0.557	1.26557e-05	1 VIM/GFAP
FABP5	3.48109e-10	0.413135	0.568	0.457	1.2973e-05	1 VIM/GFAP
CKB	3.48593e-10	-0.284993	0.636	0.727	1.2991e-05	1 VIM/GFAP
PGRMC1	3.64379e-10	-0.396946	0.144	0.248	1.35793e-05	1 VIM/GFAP
TMEM158	4.03143e-10	0.486981	0.23	0.143	1.50239e-05	1 VIM/GFAP
GRIA2	4.0604e-10	-0.508098	0.109	0.203	1.51319e-05	1 VIM/GFAP
LRIG1	4.11595e-10	0.344012	0.218	0.131	1.53389e-05	1 VIM/GFAP
PLPP3	4.27103e-10	0.256202	0.178	0.1	1.59169e-05	1 VIM/GFAP
ITGB8	4.36836e-10	0.297828	0.313	0.208	1.62796e-05	1 VIM/GFAP
TUBBP1	5.33027e-10	-0.394637	0.044	0.123	1.98643e-05	1 VIM/GFAP
MT1M	5.59224e-10	0.320755	0.287	0.183	2.08406e-05	1 VIM/GFAP
NFIB	5.65594e-10	-0.515939	0.216	0.315	2.1078e-05	1 VIM/GFAP
RAN	6.35299e-10	-0.331906	0.542	0.606	2.36757e-05	1 VIM/GFAP
PPP1R15A	6.50794e-10	0.326505	0.186	0.106	2.42531e-05	1 VIM/GFAP
MEG3	6.62967e-10	-0.648345	0.107	0.203	2.47068e-05	1 VIM/GFAP
MARCKS	8.75138e-10	-0.328264	0.693	0.724	3.26138e-05	1 VIM/GFAP
COX7B	9.36335e-10	-0.269681	0.532	0.626	3.48944e-05	1 VIM/GFAP
BDH2	1.03546e-09	0.266313	0.112	0.054	3.85886e-05	1 VIM/GFAP
HAP1	1.03878e-09	-0.513998	0.1	0.194	3.87123e-05	1 VIM/GFAP
TYMS	1.08236e-09	-0.41289	0.083	0.174	4.03364e-05	1 VIM/GFAP
FABP7	1.12022e-09	0.251962	0.55	0.419	4.17473e-05	1 VIM/GFAP
GADD45G	1.18714e-09	-0.482046	0.065	0.15	4.42412e-05	1 VIM/GFAP
LMNA	1.36422e-09	0.426192	0.231	0.148	5.08404e-05	1 VIM/GFAP
RASD1	1.44139e-09	0.33313	0.104	0.049	5.37162e-05	1 VIM/GFAP
NCAM1	1.52546e-09	-0.438428	0.307	0.401	5.68493e-05	1 VIM/GFAP
MYL6P5	1.63973e-09	0.310009	0.193	0.117	6.11077e-05	1 VIM/GFAP
NTRK2	1.68778e-09	0.38671	0.249	0.162	6.28987e-05	1 VIM/GFAP
TOP2A	1.73051e-09	-0.500016	0.045	0.123	6.44909e-05	1 VIM/GFAP
CTSA	2.45246e-09	0.266192	0.192	0.115	9.13959e-05	1 VIM/GFAP
DAZAP2	2.73085e-09	0.257169	0.32	0.22	0.000101771	1 VIM/GFAP
SUMO2	3.09891e-09	-0.294569	0.508	0.588	0.000115487	1 VIM/GFAP
ADAM9	3.15315e-09	0.25344	0.181	0.106	0.000117509	1 VIM/GFAP
LSM3	3.26792e-09	-0.384067	0.273	0.373	0.000121785	1 VIM/GFAP
VMP1	3.68928e-09	0.328218	0.215	0.133	0.000137488	1 VIM/GFAP
SERPINE1	3.73148e-09	0.361479	0.103	0.049	0.000139061	1 VIM/GFAP
ITGA7	3.92613e-09	0.253077	0.156	0.087	0.000146315	1 VIM/GFAP
SLC3A2	4.09406e-09	0.26251	0.423	0.312	0.000152573	1 VIM/GFAP
LAMB2	4.4328e-09	0.30361	0.13	0.068	0.000165197	1 VIM/GFAP
TNR	4.44705e-09	-0.457658	0.039	0.111	0.000165728	1 VIM/GFAP
PCP4	5.03756e-09	-0.544244	0.032	0.101	0.000187735	1 VIM/GFAP
IQGAP1	5.37317e-09	0.277031	0.142	0.078	0.000200242	1 VIM/GFAP
PCSK1N	5.49833e-09	-0.481753	0.169	0.265	0.000204906	1 VIM/GFAP
ZDHHC9	5.55395e-09	0.351603	0.128	0.068	0.000206979	1 VIM/GFAP
CSTB	5.82894e-09	0.263832	0.385	0.278	0.000217227	1 VIM/GFAP
NDUFB11	6.18471e-09	-0.33399	0.429	0.507	0.000230486	1 VIM/GFAP
TSFM	6.27426e-09	-0.57024	0.178	0.273	0.000233823	1 VIM/GFAP
GPC1	6.70466e-09	0.334774	0.184	0.11	0.000249863	1 VIM/GFAP
FUS	6.70548e-09	-0.39866	0.417	0.491	0.000249893	1 VIM/GFAP
TSPAN13	6.90009e-09	-0.476135	0.076	0.154	0.000257146	1 VIM/GFAP
MCM7	7.72713e-09	-0.334323	0.118	0.21	0.000287967	1 VIM/GFAP
GLCCI1	7.92389e-09	-0.410949	0.053	0.128	0.0002953	1 VIM/GFAP
DNER	8.17524e-09	-0.370045	0.113	0.204	0.000304667	1 VIM/GFAP
PTTG1IP	8.43581e-09	0.334884	0.349	0.249	0.000314378	1 VIM/GFAP
GSN	8.77334e-09	0.290248	0.125	0.066	0.000326956	1 VIM/GFAP
NASP	9.60414e-09	-0.35709	0.21	0.305	0.000357917	1 VIM/GFAP
HMGB2	1.06624e-08	-0.441488	0.196	0.291	0.000397357	1 VIM/GFAP
PPFIA1	1.07641e-08	0.276821	0.116	0.06	0.000401144	1 VIM/GFAP
SDCBP	1.10084e-08	0.281306	0.257	0.169	0.000410251	1 VIM/GFAP
GNG4	1.16068e-08	-0.319769	0.036	0.105	0.000432549	1 VIM/GFAP
ARRDC3	1.20147e-08	0.29044	0.15	0.084	0.000447751	1 VIM/GFAP
NRXN2	1.40795e-08	-0.393101	0.098	0.181	0.000524702	1 VIM/GFAP
H2AFY	1.62925e-08	-0.39081	0.32	0.407	0.000607174	1 VIM/GFAP
VEGFA	1.64678e-08	0.326409	0.344	0.245	0.000613704	1 VIM/GFAP
PTPRS	1.81927e-08	-0.43294	0.192	0.283	0.000677987	1 VIM/GFAP
PMP2	1.95709e-08	0.366508	0.273	0.187	0.000729347	1 VIM/GFAP
CLASP2	2.19561e-08	-0.423559	0.115	0.2	0.00081824	1 VIM/GFAP
SOX8	2.4213e-08	-0.444931	0.06	0.135	0.000902344	1 VIM/GFAP
DYNLL2	2.52633e-08	-0.412012	0.137	0.224	0.000941487	1 VIM/GFAP
ALDOC	3.09078e-08	0.29019	0.246	0.162	0.00115184	1 VIM/GFAP
FTH1P10	3.09481e-08	0.315529	0.435	0.342	0.00115334	1 VIM/GFAP
TTC3	3.229e-08	-0.454873	0.285	0.368	0.00120335	1 VIM/GFAP
CD59	3.92738e-08	0.26822	0.323	0.23	0.00146362	1 VIM/GFAP
UBE2T	4.04534e-08	-0.306442	0.051	0.123	0.00150758	1 VIM/GFAP
SNRPD1	4.13828e-08	-0.387781	0.319	0.399	0.00154221	1 VIM/GFAP
CCNG2	4.48337e-08	-0.331387	0.053	0.124	0.00167082	1 VIM/GFAP
RPL22	5.06256e-08	-0.300734	0.583	0.641	0.00188666	1 VIM/GFAP
PCBP4	5.36622e-08	-0.388339	0.094	0.174	0.00199983	1 VIM/GFAP
CHPF	5.42536e-08	0.359489	0.202	0.129	0.00202187	1 VIM/GFAP
HMGB3	5.46547e-08	-0.324454	0.069	0.145	0.00203682	1 VIM/GFAP
JAM2	6.21645e-08	0.25581	0.228	0.15	0.00231668	1 VIM/GFAP
POSTN	6.24294e-08	0.313996	0.189	0.118	0.00232656	1 VIM/GFAP
HDAC2	6.75045e-08	-0.411767	0.151	0.234	0.00251569	1 VIM/GFAP
UBE2S	6.76268e-08	-0.445601	0.219	0.31	0.00252025	1 VIM/GFAP
GPRC5B	6.98811e-08	0.283384	0.299	0.212	0.00260426	1 VIM/GFAP
PPDPF	7.41716e-08	-0.254344	0.541	0.619	0.00276415	1 VIM/GFAP
HNRNPH1	9.06595e-08	-0.310815	0.509	0.571	0.00337861	1 VIM/GFAP
RFC4	9.31774e-08	-0.36386	0.06	0.13	0.00347244	1 VIM/GFAP
HMGB1	9.75674e-08	-0.35827	0.566	0.601	0.00363605	1 VIM/GFAP
ATP5MC3	9.96747e-08	-0.265237	0.486	0.569	0.00371458	1 VIM/GFAP
SLIRP	1.02209e-07	-0.335494	0.438	0.515	0.00380903	1 VIM/GFAP
ATP5IF1	1.03662e-07	-0.320794	0.36	0.454	0.00386319	1 VIM/GFAP
TP53BP2	1.07233e-07	0.252758	0.109	0.058	0.00399624	1 VIM/GFAP
PRDX6	1.1317e-07	0.293301	0.353	0.266	0.00421749	1 VIM/GFAP
STAT3	1.19355e-07	0.279251	0.172	0.106	0.00444799	1 VIM/GFAP
PJA2	1.28112e-07	0.253283	0.266	0.183	0.00477435	1 VIM/GFAP
FTH1P5	1.35126e-07	0.263094	0.287	0.203	0.00503572	1 VIM/GFAP
RCC2	1.44511e-07	-0.325188	0.112	0.191	0.00538548	1 VIM/GFAP
2003-09-01	1.517e-07	-0.352111	0.048	0.113	0.00565341	1 VIM/GFAP
SFPQ	1.53527e-07	-0.371479	0.301	0.38	0.00572149	1 VIM/GFAP
FTH1P2	1.53906e-07	0.253442	0.328	0.24	0.00573561	1 VIM/GFAP
ITM2B	1.60922e-07	0.270667	0.586	0.491	0.00599709	1 VIM/GFAP
MYL6B	1.61338e-07	-0.354271	0.314	0.4	0.00601259	1 VIM/GFAP
KIF5C	1.64711e-07	-0.321687	0.045	0.11	0.00613828	1 VIM/GFAP
RPS20P2	1.72288e-07	-0.386163	0.113	0.193	0.00642067	1 VIM/GFAP
PFDN2	1.77243e-07	-0.312791	0.225	0.308	0.0066053	1 VIM/GFAP
DPYSL3	1.82756e-07	-0.487303	0.246	0.323	0.00681077	1 VIM/GFAP
SEMA6A	1.86026e-07	0.258608	0.162	0.099	0.00693262	1 VIM/GFAP
OGA	1.91701e-07	-0.343696	0.076	0.148	0.00714413	1 VIM/GFAP
NMB	1.95783e-07	0.414939	0.255	0.178	0.00729625	1 VIM/GFAP
OLIG2	2.13879e-07	-0.379908	0.083	0.156	0.00797061	1 VIM/GFAP
RPL7AP10	2.52937e-07	-0.298378	0.041	0.102	0.00942621	1 VIM/GFAP
LHFPL6	2.84018e-07	0.274172	0.205	0.134	0.0105845	1 VIM/GFAP
HNRNPH3	2.90109e-07	-0.31745	0.193	0.281	0.0108115	1 VIM/GFAP
ATP1A1	2.99598e-07	0.26604	0.302	0.218	0.0111651	1 VIM/GFAP
HSPA1A	3.03652e-07	0.272861	0.539	0.441	0.0113162	1 VIM/GFAP
BIRC5	3.30839e-07	-0.356683	0.063	0.131	0.0123294	1 VIM/GFAP
RNASEH2A	3.40681e-07	-0.307134	0.053	0.117	0.0126962	1 VIM/GFAP
OS9	3.42061e-07	-0.448253	0.249	0.329	0.0127476	1 VIM/GFAP
ATP5MC1	4.75278e-07	-0.254324	0.272	0.366	0.0177122	1 VIM/GFAP
RDX	4.89804e-07	0.26083	0.347	0.263	0.0182535	1 VIM/GFAP
CASK	5.02365e-07	-0.381951	0.092	0.162	0.0187216	1 VIM/GFAP
IER2	5.15814e-07	0.351935	0.273	0.194	0.0192228	1 VIM/GFAP
PHLDA1	5.23929e-07	0.28165	0.328	0.245	0.0195253	1 VIM/GFAP
TRA2B	5.51503e-07	-0.423837	0.293	0.362	0.0205529	1 VIM/GFAP
NREP	6.34522e-07	-0.423347	0.157	0.235	0.0236467	1 VIM/GFAP
TCEAL2	6.51122e-07	-0.389536	0.103	0.174	0.0242654	1 VIM/GFAP
MAD2L2	7.52129e-07	-0.290236	0.124	0.202	0.0280296	1 VIM/GFAP
HIF1A	8.17752e-07	0.265865	0.334	0.252	0.0304752	1 VIM/GFAP
METTL7B	9.8431e-07	0.268966	0.177	0.112	0.0366823	1 VIM/GFAP
RBFOX2	9.90712e-07	-0.374766	0.085	0.152	0.0369208	1 VIM/GFAP
CENPF	1.36511e-06	-0.3867	0.048	0.106	0.0508734	1
APLP1	1.37657e-06	-0.412231	0.144	0.215	0.0513008	1
EDF1	1.41361e-06	-0.29786	0.486	0.542	0.0526808	1
HMGB1P5	1.41595e-06	-0.326787	0.139	0.215	0.0527681	1
ANP32B	1.47291e-06	-0.372637	0.139	0.211	0.0548908	1
HNRNPAB	1.49791e-06	-0.349743	0.224	0.302	0.0558225	1
BCAN	2.45421e-06	-0.326241	0.432	0.492	0.0914611	1
CNRIP1	2.48436e-06	-0.347105	0.145	0.218	0.0925847	1
E2F3	2.50887e-06	-0.301899	0.05	0.107	0.093498	1
YWHAB	2.62658e-06	-0.271616	0.523	0.571	0.0978849	1
RPAIN	2.79901e-06	-0.291744	0.305	0.38	0.104311	1
ACTN4	2.81897e-06	0.263531	0.196	0.132	0.105054	1
WDR82	2.95274e-06	-0.380229	0.163	0.234	0.11004	1
PSMD2	3.09693e-06	-0.387361	0.263	0.333	0.115413	1
PSMB6	3.09912e-06	-0.264064	0.414	0.487	0.115495	1
RPL39L	3.32659e-06	-0.284847	0.062	0.121	0.123972	1
PRDX2	3.39717e-06	-0.272947	0.441	0.499	0.126602	1
PARK7	3.59644e-06	-0.351305	0.233	0.307	0.134029	1
SNRPE	4.05649e-06	-0.327185	0.337	0.403	0.151173	1
FJX1	4.12188e-06	0.277285	0.112	0.066	0.15361	1
NDUFA3	4.71533e-06	-0.250182	0.45	0.512	0.175726	1
FTLP3	4.76458e-06	0.260563	0.414	0.337	0.177562	1
PTOV1	5.19051e-06	-0.29458	0.304	0.376	0.193435	1
RCAN1	5.50256e-06	0.427559	0.14	0.088	0.205064	1
TOP2B	6.05507e-06	-0.341828	0.151	0.219	0.225654	1
SNRPG	6.39836e-06	-0.300412	0.409	0.473	0.238448	1
SNHG6	6.84455e-06	-0.310241	0.352	0.42	0.255076	1
TMEM160	7.26052e-06	-0.296195	0.252	0.326	0.270578	1
TERF2IP	7.28453e-06	-0.371779	0.29	0.359	0.271472	1
PKIA	7.55357e-06	-0.346921	0.063	0.119	0.281499	1
TUBB2A	7.74121e-06	-0.457109	0.375	0.426	0.288492	1
SLIT1	8.4253e-06	-0.297258	0.092	0.157	0.313986	1
HNRNPDL	8.46332e-06	-0.294213	0.363	0.428	0.315402	1
WARS	1.05675e-05	0.319933	0.14	0.09	0.39382	1
RPL31P12	1.25511e-05	-0.315149	0.181	0.254	0.46774	1
KLC1	1.54321e-05	-0.33041	0.142	0.205	0.575109	1
DHFR	1.5649e-05	-0.280616	0.068	0.123	0.583193	1
NUDT1	1.62908e-05	-0.334566	0.166	0.233	0.607111	1
HNRNPUL1	1.66001e-05	-0.2514	0.156	0.223	0.618635	1
DCTN3	1.85089e-05	-0.265851	0.169	0.239	0.689773	1
TXNL4A	1.94213e-05	-0.269198	0.338	0.407	0.723773	1
ATAT1	2.10803e-05	-0.343343	0.08	0.135	0.785598	1
RBMX	2.23116e-05	-0.329588	0.251	0.316	0.831487	1
FUBP1	2.42513e-05	-0.348906	0.148	0.208	0.903774	1
HNRNPA1P48	2.53294e-05	-0.254583	0.134	0.2	0.943951	1
PEG10	2.71596e-05	-0.36256	0.069	0.122	1	1
NDRG1	3.04933e-05	0.256881	0.131	0.083	1	1
BZW2	3.102e-05	-0.324689	0.088	0.143	1	1
PCNA	3.12058e-05	-0.327165	0.142	0.205	1	1
KHDRBS1	3.15029e-05	-0.297134	0.275	0.341	1	1
CCT5	3.43545e-05	-0.294282	0.181	0.249	1	1
RGS2	3.51653e-05	0.444216	0.147	0.099	1	1
HSPA1B	4.029e-05	0.29533	0.52	0.454	1	1
ODC1	4.15419e-05	-0.251347	0.227	0.296	1	1
PJA1	4.24365e-05	-0.253044	0.085	0.141	1	1
GNAO1	4.42731e-05	-0.290387	0.062	0.112	1	1
FKBP3	4.47611e-05	-0.307179	0.245	0.308	1	1
YWHAG	4.48624e-05	-0.277009	0.319	0.382	1	1
TXN	4.86438e-05	-0.354337	0.384	0.438	1	1
SOX6	4.90163e-05	-0.291255	0.074	0.126	1	1
SLC1A2	4.95022e-05	0.251966	0.175	0.12	1	1
SIRT2	5.10587e-05	-0.495762	0.145	0.204	1	1
TRAF4	5.39416e-05	-0.282734	0.071	0.122	1	1
CAPN2	5.65165e-05	0.299276	0.16	0.111	1	1
IP6K2	5.82591e-05	-0.262362	0.221	0.287	1	1
CCND2	6.47154e-05	-0.275086	0.372	0.428	1	1
LSM7	6.47724e-05	-0.268779	0.434	0.477	1	1
RP9	6.87347e-05	-0.259126	0.118	0.176	1	1
PSRC1	7.44164e-05	0.255114	0.199	0.145	1	1
RPL13AP7	7.76171e-05	-0.318648	0.153	0.213	1	1
SUCLG1	8.16695e-05	-0.276753	0.222	0.289	1	1
ZEB2	8.54624e-05	-0.306877	0.121	0.176	1	1
DCTPP1	8.63737e-05	-0.251683	0.082	0.133	1	1
GANAB	8.97083e-05	0.260713	0.172	0.121	1	1
TCF4	0.000102426	-0.391258	0.36	0.406	1	1
LRRN1	0.000102435	-0.252877	0.118	0.175	1	1
TSPAN31	0.000104604	-0.362969	0.201	0.258	1	1
NUSAP1	0.000108623	-0.310979	0.059	0.104	1	1
ENHO	0.000111598	-0.274232	0.056	0.101	1	1
RANBP1	0.000112596	-0.26361	0.285	0.347	1	1
SEC61B	0.00012188	-0.275963	0.335	0.389	1	1
GPM6A	0.000124686	-0.253519	0.538	0.567	1	1
HIPK2	0.000126632	-0.270693	0.15	0.207	1	1
CCNI	0.000140437	-0.277953	0.382	0.436	1	1
MAP4K4	0.000141382	-0.310832	0.15	0.204	1	1
UBE2E3	0.000156754	-0.310724	0.139	0.193	1	1
C6orf48	0.000184537	-0.272058	0.435	0.481	1	1
SRSF2	0.000184703	-0.297212	0.266	0.32	1	1
BUB3	0.000200341	-0.253287	0.08	0.128	1	1
PTTG1	0.000223608	-0.422905	0.139	0.193	1	1
UBE2C	0.000253825	-0.351287	0.089	0.137	1	1
SLC2A1	0.000258257	0.255528	0.147	0.102	1	1
SETD5	0.000292441	-0.258161	0.198	0.259	1	1
YWHAQ	0.00030115	-0.255666	0.36	0.415	1	1
SGK1	0.000346721	0.45171	0.134	0.093	1	1
CADM2	0.000350046	-0.3342	0.184	0.238	1	1
RPL11P3	0.000426095	-0.27459	0.162	0.214	1	1
RTRAF	0.000444923	-0.255711	0.148	0.202	1	1
ACTL6A	0.000519184	-0.29125	0.095	0.14	1	1
BTG2	0.000557916	0.275684	0.174	0.128	1	1
MRFAP1L1	0.000615279	-0.27108	0.148	0.198	1	1
NRXN1	0.000640678	-0.284165	0.091	0.134	1	1
NDUFAF2	0.000697158	-0.277883	0.163	0.213	1	1
GSTM3	0.000728251	-0.260553	0.134	0.182	1	1
CKS2	0.000747294	-0.30771	0.157	0.206	1	1
DHX36	0.000865092	-0.287707	0.131	0.178	1	1
EEF1B2	0.000873988	-0.277892	0.323	0.366	1	1
NOVA1	0.000881733	-0.291247	0.397	0.437	1	1
CDC42	0.000908707	-0.257824	0.356	0.392	1	1
SCRG1	0.000920191	-0.300278	0.378	0.422	1	1
PSMA2	0.000928053	-0.25516	0.453	0.484	1	1
PBX1	0.000928746	-0.278945	0.11	0.155	1	1
DEK	0.00100497	-0.291029	0.195	0.242	1	1
OLA1	0.00104122	-0.285084	0.14	0.187	1	1
SCG3	0.00123196	-0.29489	0.089	0.129	1	1
YLPM1	0.00133816	-0.253504	0.083	0.123	1	1
RPL36A	0.00136997	-0.289531	0.39	0.42	1	1
TNK2	0.00137547	-0.280148	0.066	0.104	1	1
HNRNPA0	0.001518	-0.279398	0.269	0.312	1	1
DNAJC15	0.00160065	-0.259863	0.142	0.187	1	1
SLC44A1	0.00175723	-0.260423	0.124	0.169	1	1
ATP1B1	0.00232289	-0.270469	0.118	0.161	1	1
CORO1C	0.00320216	-0.273896	0.137	0.176	1	1
GNB4	0.00327803	-0.260551	0.094	0.131	1	1
ANP32E	0.00425345	-0.257837	0.095	0.131	1	1
KCNQ2	0.00472842	-0.260065	0.228	0.27	1	1
VMA21	0.00482055	-0.257715	0.122	0.159	1	1
PAK2	0.00597511	-0.258511	0.156	0.193	1	1
SYNM	6.9917e-189	1.74379	1	0.041	2.6056e-184	2 SYNM
S100A1	3.13133e-35	1.29497	0.415	0.038	1.16695e-30	2 SYNM
ZNF488	1.50383e-33	0.851858	0.244	0.014	5.60431e-29	2 SYNM
SFRP1	3.22323e-33	0.312389	0.171	0.007	1.2012e-28	2 SYNM
SEMA4D	2.06284e-32	1.22931	0.366	0.032	7.6876e-28	2 SYNM
MYRF	1.0834e-31	0.757863	0.293	0.021	4.03752e-27	2 SYNM
CDK18	4.21244e-30	0.738885	0.268	0.019	1.56985e-25	2 SYNM
BCAS1	5.65769e-30	1.88059	0.415	0.044	2.10845e-25	2 SYNM
SLC1A1	6.61978e-29	0.831998	0.39	0.04	2.467e-24	2 SYNM
TUBB4A	7.8563e-28	1.01193	0.561	0.081	2.92781e-23	2 SYNM
TF	1.5732e-27	1.2542	0.366	0.037	5.86286e-23	2 SYNM
SEMA5B	1.54665e-26	1.12319	0.488	0.066	5.7639e-22	2 SYNM
CCN3	3.00387e-26	0.557138	0.171	0.009	1.11945e-21	2 SYNM
LINC01447	1.10549e-25	0.438127	0.122	0.005	4.11984e-21	2 SYNM
LINC01089	4.21193e-25	0.840185	0.293	0.026	1.56966e-20	2 SYNM
MAN2A2	1.54141e-24	0.941912	0.488	0.071	5.74437e-20	2 SYNM
CACNA1H	4.47633e-22	0.368392	0.122	0.005	1.66819e-17	2 SYNM
SLC25A10	1.17743e-21	0.370645	0.244	0.021	4.38793e-17	2 SYNM
NEU4	1.36076e-21	0.808945	0.415	0.057	5.07114e-17	2 SYNM
COL9A3	4.95556e-21	0.924478	0.463	0.072	1.84679e-16	2 SYNM
TNR.1	1.2574e-20	0.903015	0.561	0.104	4.68596e-16	2 SYNM
PTPRJ	3.47841e-20	0.508497	0.268	0.027	1.2963e-15	2 SYNM
GAL3ST1	1.11486e-19	0.580916	0.22	0.019	4.15473e-15	2 SYNM
ELFN2	1.33044e-19	0.404438	0.195	0.015	4.95814e-15	2 SYNM
NFASC	1.99185e-19	1.01826	0.39	0.059	7.42303e-15	2 SYNM
KNG1	2.97929e-19	1.22261	0.39	0.058	1.11029e-14	2 SYNM
APOD	5.3816e-19	0.795264	0.512	0.094	2.00556e-14	2 SYNM
CKMT2	8.76484e-19	0.579078	0.146	0.009	3.26639e-14	2 SYNM
PKP4	1.0857e-18	0.868005	0.439	0.073	4.04607e-14	2 SYNM
ASIC1	1.37899e-18	0.76744	0.366	0.052	5.13907e-14	2 SYNM
CTAG2	1.4665e-18	0.525891	0.341	0.045	5.4652e-14	2 SYNM
RASGEF1B	1.67397e-18	0.659504	0.22	0.02	6.23837e-14	2 SYNM
TNS2	1.95227e-18	0.627227	0.22	0.02	7.27553e-14	2 SYNM
GPR17	5.23814e-18	0.852053	0.268	0.03	1.9521e-13	2 SYNM
PTGDS	5.94366e-18	1.08676	0.415	0.069	2.21502e-13	2 SYNM
MCM2	6.5289e-18	1.151	0.415	0.072	2.43313e-13	2 SYNM
RAPGEF1	1.25699e-17	0.622934	0.341	0.048	4.68441e-13	2 SYNM
SRCIN1	3.21072e-17	0.514568	0.244	0.026	1.19654e-12	2 SYNM
CLDN11	4.72274e-17	1.40718	0.39	0.066	1.76002e-12	2 SYNM
COL18A1	1.44012e-16	0.482727	0.171	0.014	5.36689e-12	2 SYNM
LIMS2	1.62628e-16	0.493964	0.171	0.014	6.06064e-12	2 SYNM
ATCAY.1	3.21005e-16	0.925205	0.488	0.099	1.19629e-11	2 SYNM
PLEKHA6	4.28531e-16	0.535888	0.171	0.015	1.59701e-11	2 SYNM
BIN1	5.5489e-16	0.676029	0.366	0.059	2.06791e-11	2 SYNM
SEC61A1	7.96612e-16	0.935308	0.707	0.2	2.96873e-11	2 SYNM
SIRT2.1	1.56832e-15	1.52868	0.659	0.198	5.84467e-11	2 SYNM
SERINC5	1.72236e-15	0.881394	0.463	0.096	6.41871e-11	2 SYNM
TMEM201	4.41973e-15	0.50528	0.22	0.025	1.6471e-10	2 SYNM
BICD2	1.01988e-14	0.705867	0.366	0.064	3.80077e-10	2 SYNM
NDN	1.03105e-14	0.323765	0.146	0.012	3.84243e-10	2 SYNM
PLP1	1.20991e-14	1.38784	0.488	0.115	4.50896e-10	2 SYNM
SOX8.1	2.55175e-14	0.798647	0.537	0.127	9.50962e-10	2 SYNM
ENPP6	2.67634e-14	0.891365	0.195	0.021	9.97391e-10	2 SYNM
APBB1	3.06266e-14	0.777689	0.488	0.11	1.14136e-09	2 SYNM
GTF2IP1	4.63163e-14	0.582524	0.293	0.044	1.72607e-09	2 SYNM
LRRTM1	4.74933e-14	0.282863	0.195	0.021	1.76993e-09	2 SYNM
E2F3.1	6.08531e-14	0.94089	0.463	0.101	2.26781e-09	2 SYNM
FERMT1	6.48555e-14	0.568429	0.317	0.051	2.41697e-09	2 SYNM
DSCAML1	6.52803e-14	0.301447	0.171	0.017	2.4328e-09	2 SYNM
MVB12B	1.0815e-13	0.722092	0.293	0.046	4.03043e-09	2 SYNM
HNRNPLP2	1.09287e-13	0.51467	0.244	0.033	4.0728e-09	2 SYNM
MIR4697HG	1.1127e-13	0.634841	0.293	0.045	4.14669e-09	2 SYNM
STRN	1.21519e-13	0.491981	0.244	0.033	4.52865e-09	2 SYNM
TCF7L2	2.12187e-13	0.679858	0.317	0.054	7.90757e-09	2 SYNM
HSPA12A	2.24024e-13	0.469779	0.22	0.027	8.34869e-09	2 SYNM
TOPBP1	2.74236e-13	0.64114	0.341	0.061	1.022e-08	2 SYNM
OGA.1	3.65952e-13	1.05405	0.537	0.14	1.36379e-08	2 SYNM
RGMB	4.43744e-13	0.914646	0.439	0.099	1.6537e-08	2 SYNM
TRIM16L	6.68487e-13	0.442271	0.244	0.034	2.49125e-08	2 SYNM
PRKCZ	6.88756e-13	0.422362	0.244	0.034	2.56679e-08	2 SYNM
B4GALNT4	7.30095e-13	0.510735	0.415	0.086	2.72085e-08	2 SYNM
AATK	1.20911e-12	0.655922	0.244	0.035	4.50598e-08	2 SYNM
RTKN	1.32766e-12	0.618882	0.366	0.072	4.94777e-08	2 SYNM
NLGN2	1.68963e-12	0.664229	0.415	0.091	6.29676e-08	2 SYNM
GIPC1	1.92225e-12	0.785104	0.366	0.075	7.16363e-08	2 SYNM
MMP15	1.93349e-12	0.576381	0.22	0.03	7.20554e-08	2 SYNM
UAP1L1	2.34927e-12	0.37524	0.171	0.019	8.75501e-08	2 SYNM
ZNF516	2.35953e-12	0.385492	0.244	0.036	8.79326e-08	2 SYNM
MEIS3	2.37374e-12	0.501032	0.293	0.049	8.84621e-08	2 SYNM
PFN2.1	4.18205e-12	1.03156	0.829	0.383	1.55852e-07	2 SYNM
COL20A1	4.38717e-12	0.643082	0.293	0.05	1.63497e-07	2 SYNM
SMOC1.1	8.37877e-12	0.774192	0.537	0.147	3.12252e-07	2 SYNM
EPHB1	9.24898e-12	0.808388	0.341	0.069	3.44682e-07	2 SYNM
PTCH1	1.31061e-11	0.36694	0.244	0.037	4.88427e-07	2 SYNM
KDM5C	1.42704e-11	0.712832	0.317	0.062	5.31813e-07	2 SYNM
FANCG	1.48393e-11	0.288389	0.171	0.02	5.53014e-07	2 SYNM
SNRPCP2	1.50649e-11	0.362833	0.171	0.02	5.61425e-07	2 SYNM
SOX10	1.89858e-11	0.786536	0.366	0.079	7.07544e-07	2 SYNM
GREB1	2.00567e-11	0.456378	0.146	0.015	7.47453e-07	2 SYNM
PODXL2	2.49055e-11	0.489489	0.439	0.104	9.28154e-07	2 SYNM
IQSEC1	3.22574e-11	0.540849	0.317	0.061	1.20214e-06	2 SYNM
FRMD5	3.39844e-11	0.42259	0.171	0.02	1.2665e-06	2 SYNM
NEPRO	4.66069e-11	0.576519	0.268	0.047	1.7369e-06	2 SYNM
SPTBN2	4.97652e-11	0.503642	0.171	0.021	1.8546e-06	2 SYNM
VIM.1	5.01298e-11	-2.80795	0	0.569	1.86819e-06	2 SYNM
ANGPTL2	6.15961e-11	0.448106	0.268	0.046	2.2955e-06	2 SYNM
NTN1	6.27974e-11	0.498464	0.244	0.04	2.34027e-06	2 SYNM
TMEM163	6.79473e-11	0.493937	0.244	0.04	2.53219e-06	2 SYNM
RTKN2	7.38451e-11	0.36681	0.22	0.033	2.75199e-06	2 SYNM
MAST1	7.77231e-11	0.346906	0.195	0.027	2.89651e-06	2 SYNM
PKNOX2	8.92276e-11	0.452215	0.146	0.016	3.32524e-06	2 SYNM
KCNH8	9.07606e-11	0.392527	0.171	0.021	3.38238e-06	2 SYNM
ZNF710-AS1	1.06273e-10	0.283466	0.146	0.016	3.96046e-06	2 SYNM
GRK2	1.24181e-10	0.467776	0.195	0.027	4.62787e-06	2 SYNM
TRIM16	1.26006e-10	0.421234	0.195	0.028	4.69586e-06	2 SYNM
DNAJC9	1.28112e-10	0.588666	0.293	0.056	4.77435e-06	2 SYNM
RABL6	1.34032e-10	0.370065	0.293	0.055	4.99499e-06	2 SYNM
ADGRB2	1.38003e-10	0.466715	0.268	0.048	5.14297e-06	2 SYNM
HBP1	1.62051e-10	0.309208	0.293	0.055	6.03916e-06	2 SYNM
B3GNT7	1.65248e-10	0.506877	0.171	0.022	6.15829e-06	2 SYNM
TNK2.1	1.80824e-10	0.407935	0.415	0.099	6.73876e-06	2 SYNM
FOXO6	1.85813e-10	0.366874	0.122	0.012	6.92469e-06	2 SYNM
ISY1	1.91227e-10	0.421817	0.293	0.057	7.12647e-06	2 SYNM
LRIG2	1.98207e-10	0.348792	0.22	0.034	7.38656e-06	2 SYNM
USP22	1.99811e-10	0.614173	0.659	0.225	7.44637e-06	2 SYNM
CLDND1	2.21195e-10	0.54436	0.561	0.165	8.24329e-06	2 SYNM
PHYHIPL	2.22499e-10	0.562448	0.463	0.124	8.29185e-06	2 SYNM
DTL	2.77317e-10	0.365936	0.195	0.028	1.03348e-05	2 SYNM
MTA2	3.26822e-10	0.487965	0.293	0.058	1.21797e-05	2 SYNM
NUPL2	3.45122e-10	0.338532	0.415	0.1	1.28617e-05	2 SYNM
DOT1L	3.61637e-10	0.5921	0.293	0.059	1.34771e-05	2 SYNM
TMCC1-AS1	3.81623e-10	0.360528	0.171	0.022	1.42219e-05	2 SYNM
FAM219A	4.19952e-10	0.527141	0.293	0.058	1.56504e-05	2 SYNM
THUMPD3-AS1	4.29907e-10	0.483637	0.366	0.082	1.60214e-05	2 SYNM
ZNF469	4.41346e-10	0.879314	0.122	0.012	1.64476e-05	2 SYNM
WDR11	4.4601e-10	0.435824	0.22	0.035	1.66215e-05	2 SYNM
PDE2A	4.76007e-10	0.456057	0.146	0.017	1.77394e-05	2 SYNM
TNS3	4.98092e-10	0.903998	0.317	0.07	1.85624e-05	2 SYNM
HOXD9	5.67907e-10	0.448259	0.146	0.017	2.11642e-05	2 SYNM
TP53I11	5.7917e-10	0.405444	0.171	0.023	2.15839e-05	2 SYNM
MYO5A	5.85173e-10	0.680627	0.317	0.068	2.18076e-05	2 SYNM
MUC20-OT1	6.05165e-10	0.531004	0.317	0.068	2.25527e-05	2 SYNM
SEC24C	6.21837e-10	0.28165	0.268	0.05	2.3174e-05	2 SYNM
PIP4K2A	6.75713e-10	0.504838	0.22	0.036	2.51818e-05	2 SYNM
RALGDS	7.11881e-10	0.532747	0.293	0.06	2.65297e-05	2 SYNM
BLMH	7.17471e-10	0.403863	0.293	0.058	2.6738e-05	2 SYNM
RND2	7.23064e-10	0.845421	0.439	0.125	2.69464e-05	2 SYNM
MOG	8.48206e-10	0.437325	0.122	0.013	3.16101e-05	2 SYNM
LGI3	8.57428e-10	0.270596	0.122	0.012	3.19538e-05	2 SYNM
CSGALNACT2	9.36528e-10	0.272907	0.195	0.029	3.49016e-05	2 SYNM
COMMD3	9.48057e-10	0.601547	0.39	0.098	3.53312e-05	2 SYNM
CHADL	9.97413e-10	0.54946	0.195	0.03	3.71706e-05	2 SYNM
ZNF121	1.02613e-09	0.576263	0.293	0.061	3.82408e-05	2 SYNM
LBH	1.03275e-09	0.519803	0.317	0.068	3.84876e-05	2 SYNM
MAPK8IP3	1.05862e-09	0.454193	0.293	0.06	3.94518e-05	2 SYNM
PLPPR1.1	1.16852e-09	0.593426	0.39	0.096	4.35473e-05	2 SYNM
EMSY	1.23467e-09	0.447418	0.195	0.03	4.60124e-05	2 SYNM
CHTF18	1.24211e-09	0.361717	0.244	0.044	4.62898e-05	2 SYNM
FEN1	1.28975e-09	0.642149	0.317	0.07	4.8065e-05	2 SYNM
FAM13C	1.35098e-09	0.50808	0.195	0.03	5.0347e-05	2 SYNM
LRCH3	1.94518e-09	0.526449	0.293	0.061	7.24909e-05	2 SYNM
GPSM1	1.94722e-09	0.390155	0.293	0.061	7.2567e-05	2 SYNM
NTNG2	1.99461e-09	0.790717	0.122	0.013	7.43333e-05	2 SYNM
BNIP3	2.41104e-09	0.745438	0.561	0.192	8.98524e-05	2 SYNM
HNRNPF	2.46199e-09	0.572263	0.512	0.157	9.17512e-05	2 SYNM
RAB33A	2.59736e-09	0.319974	0.268	0.052	9.67958e-05	2 SYNM
NDRG3	2.73887e-09	0.609356	0.341	0.079	0.00010207	2 SYNM
MFSD2A	2.8912e-09	0.528425	0.244	0.046	0.000107746	2 SYNM
NCAPG2	3.53354e-09	0.865758	0.317	0.074	0.000131684	2 SYNM
MAP6D1	3.64947e-09	0.49478	0.22	0.039	0.000136005	2 SYNM
APLP1.1	3.75335e-09	0.62771	0.585	0.207	0.000139876	2 SYNM
KCNIP2	3.82357e-09	0.704198	0.195	0.032	0.000142493	2 SYNM
PHLDB1	4.17348e-09	0.572319	0.317	0.072	0.000155533	2 SYNM
POLR3E	4.44927e-09	0.412746	0.268	0.054	0.000165811	2 SYNM
CA10	5.07894e-09	0.521658	0.22	0.039	0.000189277	2 SYNM
FIBIN	5.46848e-09	0.791293	0.512	0.163	0.000203794	2 SYNM
CCSER2	5.47829e-09	0.351789	0.244	0.046	0.000204159	2 SYNM
RCC2.1	5.6157e-09	0.715321	0.537	0.183	0.00020928	2 SYNM
ING2	5.68246e-09	0.399219	0.366	0.092	0.000211768	2 SYNM
NSD1	5.8404e-09	0.665407	0.244	0.048	0.000217654	2 SYNM
FAM107B	6.99344e-09	0.257665	0.244	0.046	0.000260624	2 SYNM
PIGM	7.96033e-09	0.400821	0.171	0.026	0.000296658	2 SYNM
SLC22A23	8.58284e-09	0.469565	0.195	0.033	0.000319857	2 SYNM
PRKCE	9.21261e-09	0.376131	0.171	0.026	0.000343327	2 SYNM
ENC1	9.32959e-09	0.757279	0.317	0.076	0.000347686	2 SYNM
LIMD1	9.90874e-09	0.479089	0.244	0.048	0.000369269	2 SYNM
RBSN	1.06626e-08	0.468742	0.39	0.105	0.000397363	2 SYNM
FAM204A	1.07998e-08	0.658217	0.317	0.077	0.000402477	2 SYNM
MAP6	1.1109e-08	0.655582	0.268	0.059	0.000413998	2 SYNM
POLE	1.1349e-08	0.330689	0.146	0.02	0.000422944	2 SYNM
IPO7	1.22371e-08	0.648777	0.463	0.143	0.00045604	2 SYNM
PGRMC1.1	1.35162e-08	0.612361	0.634	0.238	0.000503709	2 SYNM
PTEN	1.36604e-08	0.414969	0.317	0.075	0.000509082	2 SYNM
NUP43	1.38188e-08	0.453587	0.22	0.041	0.000514985	2 SYNM
MLH1	1.38912e-08	0.588677	0.366	0.096	0.000517682	2 SYNM
SMPD1	1.40528e-08	0.537455	0.268	0.058	0.000523705	2 SYNM
SHISA9	1.45982e-08	0.262521	0.146	0.02	0.000544031	2 SYNM
MMP2	1.4995e-08	0.693443	0.317	0.077	0.000558818	2 SYNM
SHISA4	1.60052e-08	0.695509	0.415	0.12	0.000596466	2 SYNM
CUEDC2	1.6071e-08	0.587517	0.463	0.145	0.000598916	2 SYNM
LHX2	1.69249e-08	0.755447	0.22	0.043	0.00063074	2 SYNM
TMEM206	1.69933e-08	0.629586	0.341	0.087	0.000633289	2 SYNM
NR2C2	1.71287e-08	0.47504	0.268	0.058	0.000638334	2 SYNM
NUDT21	1.72084e-08	0.640041	0.415	0.119	0.000641307	2 SYNM
MEGF11	1.74856e-08	0.348561	0.22	0.041	0.000651637	2 SYNM
KANK1	1.92168e-08	0.338976	0.268	0.057	0.000716153	2 SYNM
UBE3C	2.16218e-08	0.717204	0.341	0.088	0.000805779	2 SYNM
RBPJ	2.36486e-08	0.698414	0.488	0.16	0.000881313	2 SYNM
PIM3	2.38521e-08	0.530375	0.341	0.088	0.000888897	2 SYNM
SFT2D2	2.41674e-08	0.595716	0.317	0.078	0.000900645	2 SYNM
WASF1	2.49276e-08	0.695772	0.341	0.088	0.000928976	2 SYNM
TM9SF3	2.51401e-08	0.611614	0.439	0.134	0.000936897	2 SYNM
RPL36AP13	2.5345e-08	0.4985	0.561	0.191	0.000944534	2 SYNM
SUZ12P1	2.58818e-08	0.355378	0.268	0.058	0.000964536	2 SYNM
LARP6	2.59712e-08	0.419513	0.268	0.059	0.000967868	2 SYNM
WWC1	2.66638e-08	0.334521	0.146	0.021	0.000993681	2 SYNM
HMGA1	2.76924e-08	0.554919	0.463	0.146	0.00103201	2 SYNM
PHF1	2.90308e-08	0.310351	0.293	0.067	0.00108189	2 SYNM
ZNF25	3.2388e-08	0.708839	0.171	0.028	0.001207	2 SYNM
SCRG1.1	3.26696e-08	0.773753	0.78	0.417	0.0012175	2 SYNM
MPZL1	3.28e-08	0.570588	0.366	0.102	0.00122236	2 SYNM
C4orf33	3.31385e-08	0.346019	0.22	0.042	0.00123497	2 SYNM
ERBB3	3.32377e-08	0.304436	0.171	0.027	0.00123867	2 SYNM
MLXIP	3.35614e-08	0.420206	0.244	0.05	0.00125073	2 SYNM
POLL	3.39077e-08	0.418088	0.171	0.027	0.00126364	2 SYNM
BRSK2	3.41179e-08	0.40686	0.244	0.049	0.00127147	2 SYNM
FAM241B	3.4649e-08	0.340955	0.146	0.021	0.00129126	2 SYNM
CHD3	3.54257e-08	0.572457	0.268	0.06	0.00132021	2 SYNM
POMT1	3.54359e-08	0.410314	0.244	0.05	0.00132059	2 SYNM
GSN.1	3.62211e-08	0.554642	0.293	0.07	0.00134985	2 SYNM
SIRT6	3.62382e-08	0.348593	0.22	0.042	0.00135049	2 SYNM
RAP2A	3.79553e-08	0.695186	0.415	0.126	0.00141448	2 SYNM
THY1	3.92306e-08	0.640267	0.463	0.147	0.00146201	2 SYNM
NAA50	4.28995e-08	0.65622	0.317	0.08	0.00159874	2 SYNM
GLTP	4.294e-08	0.430131	0.39	0.11	0.00160024	2 SYNM
MAPRE3	4.32739e-08	0.465637	0.244	0.052	0.00161269	2 SYNM
ZNF629	4.41966e-08	0.254015	0.22	0.042	0.00164707	2 SYNM
FYN	4.5201e-08	0.936905	0.585	0.256	0.0016845	2 SYNM
ZNF439	4.82153e-08	0.314197	0.171	0.028	0.00179684	2 SYNM
SRPRB	5.11565e-08	0.499785	0.415	0.125	0.00190645	2 SYNM
ADCY6	5.19991e-08	0.298665	0.195	0.035	0.00193785	2 SYNM
ILF3	5.34588e-08	0.706506	0.634	0.267	0.00199225	2 SYNM
CUL2	5.45664e-08	0.325173	0.171	0.028	0.00203353	2 SYNM
FRMD4A	5.74962e-08	0.783759	0.244	0.052	0.00214271	2 SYNM
SBF1	5.75368e-08	0.480881	0.293	0.07	0.00214422	2 SYNM
SYNDIG1	6.00565e-08	0.287516	0.122	0.015	0.00223812	2 SYNM
ASB1	6.5184e-08	0.315044	0.22	0.043	0.00242921	2 SYNM
CCNL2	7.30625e-08	0.557174	0.439	0.133	0.00272282	2 SYNM
NSMCE4A	7.53056e-08	0.621115	0.268	0.063	0.00280642	2 SYNM
PSMD2.1	7.61196e-08	0.691683	0.707	0.326	0.00283675	2 SYNM
PIDD1	8.62776e-08	0.307152	0.171	0.028	0.00321531	2 SYNM
HIP1R	8.66305e-08	0.497286	0.268	0.062	0.00322846	2 SYNM
AMOTL2	9.14412e-08	0.530955	0.293	0.071	0.00340774	2 SYNM
CASP2	9.15217e-08	0.582276	0.293	0.073	0.00341074	2 SYNM
SNRPN	1.00083e-07	0.687354	0.439	0.14	0.0037298	2 SYNM
PPP1R16B	1.02574e-07	0.568734	0.122	0.016	0.00382262	2 SYNM
DSCAM	1.02925e-07	0.355712	0.293	0.07	0.00383569	2 SYNM
MFSD1	1.04764e-07	0.29333	0.293	0.071	0.00390426	2 SYNM
SLC6A8	1.1008e-07	0.369443	0.415	0.124	0.00410234	2 SYNM
SAR1A	1.12549e-07	0.444113	0.439	0.139	0.00419435	2 SYNM
BTF3L4	1.16596e-07	0.673455	0.537	0.199	0.0043452	2 SYNM
ZNF37BP	1.24345e-07	0.421242	0.195	0.037	0.00463397	2 SYNM
CENPV.1	1.25004e-07	0.610888	0.439	0.143	0.00465852	2 SYNM
AIF1L	1.27777e-07	0.354841	0.366	0.102	0.00476186	2 SYNM
SILC1	1.38827e-07	0.296084	0.171	0.029	0.00517368	2 SYNM
GTPBP8	1.44174e-07	0.28203	0.171	0.029	0.00537293	2 SYNM
RPS24	1.45753e-07	0.720477	0.878	0.598	0.00543178	2 SYNM
UBE2T.1	1.48903e-07	0.499204	0.39	0.116	0.00554918	2 SYNM
LINC00511	1.50163e-07	0.333244	0.244	0.053	0.00559612	2 SYNM
ARHGEF11	1.59933e-07	0.338781	0.146	0.023	0.00596023	2 SYNM
FEM1A	1.64101e-07	0.395242	0.244	0.054	0.00611556	2 SYNM
WASH9P	1.69852e-07	0.329919	0.244	0.054	0.00632989	2 SYNM
NOL4L	1.79836e-07	0.343553	0.195	0.037	0.00670195	2 SYNM
KAZN	1.86857e-07	0.64929	0.268	0.066	0.00696361	2 SYNM
P2RX7	1.87518e-07	0.346781	0.22	0.045	0.00698824	2 SYNM
KCNH2	2.04828e-07	0.262394	0.268	0.062	0.00763332	2 SYNM
RNF112	2.06083e-07	0.563461	0.22	0.046	0.00768009	2 SYNM
ZBTB5	2.17445e-07	0.430804	0.195	0.038	0.00810351	2 SYNM
PPP2R1B	2.22011e-07	0.38776	0.171	0.03	0.00827369	2 SYNM
LUC7L3	2.33308e-07	0.561907	0.683	0.292	0.00869468	2 SYNM
NUP210	2.39977e-07	0.397753	0.22	0.046	0.00894323	2 SYNM
ST3GAL5	2.48576e-07	0.737544	0.439	0.152	0.00926368	2 SYNM
H1FX-AS1	2.59321e-07	0.2801	0.122	0.017	0.00966412	2 SYNM
SOGA1	2.59893e-07	0.495565	0.341	0.095	0.00968544	2 SYNM
NME2	2.7576e-07	0.491838	0.366	0.11	0.0102768	2 SYNM
CHTOP	2.97367e-07	0.609456	0.463	0.161	0.011082	2 SYNM
PITRM1	3.01638e-07	0.30968	0.195	0.038	0.0112411	2 SYNM
CCP110	3.13041e-07	0.434637	0.195	0.039	0.0116661	2 SYNM
UGT8	3.31138e-07	0.730101	0.22	0.049	0.0123405	2 SYNM
CCDC159	3.41888e-07	0.500845	0.195	0.039	0.0127411	2 SYNM
NUMA1	3.49907e-07	0.367073	0.537	0.191	0.01304	2 SYNM
TMTC4	3.72273e-07	0.325835	0.195	0.039	0.0138735	2 SYNM
SLC12A6	3.77243e-07	0.587175	0.171	0.031	0.0140587	2 SYNM
SEL1L3	3.80826e-07	0.330956	0.171	0.031	0.0141922	2 SYNM
TMEM259	4.03605e-07	0.615811	0.415	0.139	0.0150412	2 SYNM
XPNPEP1	4.10588e-07	0.592693	0.317	0.089	0.0153014	2 SYNM
BNIP1	4.26217e-07	0.461375	0.22	0.048	0.0158838	2 SYNM
SCRIB	4.28982e-07	0.455324	0.317	0.088	0.0159869	2 SYNM
COPG1	4.36741e-07	0.521591	0.341	0.099	0.016276	2 SYNM
REPIN1	4.37035e-07	0.4826	0.463	0.155	0.016287	2 SYNM
MICAL1	4.49827e-07	0.26259	0.195	0.039	0.0167637	2 SYNM
PMP2.1	4.57803e-07	0.380039	0.537	0.192	0.0170609	2 SYNM
SGCE	4.7512e-07	0.55632	0.268	0.068	0.0177063	2 SYNM
LENG8	5.06653e-07	0.594975	0.317	0.092	0.0188814	2 SYNM
RRM1	5.10982e-07	0.447334	0.341	0.098	0.0190427	2 SYNM
EIF3B	5.13979e-07	0.574182	0.488	0.177	0.0191545	2 SYNM
SCARB1	5.15391e-07	0.450913	0.268	0.068	0.0192071	2 SYNM
BRPF1	5.1756e-07	0.262087	0.171	0.031	0.0192879	2 SYNM
PDHB	5.21347e-07	0.431337	0.537	0.195	0.0194291	2 SYNM
PRPSAP2	5.53864e-07	0.260419	0.341	0.094	0.0206408	2 SYNM
GRIA2.1	5.85393e-07	0.675888	0.512	0.194	0.0218158	2 SYNM
FAM24B	5.93583e-07	0.356614	0.122	0.018	0.0221211	2 SYNM
KHDC4	6.28862e-07	0.361833	0.22	0.048	0.0234358	2 SYNM
ARPC4	6.32215e-07	0.525487	0.585	0.237	0.0235607	2 SYNM
EBF4	6.44101e-07	0.395059	0.195	0.04	0.0240037	2 SYNM
UFSP2	6.69816e-07	0.445727	0.22	0.049	0.024962	2 SYNM
SORCS3	6.80099e-07	0.350383	0.146	0.024	0.0253453	2 SYNM
FUT11	6.91094e-07	0.487173	0.146	0.025	0.025755	2 SYNM
U2SURP	7.1241e-07	0.37945	0.439	0.148	0.0265494	2 SYNM
PDLIM7	7.15228e-07	0.437612	0.22	0.049	0.0266544	2 SYNM
DOK1	7.85855e-07	0.435714	0.146	0.025	0.0292865	2 SYNM
FSD1	8.00282e-07	0.381371	0.244	0.058	0.0298241	2 SYNM
DNM3	8.03259e-07	0.527081	0.195	0.042	0.029935	2 SYNM
C1QL1	8.19024e-07	0.431027	0.268	0.067	0.0305226	2 SYNM
FASN	8.20216e-07	0.438979	0.341	0.099	0.030567	2 SYNM
ZMYND8	8.32313e-07	0.492211	0.415	0.141	0.0310178	2 SYNM
CPNE1	8.34856e-07	0.620727	0.439	0.16	0.0311126	2 SYNM
HIST2H2AA4	8.44309e-07	0.40269	0.293	0.078	0.0314649	2 SYNM
MORF4L2	8.66153e-07	0.591058	0.61	0.256	0.0322789	2 SYNM
MIS18A	8.7456e-07	0.347899	0.244	0.059	0.0325922	2 SYNM
EMC3	9.46891e-07	0.508815	0.463	0.162	0.0352878	2 SYNM
EEF1AKMT2	9.67527e-07	0.312695	0.171	0.032	0.0360568	2 SYNM
ANLN	9.77118e-07	0.352594	0.22	0.049	0.0364142	2 SYNM
NRXN2.1	9.99462e-07	0.358616	0.488	0.173	0.037247	2 SYNM
SNX22	1.00809e-06	0.447482	0.268	0.071	0.0375686	2 SYNM
CNP	1.01694e-06	1.1176	0.585	0.289	0.0378985	2 SYNM
MCMBP	1.02445e-06	0.488413	0.244	0.06	0.0381783	2 SYNM
ZNF621	1.05145e-06	0.48765	0.244	0.059	0.0391842	2 SYNM
SNX18	1.0939e-06	0.397193	0.195	0.041	0.0407664	2 SYNM
ATG3	1.1171e-06	0.542009	0.415	0.141	0.0416308	2 SYNM
TRIR	1.1222e-06	0.537041	0.78	0.35	0.0418212	2 SYNM
FAM111B	1.12391e-06	0.400482	0.146	0.025	0.0418847	2 SYNM
SFPQ.1	1.16976e-06	0.63387	0.732	0.372	0.0435936	2 SYNM
HERC1	1.22298e-06	0.428792	0.195	0.041	0.0455767	2 SYNM
BMPER	1.22955e-06	0.517042	0.146	0.026	0.0458218	2 SYNM
CLUH	1.24482e-06	0.306105	0.22	0.05	0.0463908	2 SYNM
NAT9	1.30971e-06	0.464977	0.171	0.033	0.0488089	2 SYNM
PPP2R2A	1.31257e-06	0.400409	0.366	0.114	0.0489155	2 SYNM
TTC14	1.32078e-06	0.270876	0.317	0.089	0.0492213	2 SYNM
GYG1	1.33891e-06	0.543145	0.341	0.104	0.0498972	2 SYNM
PLXNA3	1.38802e-06	0.505757	0.22	0.051	0.0517274	2
TM4SF1	1.40151e-06	0.43198	0.244	0.06	0.0522302	2
ACVR2A	1.53464e-06	0.40173	0.195	0.042	0.0571916	2
STIP1	1.56777e-06	0.460577	0.463	0.169	0.058426	2
DDX51	1.57711e-06	0.320359	0.195	0.042	0.0587742	2
ERCC3	1.61133e-06	0.346524	0.244	0.06	0.0600493	2
BCAN.1	1.69458e-06	0.84093	0.756	0.486	0.0631518	2
GABPB1-AS1	1.6982e-06	0.399307	0.293	0.081	0.063287	2
XRN1	1.75637e-06	0.553921	0.22	0.052	0.0654547	2
DOLPP1	1.75763e-06	0.363542	0.171	0.034	0.0655015	2
ZBED5	1.77046e-06	0.650042	0.366	0.121	0.0659797	2
SHCBP1	1.78267e-06	0.362171	0.195	0.042	0.0664348	2
TAF11	1.78855e-06	0.363516	0.293	0.08	0.066654	2
ENO2	1.80211e-06	0.578485	0.659	0.301	0.0671593	2
RHOQ	1.83827e-06	0.385627	0.317	0.092	0.0685067	2
CDC45	1.89056e-06	0.384618	0.171	0.034	0.0704554	2
LAS1L	1.92645e-06	0.39368	0.195	0.042	0.0717929	2
SREBF2	2.13658e-06	0.309114	0.244	0.061	0.0796238	2
SHD.1	2.22209e-06	0.70528	0.341	0.108	0.0828107	2
SLIT1.1	2.30484e-06	0.645813	0.415	0.15	0.0858946	2
DONSON	2.31044e-06	0.586471	0.171	0.034	0.0861032	2
NMRAL1	2.31586e-06	0.318985	0.317	0.093	0.0863052	2
GNPAT	2.33157e-06	0.60135	0.341	0.108	0.0868906	2
SF3A2	2.36779e-06	0.532359	0.244	0.063	0.0882405	2
SOX6.1	2.37967e-06	0.705998	0.366	0.121	0.0886832	2
HDHD2	2.38173e-06	0.358881	0.366	0.116	0.0887598	2
B2M.1	2.44164e-06	-1.50952	0.756	0.782	0.0909927	2
FANCI	2.49053e-06	0.450166	0.22	0.053	0.0928145	2
GALNT13	2.593e-06	0.317801	0.195	0.043	0.0966332	2
METTL15	2.59354e-06	0.356026	0.146	0.027	0.0966533	2
CHCHD6	2.65579e-06	0.553995	0.293	0.085	0.0989733	2
FBXO5	2.65653e-06	0.350401	0.195	0.043	0.099001	2
RAP1GAP	2.69197e-06	0.318964	0.146	0.027	0.100321	2
MBP	2.72384e-06	0.475978	0.195	0.044	0.101509	2
CGGBP1	2.75067e-06	0.300616	0.415	0.139	0.102509	2
CIDECP1	2.75174e-06	0.778029	0.171	0.035	0.102549	2
SCN11A	2.80295e-06	-1.36394	0.073	0.468	0.104458	2
TNFRSF21	2.81107e-06	0.874679	0.39	0.137	0.10476	2
APC2	2.85303e-06	0.373052	0.293	0.083	0.106324	2
HACL1	3.08485e-06	0.469839	0.195	0.044	0.114963	2
ELMO2	3.08895e-06	0.596601	0.195	0.044	0.115116	2
FBXO45	3.22945e-06	0.446997	0.22	0.054	0.120352	2
CLCN2	3.24694e-06	0.43	0.171	0.035	0.121004	2
TCF12	3.30166e-06	0.600169	0.512	0.208	0.123043	2
PAXIP1	3.30823e-06	0.34718	0.171	0.035	0.123288	2
SUGP2	3.3265e-06	0.665099	0.439	0.159	0.123969	2
MARVELD1	3.43072e-06	0.426384	0.171	0.035	0.127853	2
MMUT	3.46911e-06	0.36428	0.195	0.044	0.129283	2
EDEM1	3.49631e-06	0.504295	0.244	0.064	0.130297	2
TJAP1	3.49869e-06	0.280727	0.171	0.035	0.130386	2
SMAD2	3.52087e-06	0.57491	0.317	0.099	0.131212	2
KIAA0930	3.52423e-06	0.373028	0.22	0.053	0.131337	2
ZNF100	3.59954e-06	0.323816	0.171	0.035	0.134144	2
BOP1	3.71786e-06	0.363492	0.244	0.062	0.138553	2
DPYSL4	3.74682e-06	0.520372	0.244	0.064	0.139633	2
SGPL1	3.80914e-06	0.370538	0.22	0.054	0.141955	2
WDR6	3.86532e-06	0.387718	0.39	0.132	0.144049	2
GRAMD1A	3.89248e-06	0.502616	0.268	0.074	0.145061	2
POLR2A	4.04442e-06	0.52076	0.341	0.107	0.150723	2
TUBB4B	4.05708e-06	0.648101	0.585	0.276	0.151195	2
CALM1	4.12808e-06	-1.16041	0.488	0.685	0.153841	2
HR	4.14914e-06	0.27368	0.122	0.02	0.154626	2
EIF3F	4.26994e-06	0.591557	0.659	0.313	0.159128	2
TMF1	4.29247e-06	0.295577	0.268	0.073	0.159968	2
SH3RF3	4.34236e-06	0.354305	0.146	0.027	0.161827	2
ERCC5	4.41512e-06	0.319538	0.171	0.035	0.164538	2
ZFR	4.43447e-06	0.470278	0.39	0.135	0.165259	2
CDK9	4.48997e-06	0.26444	0.195	0.044	0.167328	2
RAB4B	4.69032e-06	0.258903	0.22	0.053	0.174794	2
MED23	4.74446e-06	0.353296	0.171	0.036	0.176812	2
RHOT2	4.76641e-06	0.539652	0.317	0.097	0.17763	2
TECPR1	4.82699e-06	0.281527	0.244	0.064	0.179888	2
QTRT1	4.94657e-06	0.284084	0.268	0.073	0.184344	2
ARHGAP39	4.97658e-06	0.343049	0.146	0.028	0.185462	2
TSR2	5.14999e-06	0.261575	0.317	0.096	0.191925	2
TRAPPC13	5.18079e-06	0.277535	0.171	0.035	0.193073	2
RAB8B	5.26666e-06	0.531886	0.195	0.045	0.196273	2
PNISR	5.3241e-06	0.336648	0.561	0.228	0.198413	2
EZH2	5.35943e-06	0.443998	0.293	0.088	0.19973	2
CDC42SE1	5.36968e-06	0.678648	0.439	0.177	0.200112	2
XPO6	5.42805e-06	0.371919	0.293	0.087	0.202287	2
TUBGCP2	5.44797e-06	0.471346	0.244	0.066	0.20303	2
NDUFAF6	5.65319e-06	0.368979	0.22	0.054	0.210678	2
OGT	5.68984e-06	0.358087	0.317	0.098	0.212043	2
PLEC	5.7764e-06	0.352524	0.244	0.065	0.215269	2
MAPKAPK5	5.84668e-06	0.32789	0.268	0.074	0.217888	2
PCLAF	5.93309e-06	0.522879	0.293	0.088	0.221108	2
CCDC14	5.94628e-06	0.501248	0.268	0.077	0.2216	2
CSNK1D	5.98932e-06	0.253129	0.341	0.108	0.223204	2
CKB.1	6.20964e-06	-1.17378	0.61	0.721	0.231415	2
MORC2	6.389e-06	0.266876	0.195	0.045	0.238099	2
PADI2	6.6367e-06	0.444953	0.146	0.028	0.24733	2
PLPPR2	6.6466e-06	0.396573	0.244	0.065	0.247699	2
SV2A	6.74862e-06	0.342264	0.39	0.135	0.251501	2
ING3	6.79626e-06	0.465257	0.293	0.089	0.253276	2
MTERF1	6.879e-06	0.566642	0.122	0.021	0.25636	2
GLUD1	7.06369e-06	0.266786	0.317	0.097	0.263242	2
WWC3	7.11706e-06	0.364735	0.146	0.028	0.265231	2
TALDO1	7.18791e-06	0.558536	0.537	0.24	0.267872	2
PMPCB	7.2945e-06	0.374922	0.39	0.135	0.271844	2
UBR3	7.60939e-06	0.395634	0.244	0.066	0.283579	2
PPP1R2	7.81218e-06	0.444548	0.317	0.099	0.291137	2
RAB5IF	8.11136e-06	0.512612	0.488	0.198	0.302286	2
DCBLD2	8.2011e-06	0.381816	0.195	0.047	0.30563	2
FAM193B	8.4141e-06	0.299723	0.171	0.037	0.313568	2
SLF2	8.60752e-06	0.269138	0.22	0.054	0.320776	2
WDR5	8.61471e-06	0.269167	0.22	0.055	0.321044	2
CUEDC1	8.61939e-06	0.409545	0.195	0.047	0.321219	2
CST3.1	8.69747e-06	-1.0452	0.512	0.676	0.324129	2
NPIPP1	8.94188e-06	0.325265	0.317	0.098	0.333237	2
CYTL1	8.96821e-06	0.430603	0.317	0.098	0.334218	2
RPN1	9.17352e-06	0.527217	0.537	0.234	0.34187	2
SBNO1	9.30863e-06	0.761745	0.268	0.08	0.346905	2
TCEAL8	9.34079e-06	0.310885	0.366	0.124	0.348103	2
EIF4A1P4	9.36376e-06	0.281728	0.341	0.111	0.348959	2
CUL9	9.44187e-06	0.481358	0.171	0.037	0.35187	2
CRYGS	9.60177e-06	0.429984	0.122	0.021	0.357829	2
SMPD4	9.73913e-06	0.309492	0.171	0.038	0.362948	2
HACD2	9.94781e-06	0.339452	0.244	0.067	0.370725	2
TMSB4X	1.00972e-05	-0.574977	0.976	0.929	0.376293	2
TAF1C	1.01016e-05	0.482581	0.171	0.038	0.376454	2
CLU.1	1.01716e-05	-1.90193	0.293	0.569	0.379063	2
SRGAP2	1.02393e-05	0.329326	0.22	0.056	0.381587	2
H1FX	1.02916e-05	0.589091	0.561	0.262	0.383538	2
RABGGTB	1.03547e-05	0.565536	0.293	0.092	0.385887	2
NF2	1.0549e-05	0.341634	0.244	0.067	0.393128	2
TAF1D	1.06373e-05	0.339219	0.39	0.139	0.396421	2
TMEM132B	1.07394e-05	0.372796	0.293	0.089	0.400224	2
TSC1	1.09912e-05	0.460293	0.268	0.078	0.40961	2
SUMF2	1.10361e-05	-1.13262	0.146	0.476	0.411282	2
PRRC2B	1.11774e-05	0.369833	0.415	0.153	0.416547	2
L1CAM	1.12271e-05	0.260029	0.146	0.029	0.418401	2
GRIK5	1.12434e-05	0.327252	0.171	0.038	0.419007	2
WASHC1	1.12836e-05	0.393977	0.195	0.048	0.420507	2
TMEM181	1.23394e-05	0.324675	0.268	0.078	0.459854	2
EIF4A1P2	1.24074e-05	0.28554	0.244	0.067	0.462388	2
DTYMK	1.27024e-05	0.475234	0.463	0.188	0.473381	2
ABCC5	1.27878e-05	0.386592	0.268	0.079	0.476565	2
COP1	1.2896e-05	0.373003	0.171	0.038	0.480597	2
SS18L1	1.3026e-05	0.375121	0.244	0.068	0.48544	2
ZNF207	1.34338e-05	0.395539	0.415	0.156	0.500638	2
GSTO1	1.3446e-05	0.253452	0.293	0.089	0.501091	2
FDFT1	1.3841e-05	0.557262	0.439	0.174	0.515813	2
WBP2	1.39804e-05	0.499206	0.415	0.158	0.521007	2
UPF2	1.41571e-05	0.376977	0.171	0.039	0.527593	2
RAB11B	1.41956e-05	0.455176	0.415	0.158	0.529028	2
RASA2	1.4603e-05	0.295819	0.122	0.022	0.544209	2
RUFY3	1.47753e-05	0.512667	0.463	0.187	0.550631	2
ANKLE2	1.55934e-05	0.408169	0.268	0.08	0.581118	2
RPL7A.1	1.58673e-05	0.444462	0.878	0.605	0.591328	2
PPIF	1.6409e-05	0.342898	0.244	0.067	0.611515	2
HNRNPL	1.66335e-05	0.501374	0.634	0.318	0.619879	2
BEX1.1	1.67162e-05	0.521422	0.732	0.384	0.622963	2
FSCN1	1.68469e-05	0.633929	0.585	0.277	0.627834	2
DPH3	1.74076e-05	0.326435	0.244	0.07	0.648729	2
WIPI2	1.75915e-05	0.436611	0.415	0.16	0.655581	2
ZNF263	1.84826e-05	0.347518	0.171	0.039	0.688789	2
UBE2M	1.91082e-05	0.365826	0.415	0.157	0.712106	2
CTDSPL2	1.9465e-05	0.416668	0.22	0.059	0.725402	2
PSAP	1.9476e-05	0.446559	0.756	0.422	0.72581	2
TENT4A	1.94934e-05	0.482292	0.171	0.039	0.72646	2
SORD	2.04007e-05	0.289459	0.122	0.022	0.760273	2
CYP2U1	2.07852e-05	0.372064	0.195	0.049	0.774603	2
CNEP1R1	2.09438e-05	0.331307	0.146	0.03	0.780511	2
NOSIP	2.10571e-05	0.447642	0.341	0.116	0.784735	2
YEATS2	2.18416e-05	0.328484	0.341	0.111	0.81397	2
GNPDA2	2.19195e-05	0.283348	0.171	0.039	0.816872	2
ZNF48	2.29102e-05	0.266802	0.171	0.039	0.853793	2
PPP5C	2.30287e-05	0.341183	0.268	0.082	0.858211	2
FOXD3-AS1	2.4394e-05	0.341818	0.171	0.04	0.909092	2
ZNF512B	2.46878e-05	0.346448	0.171	0.04	0.920041	2
MICOS10P3	2.49939e-05	0.32396	0.293	0.094	0.931448	2
SND1	2.5429e-05	0.579777	0.293	0.097	0.947661	2
DLG5	2.5596e-05	0.334164	0.293	0.094	0.953886	2
FGD5-AS1	2.62147e-05	0.514784	0.512	0.229	0.976942	2
PPDPFL	2.63377e-05	0.804443	0.171	0.039	0.981526	2
SLC25A16	2.65725e-05	0.323914	0.146	0.031	0.990277	2
TRAPPC6A	2.66364e-05	0.405481	0.22	0.061	0.99266	2
RPS29	2.6726e-05	-0.541969	0.829	0.865	0.996	2
SRP14P2	2.70605e-05	0.386211	0.244	0.071	1	2
FTH1	2.81054e-05	-0.558481	0.976	0.962	1	2
PARP4	2.81266e-05	0.28143	0.244	0.07	1	2
KIF21A	2.82769e-05	0.373694	0.463	0.185	1	2
CADM4	2.86028e-05	0.517028	0.463	0.201	1	2
HRASLS	2.94273e-05	0.628008	0.244	0.073	1	2
ZNF83	3.03186e-05	0.423108	0.22	0.062	1	2
EGLN2	3.08713e-05	0.421437	0.22	0.061	1	2
ACLY	3.09427e-05	0.428948	0.415	0.162	1	2
RPL26P6	3.19456e-05	0.483712	0.683	0.364	1	2
KIF18B	3.28428e-05	0.476167	0.146	0.032	1	2
GGA1	3.30798e-05	0.639801	0.244	0.074	1	2
BUB1B	3.3146e-05	0.469442	0.195	0.051	1	2
SLC35A5	3.32547e-05	0.269628	0.22	0.06	1	2
SNHG6.1	3.34224e-05	0.601234	0.707	0.414	1	2
PIP4K2B	3.37962e-05	0.431459	0.293	0.095	1	2
2002-09-01	3.42977e-05	0.409345	0.683	0.347	1	2
TIAL1	3.52402e-05	0.622122	0.341	0.132	1	2
SGK1.1	3.53435e-05	0.410956	0.293	0.095	1	2
ETF1	3.64192e-05	0.461142	0.317	0.108	1	2
GRK4	3.68547e-05	0.29696	0.171	0.041	1	2
TMEM198B	3.88941e-05	0.282342	0.171	0.041	1	2
NCAM1.1	3.9243e-05	0.572028	0.683	0.392	1	2
TASOR	3.94803e-05	0.265686	0.244	0.071	1	2
CAPRIN1	4.01403e-05	0.47392	0.463	0.183	1	2
C11orf58	4.04826e-05	0.464662	0.585	0.29	1	2
PDZRN3	4.13176e-05	0.340215	0.22	0.061	1	2
RPL24P4	4.34034e-05	0.410022	0.732	0.376	1	2
SNRNP70	4.40539e-05	0.488702	0.512	0.242	1	2
ANAPC15	4.51167e-05	0.258857	0.268	0.083	1	2
LINC00205	4.51181e-05	0.30154	0.122	0.024	1	2
PJA1.1	4.54088e-05	0.356783	0.366	0.135	1	2
UBA3	4.55411e-05	0.267615	0.317	0.109	1	2
COQ10B	4.60866e-05	0.593055	0.195	0.052	1	2
MARCKSL1.1	4.61142e-05	0.440358	0.854	0.531	1	2
FAF2	4.62781e-05	0.38093	0.22	0.062	1	2
TBKBP1	4.66886e-05	0.473864	0.122	0.024	1	2
GRINA	4.78465e-05	0.534315	0.512	0.238	1	2
CTNNB1	4.87022e-05	0.442468	0.756	0.423	1	2
EPHB2	4.89083e-05	0.300273	0.195	0.05	1	2
FBXW5	4.95347e-05	0.407458	0.317	0.111	1	2
PSMD11	5.20158e-05	0.403395	0.488	0.209	1	2
ADO	5.23211e-05	0.364727	0.171	0.042	1	2
2010-09-01	5.31322e-05	0.443427	0.171	0.042	1	2
EPM2AIP1	5.37551e-05	0.506688	0.317	0.114	1	2
TMEM189	5.40393e-05	0.410868	0.22	0.062	1	2
MPV17L	5.4876e-05	0.339443	0.171	0.042	1	2
DPY19L4	5.52265e-05	0.280925	0.195	0.052	1	2
ARGLU1	5.60632e-05	0.489994	0.512	0.236	1	2
BOD1L1	5.61481e-05	0.370737	0.22	0.063	1	2
EPC1	5.62696e-05	0.334989	0.22	0.062	1	2
PSMD13	5.76978e-05	0.400496	0.512	0.23	1	2
PDXDC1	5.78026e-05	0.413421	0.293	0.1	1	2
HMOX2	5.8089e-05	0.341538	0.244	0.073	1	2
INPPL1	5.83032e-05	0.304062	0.195	0.053	1	2
GUCY1B1	5.8972e-05	0.34702	0.122	0.024	1	2
VPS26A	5.94044e-05	0.392669	0.195	0.054	1	2
CDC123	6.04003e-05	0.317045	0.268	0.086	1	2
ANAPC1	6.32531e-05	0.359393	0.146	0.033	1	2
PAQR3	6.3903e-05	0.318048	0.171	0.043	1	2
LRRN1.1	6.46103e-05	0.43864	0.415	0.169	1	2
PFDN6	6.53846e-05	0.326942	0.39	0.148	1	2
PTPRS.1	6.81449e-05	0.505423	0.561	0.274	1	2
MLF2	6.85664e-05	0.42537	0.61	0.311	1	2
EGFR	6.8811e-05	-1.32686	0.171	0.468	1	2
NCAPD2	6.98873e-05	0.303722	0.195	0.053	1	2
RPL24	6.99978e-05	0.413138	0.927	0.705	1	2
WDR48	7.04215e-05	0.393838	0.195	0.053	1	2
RPS19	7.12806e-05	-0.502396	0.976	0.922	1	2
SAP30L	7.15272e-05	0.325644	0.22	0.064	1	2
KLF10	7.15988e-05	0.926205	0.22	0.066	1	2
KIF1A	7.21682e-05	0.303573	0.22	0.064	1	2
MCF2L	7.23119e-05	0.42053	0.146	0.034	1	2
TMCC3	7.35343e-05	0.333217	0.122	0.025	1	2
RCC1	7.51994e-05	0.280745	0.171	0.042	1	2
ATP6V0A2	7.58834e-05	0.663405	0.195	0.054	1	2
RICTOR	7.71734e-05	0.294918	0.195	0.053	1	2
ATRNL1	7.76034e-05	0.350744	0.122	0.025	1	2
COG3	7.7648e-05	0.332558	0.171	0.043	1	2
STK32A	7.7758e-05	0.359391	0.244	0.075	1	2
PPP4R2	7.7946e-05	0.371994	0.268	0.089	1	2
CENPX	7.80087e-05	0.329657	0.537	0.235	1	2
MAP1A	7.87227e-05	0.258831	0.293	0.099	1	2
FTH1P3	7.98181e-05	-1.22907	0.146	0.429	1	2
PLAA	8.05082e-05	0.37083	0.195	0.053	1	2
PSMD3	8.12105e-05	0.484971	0.463	0.207	1	2
MT3.1	8.15173e-05	-1.63767	0.61	0.663	1	2
MDM2.1	8.1964e-05	-2.07648	0.049	0.34	1	2
CNBP	8.26337e-05	0.314195	0.756	0.391	1	2
RPRM	8.27723e-05	0.529772	0.171	0.043	1	2
AGFG1	8.32913e-05	0.258846	0.268	0.088	1	2
PRPF8	8.3921e-05	0.58264	0.366	0.146	1	2
SMAP2	8.42816e-05	0.300813	0.268	0.088	1	2
RTL8C	8.52845e-05	0.419077	0.561	0.262	1	2
HSPE1P2	8.53479e-05	0.490996	0.61	0.323	1	2
CHFR	8.85532e-05	0.576788	0.171	0.044	1	2
FADS2	8.86964e-05	0.327516	0.512	0.231	1	2
ELAVL1	8.90275e-05	0.309068	0.366	0.14	1	2
FAM53C	8.92423e-05	0.400245	0.195	0.054	1	2
PAFAH1B1	8.97808e-05	0.455635	0.585	0.284	1	2
ZSWIM8	9.05404e-05	0.301335	0.122	0.025	1	2
HACD3	9.12847e-05	0.592285	0.366	0.142	1	2
LHFPL4	9.26691e-05	0.668833	0.171	0.044	1	2
CCDC106	9.27821e-05	0.256072	0.195	0.054	1	2
MKI67	9.29083e-05	0.353902	0.195	0.054	1	2
DROSHA	9.4968e-05	0.37084	0.244	0.078	1	2
HNRNPK	9.62775e-05	0.413101	0.902	0.632	1	2
RASSF4.1	9.65379e-05	0.374421	0.366	0.141	1	2
STK25	9.89488e-05	0.314517	0.39	0.154	1	2
HARS	9.93538e-05	0.2977	0.268	0.089	1	2
RAB7A	9.93794e-05	0.559723	0.537	0.274	1	2
ATP1B1.1	0.000100046	0.469692	0.39	0.156	1	2
HNRNPA0.1	0.000101344	0.392023	0.61	0.307	1	2
SLC25A1	0.000101413	0.376888	0.268	0.09	1	2
FKTN	0.000101811	0.265739	0.146	0.034	1	2
MT-CYB	0.000102408	0.412806	0.561	0.264	1	2
PAFAH1B3.1	0.000105263	0.416151	0.61	0.302	1	2
CBR3	0.0001057	0.301684	0.146	0.034	1	2
PLEKHA1	0.000106337	0.49315	0.146	0.035	1	2
ATG13	0.000106558	0.394889	0.171	0.045	1	2
MFSD6	0.000108349	0.315919	0.171	0.044	1	2
INTS7	0.000109565	0.281834	0.146	0.034	1	2
HERC4	0.000110162	0.2629	0.146	0.034	1	2
SCAMP4	0.000111914	0.72263	0.195	0.057	1	2
PSMD4	0.000112206	0.605797	0.537	0.267	1	2
GLRX3	0.000112319	0.451262	0.244	0.079	1	2
MAZ	0.000113137	0.439006	0.39	0.165	1	2
SRSF6	0.000113511	0.324418	0.488	0.223	1	2
HLA-C.1	0.000114025	-1.1846	0.317	0.539	1	2
ARHGEF4	0.000114277	0.289696	0.122	0.025	1	2
EHD1	0.000115635	0.336279	0.171	0.045	1	2
TMPRSS5	0.000117023	0.3459	0.146	0.035	1	2
TECR	0.000119772	0.3334	0.439	0.187	1	2
RAB11FIP3	0.00012075	0.278419	0.195	0.055	1	2
IFI6	0.000121631	-1.81348	0.195	0.465	1	2
ULK1	0.0001218	0.318832	0.146	0.035	1	2
GOSR2	0.000121984	0.367772	0.195	0.055	1	2
EPB41L2	0.000123682	0.444978	0.293	0.104	1	2
XRCC5	0.000123693	0.456025	0.512	0.24	1	2
SMNDC1	0.000123807	0.290088	0.22	0.066	1	2
EIF3FP3	0.000123994	0.368471	0.268	0.09	1	2
FRMD8	0.000124821	0.296145	0.171	0.045	1	2
PSPC1	0.000125025	0.360954	0.268	0.093	1	2
SNHG25	0.000127723	0.411587	0.463	0.2	1	2
CDV3	0.000129024	0.47962	0.39	0.159	1	2
WDR26	0.000129105	0.433053	0.268	0.092	1	2
UBL7	0.000129415	0.692715	0.22	0.068	1	2
USP54	0.000133105	0.319299	0.146	0.035	1	2
CLASP2.1	0.000134529	0.525914	0.439	0.192	1	2
GOLGA8A	0.000139939	0.325182	0.195	0.056	1	2
TM7SF3	0.000141951	0.474579	0.195	0.057	1	2
CDK11B	0.000142026	0.388608	0.39	0.156	1	2
TMEM30A	0.000142432	0.477215	0.512	0.234	1	2
MAPK9	0.000142619	0.260116	0.244	0.078	1	2
RNF144A	0.000148666	0.325497	0.171	0.046	1	2
ATP1A3	0.000149277	0.298975	0.244	0.078	1	2
RCE1	0.000150097	0.35473	0.122	0.027	1	2
PHF20L1	0.000152199	0.294888	0.293	0.105	1	2
EIF4EBP2	0.000154246	0.292332	0.268	0.092	1	2
TENT2	0.000154746	0.348134	0.171	0.045	1	2
RIOX2	0.000154974	0.271084	0.171	0.045	1	2
TAF5L	0.000155623	0.300676	0.146	0.036	1	2
TBK1	0.000156734	0.326958	0.171	0.046	1	2
VEGFA.1	0.000158426	0.633097	0.537	0.251	1	2
STRN4	0.000159768	0.256409	0.244	0.079	1	2
SEH1L	0.000160009	0.312477	0.195	0.057	1	2
CSTF2T	0.000160241	0.301661	0.146	0.035	1	2
PTOV1.1	0.000162226	0.347981	0.683	0.369	1	2
SEMA5A	0.000162696	0.460536	0.366	0.148	1	2
CAMK2G	0.00016288	0.261891	0.146	0.035	1	2
ANKS1B	0.000164039	0.28344	0.171	0.045	1	2
CARD19	0.000164951	0.33355	0.195	0.056	1	2
ADD1	0.000165974	0.297025	0.366	0.148	1	2
CBWD1	0.000166152	0.323682	0.195	0.058	1	2
TTC3.1	0.000168064	0.535489	0.659	0.36	1	2
P4HB	0.000170388	0.534337	0.512	0.252	1	2
NAT10	0.00017049	0.2833	0.171	0.045	1	2
HOXD10	0.000171484	0.254559	0.171	0.045	1	2
PRKAR2A	0.000176305	0.30934	0.293	0.104	1	2
DEK.1	0.000177694	0.436491	0.488	0.237	1	2
YBX1P1	0.000180156	0.297542	0.268	0.092	1	2
RBM17	0.000181443	0.44319	0.39	0.16	1	2
KIF22	0.000182248	0.259027	0.268	0.091	1	2
TPP2	0.000182363	0.361544	0.244	0.082	1	2
CSNK2A2	0.000183303	0.298609	0.22	0.067	1	2
TRIM28	0.000185307	0.36695	0.39	0.162	1	2
PTN	0.000187463	-0.915714	0.683	0.769	1	2
ARHGAP11A	0.000190009	0.258856	0.122	0.027	1	2
KIAA0895L	0.000193876	0.333031	0.171	0.046	1	2
CHST3	0.000196741	0.385585	0.122	0.027	1	2
SPOUT1	0.000196959	0.318004	0.146	0.036	1	2
MCL1.1	0.000197093	0.516287	0.439	0.196	1	2
TSTD2	0.000198327	0.356198	0.146	0.036	1	2
PPIAP29	0.000200515	0.254637	0.61	0.284	1	2
ANP32B.1	0.000205566	0.461296	0.439	0.204	1	2
DYNC1LI2	0.000206954	0.48815	0.439	0.204	1	2
STX18	0.000207622	0.284008	0.195	0.057	1	2
CRB1	0.00020913	0.453605	0.22	0.07	1	2
GOSR1	0.000209746	0.512259	0.22	0.071	1	2
TNRC6A	0.000211794	0.349414	0.268	0.096	1	2
STX12	0.000212874	0.275017	0.317	0.119	1	2
SRSF1	0.000213001	0.366912	0.415	0.181	1	2
DAZAP1	0.000213741	0.270189	0.293	0.106	1	2
ACD	0.00021543	0.269254	0.195	0.058	1	2
CD276	0.000216986	0.697206	0.22	0.071	1	2
PLXNA1	0.000217919	0.457725	0.171	0.048	1	2
ELP2	0.000217941	0.299053	0.244	0.082	1	2
POLB	0.000220217	0.483384	0.22	0.07	1	2
EAF1	0.000221582	0.376648	0.244	0.083	1	2
AFAP1L2	0.000223172	0.305858	0.146	0.037	1	2
RABL2B	0.000225518	0.2677	0.146	0.037	1	2
EIF4A1P10	0.000225633	0.390567	0.39	0.168	1	2
EIF3A	0.00022855	0.302279	0.317	0.12	1	2
NREP.1	0.000229796	0.332743	0.488	0.228	1	2
DNAJC1	0.00022992	0.267928	0.146	0.037	1	2
ZWINT	0.000232231	0.391075	0.195	0.059	1	2
NTMT1	0.000234165	0.343814	0.22	0.069	1	2
NPDC1	0.000236921	0.367685	0.415	0.181	1	2
INSM1	0.000237113	0.636369	0.195	0.059	1	2
EMD	0.000244082	0.579339	0.39	0.173	1	2
MT2A.1	0.000244282	-1.56736	0.634	0.665	1	2
MYO9B	0.000244732	0.366585	0.22	0.07	1	2
HIST1H2AC	0.000245628	0.271329	0.122	0.027	1	2
CSTF3	0.00024579	0.407971	0.317	0.123	1	2
UBA1	0.000249694	0.348022	0.415	0.185	1	2
HDGFL3	0.00025026	0.309716	0.341	0.135	1	2
SSNA1	0.000252233	0.431425	0.341	0.14	1	2
NKX2-2	0.00025412	0.423907	0.293	0.108	1	2
PWWP3A	0.000256372	0.502415	0.244	0.086	1	2
TTL	0.000258688	0.484696	0.244	0.084	1	2
FARSB	0.000259784	0.401791	0.268	0.097	1	2
STRADB	0.000260536	0.585553	0.244	0.086	1	2
TRAPPC2	0.000263558	0.358014	0.317	0.122	1	2
FPGS	0.000267683	0.367725	0.171	0.048	1	2
PQLC1	0.000268474	0.259835	0.171	0.048	1	2
C5orf15	0.000268524	0.253636	0.268	0.094	1	2
SRRM2	0.000268772	0.294376	0.512	0.246	1	2
TMA16	0.00027477	0.393707	0.195	0.059	1	2
RIMKLB	0.000275166	0.316565	0.244	0.082	1	2
RIC3	0.000278493	0.273148	0.171	0.047	1	2
RAD23B	0.000280892	0.631253	0.341	0.14	1	2
NUP160	0.000281472	0.314267	0.195	0.059	1	2
GIGYF1	0.000284022	0.400788	0.22	0.071	1	2
FXYD6.1	0.000284089	0.527659	0.78	0.532	1	2
MRPL48	0.000292744	0.289024	0.244	0.082	1	2
AMD1	0.000295253	0.293643	0.317	0.122	1	2
CASC15	0.000295882	0.293994	0.171	0.047	1	2
ARHGEF9	0.000297584	0.33752	0.195	0.059	1	2
SFXN1	0.000299077	0.693219	0.293	0.111	1	2
CAMK2N2	0.000300018	0.355042	0.22	0.071	1	2
MYEF2	0.000301982	0.433584	0.341	0.14	1	2
PACSIN2	0.000304231	0.251141	0.195	0.058	1	2
SNHG8	0.000314234	0.42169	0.561	0.28	1	2
UBQLN2	0.000316343	0.271231	0.22	0.071	1	2
UBFD1	0.000321423	0.282772	0.22	0.072	1	2
OTUB1	0.000323412	0.387458	0.39	0.171	1	2
PRCC	0.000325893	0.280734	0.268	0.097	1	2
DGCR2	0.000326726	0.28864	0.244	0.084	1	2
RIC8A	0.000327466	0.287886	0.268	0.096	1	2
CAMLG	0.000328014	0.340273	0.439	0.199	1	2
GPD1	0.000329159	0.282381	0.122	0.028	1	2
HNRNPA3.1	0.000338212	0.547765	0.732	0.462	1	2
PTAR1	0.000338347	0.582947	0.195	0.061	1	2
VCAN	0.00034015	0.584075	0.512	0.246	1	2
KIF23	0.000340637	0.279778	0.122	0.028	1	2
PREB	0.000342064	0.435109	0.268	0.099	1	2
SAP30	0.000343164	0.309002	0.317	0.124	1	2
GFAP.1	0.000343553	-2.47174	0	0.243	1	2
KIFC1	0.000344438	0.457996	0.195	0.061	1	2
MCM7.1	0.000354328	0.33664	0.439	0.202	1	2
GEN1	0.000366377	0.370549	0.171	0.05	1	2
ITGB1	0.000370687	0.394861	0.317	0.129	1	2
NPEPPS	0.000371076	0.264614	0.341	0.139	1	2
WAC	0.000379364	0.420538	0.268	0.098	1	2
RPL7AP11	0.000387804	0.506858	0.317	0.131	1	2
KDM6B	0.00038837	0.449974	0.195	0.062	1	2
MTX2	0.000390329	0.250801	0.293	0.109	1	2
FAM117B	0.000394381	0.478692	0.122	0.029	1	2
MIDN	0.000396119	0.446688	0.439	0.204	1	2
PRXL2A	0.000397943	0.466647	0.341	0.143	1	2
PREPL	0.000411419	0.461425	0.293	0.115	1	2
UBE2J2	0.000414218	0.271269	0.268	0.097	1	2
ZNF451	0.000414463	0.295717	0.22	0.073	1	2
ZEB2.1	0.000415281	0.363124	0.39	0.171	1	2
ERRFI1	0.000415831	0.26559	0.122	0.028	1	2
MAN1B1	0.000427108	0.435298	0.171	0.049	1	2
EIF2B5	0.000429537	0.426672	0.293	0.111	1	2
IGFBP2	0.000434985	0.410975	0.707	0.422	1	2
ACAA2	0.000437541	0.291234	0.244	0.084	1	2
AP2A1	0.000441813	0.452025	0.22	0.074	1	2
GPT2	0.000445855	0.4493	0.341	0.142	1	2
WDR75	0.000449821	0.297723	0.171	0.05	1	2
TPD52L2	0.000450373	0.281818	0.268	0.098	1	2
RNF13	0.000450476	0.317634	0.317	0.126	1	2
NPM1P27	0.00045938	0.378666	0.22	0.073	1	2
TMA7	0.00046404	-0.706352	0.61	0.703	1	2
CLN8	0.000465206	0.298323	0.122	0.029	1	2
TMEM245	0.000466169	0.36597	0.171	0.049	1	2
PISD	0.000466173	0.424678	0.171	0.051	1	2
DIS3	0.000466272	0.278146	0.171	0.05	1	2
HSPE1	0.000467345	0.361498	0.854	0.606	1	2
ATF4	0.000470211	0.384165	0.732	0.424	1	2
PSMG4	0.000471909	0.352171	0.244	0.086	1	2
RAMP1.1	0.00047208	-1.10477	0.049	0.303	1	2
WSB1	0.000474892	0.544697	0.512	0.263	1	2
CRLS1	0.000475187	0.378981	0.317	0.132	1	2
MED15	0.000476723	0.287136	0.22	0.072	1	2
SUPT5H	0.00048262	0.396299	0.317	0.13	1	2
P4HTM	0.000494834	0.288889	0.244	0.086	1	2
SPG11	0.000495683	0.462629	0.244	0.088	1	2
LRRC8B	0.000495943	0.443	0.146	0.039	1	2
DDX49	0.000497335	0.426605	0.244	0.087	1	2
SH3YL1	0.000501265	0.283722	0.171	0.049	1	2
UBP1	0.000504782	0.263037	0.195	0.062	1	2
TEX261	0.000506458	0.314015	0.195	0.061	1	2
CLCN7	0.000509793	0.415528	0.146	0.039	1	2
CHCHD2P9	0.000510472	-1.34935	0.146	0.393	1	2
PIN1	0.000517835	0.310921	0.488	0.238	1	2
TUBB.1	0.00052459	0.452817	0.756	0.522	1	2
FAM19A5	0.000528667	0.570127	0.171	0.051	1	2
ABCF3	0.000531274	0.289155	0.22	0.074	1	2
PRRC2A	0.000533913	0.250735	0.317	0.129	1	2
UCK1	0.000534838	0.318486	0.195	0.062	1	2
NUDT16L1	0.00054658	0.307904	0.317	0.126	1	2
MOB3B	0.000546867	0.368748	0.195	0.062	1	2
MAPK8IP2	0.000548954	0.29635	0.122	0.03	1	2
TPM4	0.000554179	0.40527	0.39	0.18	1	2
RPL13P12	0.000557164	-0.809485	0.585	0.654	1	2
HLA-A.1	0.000557319	-0.727746	0.537	0.644	1	2
SLC44A1.1	0.000559564	0.491975	0.366	0.164	1	2
RPL7AP30	0.000560041	0.3006	0.293	0.115	1	2
EID2	0.000567409	0.51914	0.268	0.102	1	2
IGSF21	0.000570497	0.557673	0.146	0.04	1	2
LETM1	0.000574903	0.44594	0.244	0.09	1	2
RPP25L	0.000578134	0.31945	0.122	0.03	1	2
ENO1	0.000590833	0.251532	0.854	0.549	1	2
CAP1	0.000603622	0.434027	0.341	0.153	1	2
SIGMAR1	0.000605513	0.327888	0.268	0.102	1	2
DVL3	0.000625909	0.316139	0.341	0.145	1	2
PAK2.1	0.000628248	0.397602	0.415	0.189	1	2
WDR33	0.000632535	0.48118	0.244	0.091	1	2
ARPC5	0.000633277	0.38017	0.439	0.212	1	2
TANK	0.000634685	0.294834	0.195	0.062	1	2
BTBD1	0.0006392	0.442798	0.22	0.076	1	2
E2F4	0.000641028	0.478323	0.22	0.078	1	2
U2AF2	0.000648089	0.532819	0.268	0.104	1	2
VDAC2	0.000658417	0.392341	0.488	0.25	1	2
PARK7.1	0.000666061	0.300327	0.585	0.299	1	2
NOM1	0.000669519	0.250422	0.171	0.052	1	2
LMO1	0.000669707	0.442211	0.195	0.064	1	2
GNB1	0.00067315	0.399721	0.707	0.43	1	2
QARS	0.000674845	0.396241	0.268	0.104	1	2
YBX1P6	0.000702177	0.268365	0.122	0.03	1	2
SGTA	0.000702812	0.436192	0.341	0.151	1	2
PPP6R2	0.000705141	0.403557	0.195	0.065	1	2
DUS1L	0.000706669	0.269431	0.171	0.051	1	2
BLOC1S4	0.000709879	0.270763	0.195	0.063	1	2
PABPN1	0.000717533	0.499201	0.39	0.182	1	2
AUP1	0.000721327	0.260945	0.415	0.186	1	2
ODR4	0.000722664	0.356296	0.146	0.04	1	2
ZNRF1	0.000725536	0.342031	0.171	0.051	1	2
DCTN4	0.000727319	0.455592	0.268	0.103	1	2
STAT2	0.000728651	0.599851	0.244	0.093	1	2
MXD1	0.000730486	0.374047	0.195	0.064	1	2
DNAJB6	0.000736673	0.39235	0.537	0.282	1	2
KLC2	0.000744007	0.275481	0.146	0.041	1	2
SRSF2.1	0.00075215	0.458706	0.561	0.314	1	2
ZFAND2B	0.000761336	0.535062	0.244	0.089	1	2
S100A16.1	0.00076616	-1.05796	0	0.22	1	2
UBN1	0.000769927	0.324227	0.171	0.052	1	2
MLC1	0.000772336	-1.11934	0	0.22	1	2
MAP2.1	0.000774953	0.588487	0.683	0.41	1	2
GNE	0.000775425	0.268008	0.122	0.031	1	2
IFITM3.1	0.000789531	-1.30625	0.122	0.359	1	2
MAD2L2.1	0.000809817	0.309434	0.415	0.195	1	2
USP14	0.00081701	0.366707	0.244	0.091	1	2
MIEN1	0.000819999	0.326482	0.512	0.256	1	2
C9orf78	0.000826524	0.290309	0.317	0.132	1	2
SRRT	0.000826847	0.251939	0.293	0.115	1	2
DDX55	0.000836817	0.486015	0.171	0.054	1	2
EIF4H	0.000844577	0.329964	0.659	0.395	1	2
H2AFZP3	0.00084481	0.390186	0.268	0.103	1	2
RCN2	0.000847335	0.430477	0.463	0.227	1	2
FTH1P11	0.000866226	-1.10427	0.244	0.443	1	2
RPL17P36	0.000892406	0.361612	0.659	0.377	1	2
FBXO44	0.000899301	0.386576	0.146	0.042	1	2
ADD3	0.000908989	0.314607	0.22	0.077	1	2
PHC2	0.00091544	0.473716	0.39	0.175	1	2
NES.1	0.000917173	-1.13729	0	0.215	1	2
PTS	0.000917449	0.305268	0.293	0.12	1	2
LIMD2	0.000924273	0.28107	0.122	0.031	1	2
LSM3.1	0.000943019	0.363668	0.61	0.364	1	2
MORF4L1	0.00094492	0.39159	0.659	0.412	1	2
YIPF2	0.000947434	0.415868	0.171	0.054	1	2
RPL31P12.1	0.000956005	-1.03949	0.024	0.249	1	2
COA1	0.000965971	0.294113	0.366	0.164	1	2
SMARCA4	0.000967895	0.298759	0.39	0.174	1	2
TDG	0.000976255	0.440851	0.22	0.081	1	2
NOP56	0.000983594	0.25212	0.561	0.281	1	2
METTL21A	0.0009865	0.268084	0.146	0.042	1	2
CEP97	0.000999436	0.296675	0.146	0.042	1	2
CDK2	0.00100276	0.396703	0.146	0.043	1	2
FAHD2CP	0.00101759	0.355032	0.146	0.042	1	2
DCTN3.1	0.00102103	0.442043	0.463	0.232	1	2
SF3B1	0.0010294	0.341597	0.463	0.221	1	2
SPC24	0.00102983	0.276648	0.146	0.042	1	2
EIPR1	0.00103493	0.286548	0.22	0.077	1	2
BMP2	0.00104388	0.3129	0.122	0.032	1	2
ACO1	0.00105819	0.498511	0.146	0.042	1	2
THRA	0.00105986	0.302972	0.341	0.148	1	2
ZSWIM7	0.00106264	0.283241	0.293	0.119	1	2
C4orf48.1	0.0010791	0.250709	0.61	0.316	1	2
CNOT9	0.00108996	0.321817	0.268	0.103	1	2
EMC3-AS1	0.00109772	0.413735	0.171	0.055	1	2
PSMA1	0.00110627	0.406756	0.61	0.336	1	2
NCK2	0.00111027	0.411516	0.195	0.068	1	2
ATP6V1A	0.00111035	0.418812	0.268	0.107	1	2
PARP1	0.00111211	0.499935	0.463	0.243	1	2
ELOF1	0.00111389	0.283005	0.293	0.12	1	2
LDHB.1	0.00112583	0.312525	0.854	0.661	1	2
CHAF1A	0.00112952	0.25054	0.146	0.042	1	2
NHLRC2	0.00113794	0.616374	0.122	0.032	1	2
ASCC2	0.00115419	0.486456	0.195	0.067	1	2
HLA-B.1	0.00115591	-1.19814	0.561	0.622	1	2
MRPL20-AS1	0.00115756	0.398872	0.146	0.043	1	2
NEK7	0.0011621	0.295481	0.122	0.032	1	2
GAR1	0.00116768	0.568407	0.244	0.097	1	2
TRA2B.1	0.00118846	0.293963	0.634	0.356	1	2
KIAA0232	0.00118908	0.494751	0.317	0.138	1	2
FUS.1	0.00119166	0.332119	0.732	0.484	1	2
PHTF2	0.0012057	0.357545	0.22	0.079	1	2
ASRGL1	0.00122115	0.266549	0.293	0.119	1	2
MTREX	0.00122748	0.346113	0.171	0.055	1	2
SUDS3	0.0012387	0.338038	0.195	0.067	1	2
NOL9	0.0012389	0.34161	0.146	0.043	1	2
BRD2	0.00124605	0.719099	0.39	0.196	1	2
RANBP2	0.00126485	0.287295	0.195	0.067	1	2
LAPTM4B	0.00127163	0.335064	0.512	0.263	1	2
MTMR2	0.00127419	0.368196	0.146	0.043	1	2
BOC	0.00127777	0.367195	0.146	0.043	1	2
TRPT1	0.00131307	0.387848	0.268	0.111	1	2
DHX9	0.00132797	0.360746	0.415	0.197	1	2
CASC3	0.00133372	0.321694	0.244	0.094	1	2
KDM4A	0.00133743	0.282222	0.171	0.054	1	2
LARP1B	0.00134333	0.259412	0.195	0.068	1	2
C3orf70	0.00134437	0.280753	0.268	0.106	1	2
RBM33	0.00136341	0.26117	0.195	0.067	1	2
TCEAL5	0.00136368	0.47903	0.244	0.093	1	2
TTC19	0.00137775	0.266408	0.317	0.137	1	2
ECH1	0.00138783	0.338694	0.366	0.169	1	2
BUB3.1	0.00139469	0.297684	0.293	0.124	1	2
RMDN1	0.00140401	0.418168	0.171	0.055	1	2
CORO7	0.00141036	0.312559	0.146	0.043	1	2
ARPP19	0.00141154	0.272025	0.439	0.208	1	2
UHRF2	0.00141179	0.274417	0.244	0.093	1	2
CTTNBP2	0.00143107	0.290702	0.22	0.08	1	2
CLOCK	0.00144974	0.318697	0.122	0.033	1	2
UPF3A	0.00146463	0.295169	0.439	0.22	1	2
BACE1	0.00147234	0.298651	0.439	0.21	1	2
TOMM5	0.00147553	0.269703	0.195	0.069	1	2
NAB2	0.00149184	0.446298	0.146	0.044	1	2
TOM1L2	0.00150218	0.306283	0.146	0.044	1	2
HERPUD2	0.00150321	0.263272	0.244	0.094	1	2
CHD1L	0.00150335	0.368021	0.171	0.056	1	2
GTF3C4	0.00151086	0.266934	0.122	0.032	1	2
COPS3	0.00155062	0.29317	0.293	0.122	1	2
VOPP1	0.00155222	-1.01753	0.22	0.43	1	2
TMEFF2	0.00155547	0.266797	0.195	0.066	1	2
SYT11	0.00157144	0.252971	0.634	0.363	1	2
NCOA4	0.00157524	0.396933	0.171	0.056	1	2
ATAD1	0.00157573	0.262937	0.146	0.043	1	2
RWDD4	0.00158108	0.45942	0.195	0.07	1	2
PRDX2.1	0.00160655	0.404337	0.732	0.494	1	2
VEGFB	0.00160707	0.338438	0.341	0.154	1	2
ZNF43	0.0016149	0.250431	0.171	0.055	1	2
HAUS6	0.00162986	0.358384	0.146	0.044	1	2
LIMA1	0.00166348	0.363054	0.415	0.205	1	2
SYNGR1	0.00167142	0.285321	0.146	0.044	1	2
KAT6A	0.00170353	0.364067	0.195	0.07	1	2
STX10	0.00171472	0.448679	0.268	0.115	1	2
RPL7L1	0.00172965	0.303863	0.341	0.153	1	2
MCM3	0.00174329	0.322347	0.195	0.069	1	2
HSBP1	0.00174418	0.317399	0.78	0.468	1	2
AHCTF1	0.00175315	0.447349	0.171	0.058	1	2
RAB2A	0.00176459	0.400893	0.488	0.262	1	2
AKT3	0.001771	0.352884	0.22	0.082	1	2
GHITM	0.00177212	0.48297	0.341	0.157	1	2
YTHDC2	0.00177956	0.56148	0.146	0.046	1	2
CSNK1G2	0.00178242	0.251367	0.195	0.069	1	2
PPP6R3	0.00178867	0.333359	0.244	0.098	1	2
NSD2	0.00180739	0.352994	0.244	0.098	1	2
DYRK4	0.00181056	0.273087	0.195	0.069	1	2
FDPS	0.00182343	0.282539	0.366	0.169	1	2
NUP205	0.00182736	0.403031	0.22	0.083	1	2
CPLANE1	0.00185975	0.42581	0.122	0.034	1	2
PRPF4B	0.0018755	0.275299	0.293	0.123	1	2
RBP1.1	0.00188826	-0.864387	0.171	0.395	1	2
PTMAP2	0.00189913	0.352608	0.366	0.163	1	2
ALDH5A1	0.00190648	0.303257	0.146	0.045	1	2
HSP90AA1	0.0019257	-0.651512	0.561	0.724	1	2
EIF4G2	0.00193184	0.417054	0.707	0.443	1	2
MAML1	0.00195084	0.556306	0.146	0.044	1	2
ATP6V0D1	0.00196459	0.662036	0.268	0.115	1	2
VAT1	0.00196585	0.329579	0.293	0.125	1	2
ZNF544	0.00197109	0.337045	0.171	0.057	1	2
ARPC1B	0.00200581	0.386769	0.22	0.083	1	2
VPS13C	0.00200733	0.496632	0.22	0.081	1	2
MCCC2	0.00202005	0.37368	0.171	0.057	1	2
CNOT1	0.00204887	0.305459	0.268	0.112	1	2
TRIM33	0.00207722	0.255647	0.195	0.069	1	2
PSMD8	0.00215912	0.421039	0.561	0.323	1	2
DEAF1	0.00216848	0.28863	0.244	0.094	1	2
SF3A1	0.00217015	0.292615	0.317	0.143	1	2
TRIM8	0.00220285	0.333017	0.195	0.069	1	2
LZTR1	0.00220755	0.378508	0.146	0.045	1	2
GPBP1L1	0.00221426	0.279328	0.171	0.058	1	2
AQP4.1	0.00221855	-1.26878	0.024	0.223	1	2
RPAIN.1	0.00225008	0.380345	0.61	0.373	1	2
TBC1D5	0.00225951	0.32801	0.39	0.192	1	2
PIGS	0.00226312	0.439659	0.171	0.058	1	2
MTSS1L	0.00226593	0.647161	0.293	0.129	1	2
FAM206A	0.00227023	0.294876	0.122	0.035	1	2
SUMO2P17	0.00227532	0.330044	0.39	0.186	1	2
GINS2	0.00228719	0.356254	0.171	0.058	1	2
EIF5A	0.00230432	0.308	0.537	0.3	1	2
APCDD1	0.0023182	0.257234	0.22	0.085	1	2
TFDP2	0.00233975	0.476594	0.22	0.088	1	2
RAF1	0.00234988	0.26703	0.317	0.142	1	2
GPM6A.1	0.00235324	0.436653	0.78	0.564	1	2
UBBP4	0.00242028	0.394934	0.537	0.332	1	2
ARHGAP31	0.00243923	0.26003	0.122	0.035	1	2
ACAT1	0.00244413	0.251453	0.293	0.127	1	2
PMPCA	0.00248587	0.393229	0.171	0.058	1	2
TCEAL3	0.00248741	0.45652	0.415	0.204	1	2
POLDIP3	0.00249399	0.304442	0.22	0.085	1	2
DNAJB12	0.00249463	0.371992	0.122	0.035	1	2
NIPSNAP2	0.00251076	-1.25441	0.366	0.508	1	2
NASP.1	0.00252196	0.428579	0.537	0.297	1	2
CCT6A	0.00252368	-1.14564	0.707	0.691	1	2
DPYSL2	0.00254326	0.305945	0.61	0.375	1	2
GTSE1	0.00264993	0.279044	0.146	0.046	1	2
ZNF300	0.00266772	0.306948	0.146	0.046	1	2
MARCH6	0.0027172	0.279934	0.415	0.205	1	2
RPL7P15	0.00274264	0.280678	0.171	0.059	1	2
ZMYND11	0.00274433	0.364777	0.171	0.06	1	2
PCF11	0.00275726	0.271164	0.195	0.071	1	2
HOPX.1	0.00277518	-1.30472	0.073	0.265	1	2
TTTY14	0.00279315	0.341526	0.171	0.059	1	2
DYNLT1	0.00281468	0.382528	0.634	0.375	1	2
CRISPLD1	0.0029325	0.360274	0.146	0.046	1	2
HCG18	0.00293259	0.284155	0.171	0.059	1	2
ACAT2	0.00293292	0.422454	0.366	0.181	1	2
STRAP	0.00294935	0.322421	0.439	0.223	1	2
ZNF292	0.00301329	0.308301	0.244	0.1	1	2
JPT2	0.00302568	0.313327	0.146	0.048	1	2
AFMID	0.00303483	0.35348	0.146	0.048	1	2
METTL6	0.00310596	0.302098	0.146	0.047	1	2
KHSRP	0.00311631	0.32358	0.293	0.131	1	2
DPP7	0.00312024	0.406673	0.317	0.145	1	2
SLC25A36	0.00312759	0.378636	0.244	0.102	1	2
HLA-E.1	0.00317176	-0.962565	0	0.177	1	2
MFSD12	0.00317682	0.308185	0.146	0.048	1	2
CTSD.1	0.00319209	0.357908	0.439	0.232	1	2
ZCCHC14	0.00320943	0.272896	0.171	0.06	1	2
MRPL13	0.00322853	0.256216	0.341	0.162	1	2
MRPL47	0.0032318	0.346796	0.39	0.202	1	2
C12orf57.1	0.00328233	-0.689691	0.268	0.482	1	2
NOLC1	0.00333746	0.282201	0.22	0.088	1	2
RETREG2	0.00340062	0.265304	0.268	0.113	1	2
CS	0.00340678	0.724087	0.293	0.133	1	2
PHKG1	0.00341191	-1.0156	0.122	0.324	1	2
PCSK1N.1	0.0034223	0.251235	0.512	0.257	1	2
NDRG1.1	0.00343517	0.491544	0.22	0.086	1	2
MTATP6P1	0.00351769	0.313112	0.317	0.143	1	2
HNRNPDL.1	0.00353316	0.301937	0.707	0.421	1	2
MRPS17	0.00355529	-0.49982	0.146	0.357	1	2
EIF2AK1	0.00361345	0.313346	0.341	0.166	1	2
PDZD4	0.00366303	0.307255	0.22	0.087	1	2
MT1X.1	0.00367815	-0.638758	0.293	0.472	1	2
TARS	0.00372582	0.431854	0.244	0.104	1	2
MRPL22	0.00372954	0.281312	0.293	0.135	1	2
SIN3A	0.00375189	0.365609	0.122	0.037	1	2
TOLLIP	0.00379701	0.528885	0.22	0.091	1	2
PSMB6.1	0.00387118	0.445692	0.732	0.48	1	2
CRABP1	0.00390444	0.388524	0.122	0.036	1	2
TMEM59	0.00393627	0.322682	0.537	0.302	1	2
SRSF11	0.00394859	0.360302	0.512	0.286	1	2
HNRNPD.1	0.00413484	0.300348	0.683	0.475	1	2
LINC01578	0.00415736	0.325955	0.488	0.272	1	2
IVNS1ABP	0.00416558	0.316906	0.293	0.135	1	2
CD63	0.0041905	-0.67889	0.634	0.703	1	2
MTF2	0.0042	0.301369	0.195	0.075	1	2
RBBP6	0.00420282	0.353988	0.293	0.132	1	2
NEAT1.1	0.00429844	0.428108	0.366	0.177	1	2
TAF1	0.00432172	0.327899	0.171	0.062	1	2
FAM57B	0.00432553	0.374344	0.122	0.037	1	2
SPPL3	0.00433248	0.277682	0.244	0.104	1	2
GOT1	0.00440548	0.361712	0.171	0.062	1	2
ATP1B2.1	0.00441065	-0.950136	0.195	0.373	1	2
CHCHD2P8	0.00451854	-0.87084	0.098	0.305	1	2
ENOPH1	0.00453595	0.302389	0.341	0.168	1	2
FAU	0.00455877	-0.329289	0.78	0.802	1	2
DDX21	0.00456661	0.497142	0.195	0.078	1	2
ACBD5	0.00457993	0.334629	0.22	0.091	1	2
ZNF428.1	0.00461262	0.320216	0.659	0.428	1	2
EHBP1	0.00467266	0.509184	0.22	0.091	1	2
ST3GAL3	0.00472104	0.312057	0.146	0.05	1	2
DPYSL3.1	0.00477184	0.287347	0.537	0.316	1	2
SLC44A2	0.00479764	0.274154	0.268	0.119	1	2
SRSF9	0.00482318	0.342044	0.61	0.371	1	2
PTDSS2	0.00485445	0.282096	0.146	0.049	1	2
RCBTB2	0.004868	0.257504	0.122	0.037	1	2
HNRNPUL1.1	0.00490168	0.259503	0.415	0.217	1	2
SEMA6D	0.00498756	0.443343	0.171	0.066	1	2
BRD7	0.0050416	0.300421	0.293	0.137	1	2
ASXL1	0.00506429	0.290318	0.195	0.077	1	2
NUF2	0.00507155	0.288651	0.195	0.075	1	2
UNG	0.0051005	0.37435	0.195	0.075	1	2
CCDC93	0.00513054	0.36514	0.22	0.092	1	2
SELENOS	0.00513853	0.508832	0.293	0.141	1	2
SRP14	0.00517848	0.274427	0.78	0.563	1	2
RANGAP1	0.00518854	0.323805	0.146	0.05	1	2
AZGP1	0.00523568	-0.845153	0	0.161	1	2
MBD1	0.00530841	0.291511	0.171	0.062	1	2
MFF	0.00532747	0.280352	0.537	0.323	1	2
EDF1.1	0.00532975	0.330718	0.78	0.536	1	2
TTC9B	0.00533058	0.50608	0.195	0.075	1	2
C2orf76	0.00536276	0.411389	0.171	0.064	1	2
NOP16	0.00540149	0.351255	0.244	0.106	1	2
TXN.1	0.00540693	0.318842	0.659	0.433	1	2
ARMCX3	0.00543612	0.260992	0.317	0.151	1	2
GRIPAP1	0.00544365	0.364435	0.146	0.051	1	2
TCERG1	0.00552308	0.258965	0.268	0.12	1	2
APOE.1	0.00562692	-2.24746	0.195	0.356	1	2
HSP90AB1	0.00565702	0.26864	0.805	0.643	1	2
CELF1	0.00568609	0.365897	0.293	0.142	1	2
SSRP1	0.00569114	0.281097	0.39	0.204	1	2
CDKN2A	0.0057589	-0.902737	0	0.158	1	2
NAP1L4	0.00581154	0.293335	0.39	0.207	1	2
BRK1	0.00581605	0.27981	0.634	0.413	1	2
UBE2D3	0.00584733	0.314447	0.488	0.265	1	2
TRAK2	0.00585555	0.317889	0.146	0.051	1	2
ORC2	0.00587072	0.258929	0.122	0.038	1	2
RPL13	0.00587104	-0.276485	0.951	0.888	1	2
FOXM1	0.00589931	0.343379	0.22	0.092	1	2
GDI1	0.00590849	0.300984	0.585	0.347	1	2
IP6K2.1	0.0059114	0.25302	0.488	0.281	1	2
YIPF1	0.00591604	0.264966	0.122	0.039	1	2
ATP6V0E2	0.00591781	0.373702	0.561	0.35	1	2
SCG5	0.00594397	0.325937	0.463	0.248	1	2
PSPH	0.00596128	-0.664582	0.171	0.369	1	2
TRAPPC1	0.00596602	0.374417	0.366	0.186	1	2
RCOR2	0.00600659	0.290138	0.171	0.064	1	2
CHI3L1.1	0.00601217	-2.30422	0.024	0.19	1	2
VPS45	0.00601734	0.250443	0.195	0.076	1	2
PPP1R35	0.00609697	0.354656	0.244	0.108	1	2
MEIS2	0.00613874	0.332269	0.146	0.052	1	2
NME4	0.00626706	0.29218	0.439	0.25	1	2
MSRB2	0.00628757	0.395812	0.171	0.063	1	2
NOC2L	0.00631614	0.368385	0.22	0.095	1	2
SPG7	0.0063292	0.400185	0.293	0.144	1	2
CASTOR3	0.00633403	0.348214	0.146	0.051	1	2
MIF	0.0064434	0.417471	0.756	0.556	1	2
ATP6V0E1	0.00644397	0.456054	0.439	0.254	1	2
TMCC1	0.00646008	0.289914	0.146	0.051	1	2
SGCB	0.00649401	0.306763	0.317	0.155	1	2
HSPE1P4	0.00654705	0.256504	0.585	0.361	1	2
TCAF1	0.00661331	0.509475	0.293	0.147	1	2
ZNF260	0.00664686	0.320762	0.146	0.052	1	2
TFPI	0.00668687	-0.727957	0	0.153	1	2
FOXK2	0.0067147	0.302179	0.195	0.078	1	2
DCAF8	0.00675879	0.351671	0.22	0.094	1	2
ORC6	0.00677214	0.333778	0.146	0.052	1	2
N4BP2L2	0.00679779	0.269937	0.268	0.124	1	2
HES6.1	0.00691538	0.580387	0.39	0.211	1	2
ZRANB2	0.0069394	0.394287	0.293	0.147	1	2
PDHA1	0.00703788	0.314856	0.366	0.194	1	2
ZNF117	0.00704438	0.393428	0.171	0.066	1	2
CWC22	0.00708041	0.324079	0.146	0.052	1	2
ARHGAP33	0.00708318	0.420685	0.171	0.067	1	2
ATN1	0.00709589	0.303528	0.317	0.162	1	2
CDK2AP2	0.00715484	0.253424	0.293	0.138	1	2
D2HGDH	0.00716588	0.305695	0.122	0.04	1	2
MCTS1	0.0071718	0.287212	0.244	0.109	1	2
DUT	0.00717213	0.338552	0.439	0.251	1	2
SMC6	0.00723085	0.254749	0.146	0.052	1	2
NPM1	0.00734747	0.316943	0.732	0.514	1	2
AURKB	0.00737344	0.45083	0.171	0.066	1	2
SPIN1	0.00742521	0.288461	0.244	0.109	1	2
MTSS1	0.00749056	0.277289	0.22	0.094	1	2
GIHCG.1	0.00749665	-1.96402	0.146	0.307	1	2
HTT	0.00750357	0.278764	0.146	0.052	1	2
ROCK1	0.00752169	0.278692	0.22	0.094	1	2
NFIL3	0.00758134	0.287395	0.122	0.04	1	2
SEC61G	0.00760529	-1.0147	0.732	0.743	1	2
CSTF1	0.00764059	0.321362	0.122	0.04	1	2
CSDE1	0.00771452	0.341181	0.512	0.304	1	2
C21orf58	0.00783444	0.31184	0.122	0.04	1	2
KLRC1	0.00793512	0.324683	0.171	0.066	1	2
PHF21A	0.00794785	0.415204	0.146	0.053	1	2
TMED10	0.0081877	-0.892218	0.195	0.354	1	2
ITFG1	0.00822774	0.328208	0.244	0.109	1	2
CPSF3	0.00828336	0.427416	0.146	0.053	1	2
MRPL58	0.00830662	0.507915	0.171	0.066	1	2
CCDC80	0.00839689	-0.719166	0	0.146	1	2
GPATCH11	0.00844978	0.348342	0.146	0.053	1	2
FAM131B	0.00845108	0.344087	0.268	0.123	1	2
TMEM41A	0.00850241	0.329746	0.171	0.067	1	2
GADD45G.1	0.00870605	0.389944	0.293	0.143	1	2
HAP1.1	0.00879275	-0.843654	0.024	0.188	1	2
RTN4	0.00881423	0.501056	0.585	0.401	1	2
BRSK1	0.00885345	0.331103	0.146	0.054	1	2
FANCD2	0.00894158	0.412187	0.146	0.054	1	2
ZNF462	0.00900312	0.342834	0.317	0.161	1	2
MT2P1.1	0.00905951	-0.854085	0.122	0.298	1	2
HAT1	0.00908112	0.359843	0.22	0.096	1	2
GTF3C6	0.00909282	0.366626	0.439	0.249	1	2
LINC01315	0.00911945	0.519708	0.122	0.041	1	2
GNB4.1	0.00912781	0.253099	0.268	0.127	1	2
DNAJB11	0.00918519	0.415636	0.585	0.403	1	2
MRGBP	0.00923748	0.302976	0.122	0.041	1	2
SOAT1	0.00925645	0.35514	0.122	0.041	1	2
SF3B2	0.00935127	0.295177	0.439	0.254	1	2
TRIM2	0.00935315	0.385606	0.341	0.18	1	2
UBL3	0.00955664	0.297241	0.244	0.113	1	2
NIF3L1	0.00975277	0.319748	0.146	0.055	1	2
RPL37AP8	0.00981618	-0.693909	0.024	0.175	1	2
BST2	0.00986702	-0.730515	0	0.141	1	2
UBE2S.1	0.00991326	0.264642	0.488	0.303	1	2
TRAPPC2B	0.00994707	0.327159	0.171	0.068	1	2
SYNM.1	0	1.59608	1	0.026	0	3 SYNM/NES/VIM
NES.2	3.27968e-129	1.09424	1	0.197	1.22224e-124	3 SYNM/NES/VIM
NOS2	1.05592e-55	0.908691	0.526	0.118	3.93509e-51	3 SYNM/NES/VIM
SLC4A4	3.81727e-42	0.633174	0.554	0.152	1.42258e-37	3 SYNM/NES/VIM
DCN	7.56945e-41	0.788538	0.68	0.228	2.82091e-36	3 SYNM/NES/VIM
CDH6	9.70427e-40	0.600169	0.354	0.075	3.61649e-35	3 SYNM/NES/VIM
CCT6P2	2.1713e-39	0.801163	0.68	0.24	8.09177e-35	3 SYNM/NES/VIM
CCT6A.1	9.00203e-39	0.915993	0.96	0.686	3.35479e-34	3 SYNM/NES/VIM
EGFR.1	6.15768e-37	0.776004	0.909	0.458	2.29478e-32	3 SYNM/NES/VIM
MTCO1P40	3.70687e-36	0.465255	0.326	0.068	1.38144e-31	3 SYNM/NES/VIM
PREX1	4.27877e-36	0.553216	0.491	0.136	1.59457e-31	3 SYNM/NES/VIM
GNG7	7.01854e-36	0.525018	0.531	0.154	2.6156e-31	3 SYNM/NES/VIM
VOPP1.1	9.71825e-36	0.726433	0.886	0.419	3.6217e-31	3 SYNM/NES/VIM
AZGP1.1	3.71304e-35	0.484006	0.531	0.153	1.38374e-30	3 SYNM/NES/VIM
SUMF2.1	7.92298e-35	0.764963	0.897	0.465	2.95266e-30	3 SYNM/NES/VIM
CCT6P4	1.309e-34	0.462317	0.337	0.074	4.87824e-30	3 SYNM/NES/VIM
JAG1	1.22344e-33	0.509868	0.394	0.1	4.55938e-29	3 SYNM/NES/VIM
RPH3A	2.23539e-33	0.457567	0.389	0.096	8.33062e-29	3 SYNM/NES/VIM
PSPH.1	7.38098e-33	0.751048	0.794	0.359	2.75067e-28	3 SYNM/NES/VIM
MT-CO1	8.01854e-33	0.847727	0.709	0.295	2.98827e-28	3 SYNM/NES/VIM
PDGFA	7.13519e-32	0.566403	0.44	0.125	2.65907e-27	3 SYNM/NES/VIM
FAM84A	7.23189e-32	0.388971	0.354	0.085	2.69511e-27	3 SYNM/NES/VIM
MRPS17.1	1.6919e-31	0.64131	0.789	0.347	6.30521e-27	3 SYNM/NES/VIM
CDH4	1.85437e-31	0.412693	0.206	0.034	6.91068e-27	3 SYNM/NES/VIM
ZYX	3.86349e-31	0.622753	0.743	0.309	1.43981e-26	3 SYNM/NES/VIM
MT-CO2	1.05695e-30	0.813621	0.766	0.347	3.93893e-26	3 SYNM/NES/VIM
POSTN.1	1.84812e-30	0.538458	0.423	0.117	6.88739e-26	3 SYNM/NES/VIM
CDC42EP4	3.13133e-30	0.536374	0.469	0.142	1.16695e-25	3 SYNM/NES/VIM
CHCHD2P2	9.95202e-30	0.512959	0.606	0.209	3.70882e-25	3 SYNM/NES/VIM
MLC1.1	4.38591e-29	0.553878	0.594	0.211	1.6345e-24	3 SYNM/NES/VIM
CHCHD2P5	4.58488e-29	0.405661	0.446	0.128	1.70865e-24	3 SYNM/NES/VIM
SRPX.1	5.79274e-29	0.473853	0.406	0.114	2.15878e-24	3 SYNM/NES/VIM
ADGRB1	7.73027e-29	0.37333	0.383	0.103	2.88084e-24	3 SYNM/NES/VIM
SEC14L1	8.0613e-29	0.673586	0.434	0.132	3.00421e-24	3 SYNM/NES/VIM
NIPSNAP2.1	8.45161e-29	0.677146	0.891	0.499	3.14966e-24	3 SYNM/NES/VIM
DENND2A	8.58507e-29	0.41494	0.303	0.071	3.1994e-24	3 SYNM/NES/VIM
CAMK2B	1.02708e-28	0.541323	0.377	0.104	3.82761e-24	3 SYNM/NES/VIM
CCDC80.1	2.60149e-28	0.506909	0.451	0.139	9.69496e-24	3 SYNM/NES/VIM
CHCHD2P8.1	2.94019e-28	0.517564	0.754	0.295	1.09572e-23	3 SYNM/NES/VIM
TAP1	4.35375e-28	0.391969	0.4	0.113	1.62251e-23	3 SYNM/NES/VIM
RHOC.1	4.47428e-28	0.483474	0.583	0.204	1.66743e-23	3 SYNM/NES/VIM
CPNE2	7.54434e-28	0.406948	0.497	0.159	2.81155e-23	3 SYNM/NES/VIM
TFPI.1	3.56353e-27	0.418885	0.463	0.146	1.32802e-22	3 SYNM/NES/VIM
ELOVL2	6.60971e-27	0.400012	0.446	0.136	2.46324e-22	3 SYNM/NES/VIM
MT-ND3	8.76497e-27	0.67238	0.606	0.235	3.26644e-22	3 SYNM/NES/VIM
CHCHD2P3	1.05549e-26	0.422665	0.44	0.134	3.93351e-22	3 SYNM/NES/VIM
MT-ND4	2.57051e-26	0.817973	0.731	0.358	9.57953e-22	3 SYNM/NES/VIM
MEOX2	2.68575e-26	0.426569	0.229	0.048	1.0009e-21	3 SYNM/NES/VIM
DAG1	2.75397e-26	0.492649	0.491	0.168	1.02632e-21	3 SYNM/NES/VIM
MT-ND1	4.451e-26	0.717894	0.543	0.206	1.65875e-21	3 SYNM/NES/VIM
MT2P1.2	4.80918e-26	0.547122	0.697	0.289	1.79224e-21	3 SYNM/NES/VIM
CDK6	5.04453e-26	0.592327	0.434	0.14	1.87995e-21	3 SYNM/NES/VIM
MMP14.1	8.13411e-26	0.405742	0.337	0.091	3.03134e-21	3 SYNM/NES/VIM
DBIP1	1.36548e-25	0.642618	0.669	0.287	5.08874e-21	3 SYNM/NES/VIM
MT-ND4L	3.92588e-25	0.519104	0.309	0.081	1.46306e-20	3 SYNM/NES/VIM
MT-ND5	4.08079e-25	0.695302	0.469	0.162	1.52079e-20	3 SYNM/NES/VIM
HOPX.2	4.22573e-25	0.580511	0.64	0.256	1.5748e-20	3 SYNM/NES/VIM
FKBP5	4.75187e-25	0.472518	0.417	0.132	1.77088e-20	3 SYNM/NES/VIM
CCDC102B	6.37719e-25	0.437852	0.269	0.064	2.37659e-20	3 SYNM/NES/VIM
METTL7B.1	6.61778e-25	0.358544	0.383	0.112	2.46625e-20	3 SYNM/NES/VIM
CHCHD2P9.1	6.65567e-25	0.569584	0.811	0.383	2.48037e-20	3 SYNM/NES/VIM
BCAT1	8.17776e-25	0.401495	0.526	0.187	3.04761e-20	3 SYNM/NES/VIM
COLGALT2	8.94094e-25	0.381109	0.314	0.083	3.33202e-20	3 SYNM/NES/VIM
SCN11A.1	1.22735e-24	0.593786	0.829	0.459	4.57396e-20	3 SYNM/NES/VIM
METTL7A	2.23052e-24	0.464406	0.531	0.197	8.3125e-20	3 SYNM/NES/VIM
TIMP1.1	2.60198e-24	0.445052	0.783	0.362	9.6968e-20	3 SYNM/NES/VIM
MT-CO3	2.75547e-24	0.701735	0.771	0.389	1.02688e-19	3 SYNM/NES/VIM
S100A16.2	3.11845e-24	0.478931	0.56	0.212	1.16215e-19	3 SYNM/NES/VIM
NELL1	3.27202e-24	0.508552	0.349	0.101	1.21938e-19	3 SYNM/NES/VIM
KRBOX1	3.39818e-24	0.256853	0.194	0.037	1.2664e-19	3 SYNM/NES/VIM
LANCL2	4.01814e-24	0.631546	0.634	0.266	1.49744e-19	3 SYNM/NES/VIM
RAC1P2	6.19943e-24	0.322091	0.509	0.175	2.31034e-19	3 SYNM/NES/VIM
PHKG1.1	6.71904e-24	0.49656	0.737	0.315	2.50398e-19	3 SYNM/NES/VIM
HLA-A.2	7.67971e-24	0.622979	0.937	0.637	2.862e-19	3 SYNM/NES/VIM
PMP22	7.77071e-24	0.47641	0.44	0.147	2.89591e-19	3 SYNM/NES/VIM
RPL23AP75	1.9465e-23	0.269488	0.331	0.091	7.25403e-19	3 SYNM/NES/VIM
CHCHD2P6	2.2393e-23	0.598475	0.846	0.481	8.34519e-19	3 SYNM/NES/VIM
CHCHD10	2.26661e-23	0.440811	0.651	0.268	8.44696e-19	3 SYNM/NES/VIM
RAB13.1	2.76067e-23	0.383027	0.474	0.165	1.02882e-18	3 SYNM/NES/VIM
ATP1B2.2	3.08923e-23	0.531859	0.771	0.364	1.15126e-18	3 SYNM/NES/VIM
CHCHD2P11	4.15364e-23	0.301133	0.274	0.069	1.54794e-18	3 SYNM/NES/VIM
EEF1A1P13	4.23818e-23	0.305408	0.423	0.135	1.57944e-18	3 SYNM/NES/VIM
HLA-J.1	4.65794e-23	0.427685	0.463	0.16	1.73587e-18	3 SYNM/NES/VIM
PPIAP2	5.21567e-23	0.332779	0.36	0.106	1.94372e-18	3 SYNM/NES/VIM
RRBP1	7.90224e-23	0.311011	0.36	0.108	2.94493e-18	3 SYNM/NES/VIM
LGALS3BP.1	8.2001e-23	0.398562	0.491	0.176	3.05593e-18	3 SYNM/NES/VIM
GPR37L1	1.16539e-22	0.38322	0.411	0.136	4.34305e-18	3 SYNM/NES/VIM
MT-ND2	1.32962e-22	0.618336	0.583	0.245	4.95508e-18	3 SYNM/NES/VIM
EEF1A1P19	2.52335e-22	0.37	0.509	0.185	9.40376e-18	3 SYNM/NES/VIM
PYGB	2.66557e-22	0.293663	0.383	0.12	9.93378e-18	3 SYNM/NES/VIM
ANKRD9	4.55836e-22	0.284778	0.149	0.026	1.69876e-17	3 SYNM/NES/VIM
ACSL3	5.02455e-22	0.404769	0.48	0.176	1.8725e-17	3 SYNM/NES/VIM
HLA-B.2	6.17319e-22	0.648648	0.92	0.616	2.30056e-17	3 SYNM/NES/VIM
SPARC.1	6.63211e-22	0.53053	0.869	0.485	2.47159e-17	3 SYNM/NES/VIM
MT2A.2	8.5568e-22	0.498699	0.971	0.658	3.18886e-17	3 SYNM/NES/VIM
SEC61G.1	1.73956e-21	0.441155	0.977	0.738	6.4828e-17	3 SYNM/NES/VIM
ANXA5.1	2.54108e-21	0.452672	0.777	0.374	9.46985e-17	3 SYNM/NES/VIM
MT-ATP6	2.77901e-21	0.589525	0.594	0.261	1.03565e-16	3 SYNM/NES/VIM
PPIAP3	2.81088e-21	0.362597	0.446	0.156	1.04753e-16	3 SYNM/NES/VIM
MT-RNR2	5.01186e-21	0.45816	0.851	0.456	1.86777e-16	3 SYNM/NES/VIM
RPL23AP32	6.32525e-21	0.267331	0.251	0.064	2.35723e-16	3 SYNM/NES/VIM
NCMAP	7.03205e-21	0.358688	0.149	0.027	2.62063e-16	3 SYNM/NES/VIM
RHOU	7.58772e-21	0.347067	0.314	0.093	2.82771e-16	3 SYNM/NES/VIM
CTSA.1	1.04612e-20	0.283645	0.366	0.116	3.89859e-16	3 SYNM/NES/VIM
ETV5	1.04834e-20	0.367857	0.36	0.116	3.90686e-16	3 SYNM/NES/VIM
ZNF713	1.12726e-20	0.393189	0.297	0.086	4.20098e-16	3 SYNM/NES/VIM
LFNG	1.13762e-20	0.398589	0.411	0.141	4.23957e-16	3 SYNM/NES/VIM
PPP1R14BP2	1.32275e-20	0.271408	0.286	0.079	4.92948e-16	3 SYNM/NES/VIM
HLA-C.2	1.4836e-20	0.603657	0.869	0.531	5.52891e-16	3 SYNM/NES/VIM
CD151.1	1.72441e-20	0.396497	0.531	0.216	6.42635e-16	3 SYNM/NES/VIM
NFIC	2.21682e-20	0.415753	0.491	0.189	8.26141e-16	3 SYNM/NES/VIM
MT3.2	3.7011e-20	0.447905	0.983	0.656	1.37929e-15	3 SYNM/NES/VIM
MXRA7	4.4432e-20	0.442239	0.463	0.174	1.65585e-15	3 SYNM/NES/VIM
FAM131B.1	4.54603e-20	0.298741	0.366	0.118	1.69417e-15	3 SYNM/NES/VIM
CENPB	4.70314e-20	0.358068	0.269	0.074	1.75272e-15	3 SYNM/NES/VIM
SMAD3	7.35714e-20	0.264364	0.137	0.024	2.74179e-15	3 SYNM/NES/VIM
SUB1P3	9.90417e-20	0.343368	0.371	0.122	3.69099e-15	3 SYNM/NES/VIM
GATM.1	1.0521e-19	0.268747	0.634	0.266	3.92086e-15	3 SYNM/NES/VIM
ADAM9.1	1.39842e-19	0.348611	0.337	0.107	5.21149e-15	3 SYNM/NES/VIM
EXTL3	1.90144e-19	0.366271	0.274	0.079	7.08611e-15	3 SYNM/NES/VIM
MTCO2P12	2.17262e-19	0.397949	0.257	0.071	8.0967e-15	3 SYNM/NES/VIM
RNF187	3.02522e-19	0.341187	0.577	0.241	1.12741e-14	3 SYNM/NES/VIM
NME3	3.58063e-19	0.309037	0.509	0.198	1.33439e-14	3 SYNM/NES/VIM
AK4	3.87861e-19	0.3604	0.394	0.139	1.44544e-14	3 SYNM/NES/VIM
FTH1P7.1	4.15889e-19	0.372965	0.634	0.278	1.54989e-14	3 SYNM/NES/VIM
CHCHD2	4.72237e-19	0.566725	0.989	0.867	1.75989e-14	3 SYNM/NES/VIM
TLK1	5.15439e-19	0.282477	0.303	0.094	1.92089e-14	3 SYNM/NES/VIM
UGP2	6.07979e-19	0.300274	0.434	0.16	2.26576e-14	3 SYNM/NES/VIM
GAPDHP35	6.77425e-19	0.36823	0.537	0.215	2.52456e-14	3 SYNM/NES/VIM
NR2F2	7.36546e-19	0.274282	0.286	0.085	2.74489e-14	3 SYNM/NES/VIM
CPXM1	8.18562e-19	0.269547	0.303	0.092	3.05054e-14	3 SYNM/NES/VIM
COL28A1	9.75737e-19	0.369417	0.2	0.048	3.63628e-14	3 SYNM/NES/VIM
SDC3	9.9621e-19	0.286914	0.514	0.206	3.71258e-14	3 SYNM/NES/VIM
RASSF2	1.09918e-18	0.33246	0.463	0.179	4.0963e-14	3 SYNM/NES/VIM
MLEC	2.03671e-18	0.391307	0.451	0.178	7.59022e-14	3 SYNM/NES/VIM
FKBP1C	2.13066e-18	0.320803	0.446	0.165	7.94033e-14	3 SYNM/NES/VIM
FTH1P2.1	2.65263e-18	0.333729	0.577	0.24	9.88555e-14	3 SYNM/NES/VIM
DDR2	3.30943e-18	0.384893	0.206	0.052	1.23333e-13	3 SYNM/NES/VIM
ITGB8.1	3.39984e-18	0.285344	0.52	0.21	1.26702e-13	3 SYNM/NES/VIM
CDK14	3.5489e-18	0.3192	0.274	0.082	1.32257e-13	3 SYNM/NES/VIM
FTH1P8	4.19591e-18	0.466272	0.674	0.316	1.56369e-13	3 SYNM/NES/VIM
SCRN1	4.99229e-18	0.309654	0.491	0.192	1.86048e-13	3 SYNM/NES/VIM
TMSB4XP8	5.1517e-18	0.337757	0.589	0.251	1.91988e-13	3 SYNM/NES/VIM
HLA-H	6.12317e-18	0.303632	0.28	0.088	2.28192e-13	3 SYNM/NES/VIM
CLDN12	7.24839e-18	0.284064	0.303	0.096	2.70126e-13	3 SYNM/NES/VIM
APLP2	7.87623e-18	0.365237	0.674	0.312	2.93523e-13	3 SYNM/NES/VIM
VIM.2	8.95704e-18	0.328625	1	0.557	3.33802e-13	3 SYNM/NES/VIM
HIP1	1.04117e-17	0.332228	0.354	0.123	3.88014e-13	3 SYNM/NES/VIM
C21orf62	1.16542e-17	0.316952	0.183	0.044	4.34317e-13	3 SYNM/NES/VIM
BAZ1B	1.22877e-17	0.309633	0.469	0.183	4.57924e-13	3 SYNM/NES/VIM
EEF1A1P9	1.25198e-17	0.254957	0.389	0.136	4.66575e-13	3 SYNM/NES/VIM
PTN.1	1.32511e-17	0.463514	0.96	0.764	4.9383e-13	3 SYNM/NES/VIM
CALU	1.75876e-17	0.35609	0.56	0.245	6.55438e-13	3 SYNM/NES/VIM
EMILIN3	2.44201e-17	0.334196	0.177	0.042	9.10065e-13	3 SYNM/NES/VIM
CPVL	2.4533e-17	0.295624	0.274	0.083	9.1427e-13	3 SYNM/NES/VIM
EIF2S2	2.77026e-17	0.28787	0.686	0.325	1.03239e-12	3 SYNM/NES/VIM
APP	3.36216e-17	0.495962	0.754	0.425	1.25297e-12	3 SYNM/NES/VIM
MRPS26	5.36227e-17	0.306111	0.549	0.235	1.99836e-12	3 SYNM/NES/VIM
TIMP2	6.2399e-17	0.596432	0.737	0.378	2.32543e-12	3 SYNM/NES/VIM
RPL4P4	7.86847e-17	0.277398	0.491	0.2	2.93234e-12	3 SYNM/NES/VIM
MT-CYB.1	7.88269e-17	0.508147	0.554	0.26	2.93764e-12	3 SYNM/NES/VIM
NLK	9.43064e-17	0.266871	0.263	0.08	3.51452e-12	3 SYNM/NES/VIM
TAPBP	1.11772e-16	0.314769	0.349	0.125	4.16542e-12	3 SYNM/NES/VIM
SLC12A4	1.15234e-16	0.297243	0.211	0.057	4.29442e-12	3 SYNM/NES/VIM
SPATS2L.1	1.17092e-16	0.413117	0.417	0.165	4.36366e-12	3 SYNM/NES/VIM
PTPN14	1.17868e-16	0.300366	0.189	0.048	4.3926e-12	3 SYNM/NES/VIM
PI4KB	1.21416e-16	0.251504	0.257	0.077	4.52483e-12	3 SYNM/NES/VIM
PTPRZ1	1.31425e-16	0.510805	0.891	0.58	4.89781e-12	3 SYNM/NES/VIM
ATP1A2	1.46978e-16	0.428156	0.389	0.149	5.47743e-12	3 SYNM/NES/VIM
TRIP6.1	2.01317e-16	0.33504	0.377	0.141	7.50248e-12	3 SYNM/NES/VIM
BCAP29	2.26798e-16	0.348589	0.371	0.139	8.45209e-12	3 SYNM/NES/VIM
COL6A1.1	2.66592e-16	0.365324	0.297	0.098	9.93508e-12	3 SYNM/NES/VIM
RNF157	3.29175e-16	0.423607	0.331	0.118	1.22673e-11	3 SYNM/NES/VIM
PYCR2	3.68275e-16	0.280157	0.32	0.112	1.37245e-11	3 SYNM/NES/VIM
BCHE	4.38922e-16	0.315282	0.497	0.212	1.63573e-11	3 SYNM/NES/VIM
GDF15	4.40529e-16	0.489865	0.263	0.084	1.64172e-11	3 SYNM/NES/VIM
EMC10	4.43846e-16	0.36695	0.503	0.211	1.65408e-11	3 SYNM/NES/VIM
GAPDHP69	4.83191e-16	0.259189	0.389	0.145	1.80071e-11	3 SYNM/NES/VIM
RPS2P55	5.12139e-16	0.278132	0.314	0.106	1.90859e-11	3 SYNM/NES/VIM
CD63.1	5.39559e-16	0.380659	0.943	0.698	2.01078e-11	3 SYNM/NES/VIM
CXCL16	5.80174e-16	0.2991	0.229	0.067	2.16213e-11	3 SYNM/NES/VIM
B2M.2	5.92064e-16	0.442938	0.966	0.778	2.20644e-11	3 SYNM/NES/VIM
MAFB	6.69977e-16	0.351202	0.24	0.072	2.4968e-11	3 SYNM/NES/VIM
MT-RNR1	7.17003e-16	0.421045	0.497	0.216	2.67205e-11	3 SYNM/NES/VIM
CLDN10	1.29904e-15	0.252732	0.314	0.108	4.84113e-11	3 SYNM/NES/VIM
MTCO1P12	1.38593e-15	0.258058	0.234	0.069	5.16494e-11	3 SYNM/NES/VIM
ITGA7.1	1.38764e-15	0.39641	0.269	0.089	5.17131e-11	3 SYNM/NES/VIM
PDIA4	1.60181e-15	0.310783	0.583	0.273	5.96947e-11	3 SYNM/NES/VIM
XAF1	1.92703e-15	0.294079	0.189	0.05	7.18147e-11	3 SYNM/NES/VIM
KCNQ2.1	2.26277e-15	0.375856	0.566	0.26	8.43267e-11	3 SYNM/NES/VIM
ATP6V0E2.1	2.28343e-15	0.398634	0.657	0.345	8.50967e-11	3 SYNM/NES/VIM
CST3.2	2.29578e-15	0.37502	0.931	0.67	8.55566e-11	3 SYNM/NES/VIM
TNFAIP6	2.42514e-15	0.334936	0.229	0.069	9.03777e-11	3 SYNM/NES/VIM
TAGLN2.1	2.44951e-15	0.252613	0.486	0.203	9.12861e-11	3 SYNM/NES/VIM
RPL22L1	2.71299e-15	0.252685	0.589	0.267	1.01105e-10	3 SYNM/NES/VIM
SRM	2.91459e-15	0.300417	0.457	0.192	1.08618e-10	3 SYNM/NES/VIM
[truncated: 5,070 more rows]
