# Supplementary material for: Intermediate filaments promote glioblastoma cell invasion by controlling cell deformability and mechanosensitive gene expression
Source: Research Square preprint supplement (doi:10.21203/rs.3.rs-2828066/v1), 2023-06-29
Supplement: Supplementary file 3 [file 89f21b39b7505ce8144a6d96.xlsx]

## Sheet: Supp Table 4
gene	p_val	avg_logFC	pct.1	pct.2	p_val_adj	cluster	gene2
FAM177B	1.14127e-42	0.239738	0.082	0.015	4.25318e-38	2	FAM177B
IL32	1.51341e-41	0.190896	0.106	0.025	5.64003e-37	2	IL32
PI3	1.04677e-39	0.285612	0.066	0.011	3.90101e-35	2	PI3
SAA4	2.09192e-35	0.111686	0.044	0.005	7.79595e-31	2	SAA4
SAA3P	9.63377e-35	1.04529	0.075	0.016	3.59022e-30	2	SAA3P
NAMPTP1	1.38784e-31	0.118331	0.069	0.015	5.17207e-27	2	NAMPTP1
CXCL3	1.59851e-30	0.297526	0.07	0.015	5.95716e-26	2	CXCL3
PLA2G2A	2.20379e-28	0.457496	0.082	0.021	8.21285e-24	2	PLA2G2A
CXCL8	5.28612e-28	0.212911	0.063	0.013	1.96998e-23	2	CXCL8
TREM1	9.48474e-28	0.264879	0.048	0.008	3.53468e-23	2	TREM1
SLC16A3	3.66266e-27	0.121057	0.107	0.034	1.36496e-22	2	SLC16A3
SPOCD1	6.97147e-27	0.186345	0.129	0.046	2.59806e-22	2	SPOCD1
SLPI	2.03393e-26	0.469604	0.076	0.02	7.57984e-22	2	SLPI
CXCL2	4.48936e-26	0.468449	0.114	0.039	1.67305e-21	2	CXCL2
SAA2	1.28763e-25	0.919996	0.082	0.023	4.7986e-21	2	SAA2
MMP7	1.7993e-25	0.591854	0.042	0.007	6.70544e-21	2	MMP7
TAGLN	3.91406e-25	0.640956	0.129	0.049	1.45865e-20	2	TAGLN
FBLN5	5.06559e-25	0.223204	0.082	0.024	1.88779e-20	2	FBLN5
TNFAIP3	1.89891e-24	0.46277	0.106	0.036	7.07666e-20	2	TNFAIP3
S100A11	4.15585e-24	0.418723	0.183	0.084	1.54876e-19	2	S100A11
F13A1	9.63916e-24	0.413349	0.08	0.023	3.59222e-19	2	F13A1
FN1	7.63679e-23	0.706998	0.226	0.121	2.846e-18	2	FN1
GPRC5A	1.10154e-22	0.134812	0.042	0.008	4.10512e-18	2	GPRC5A
TNFAIP8L3	1.99037e-22	0.0823086	0.038	0.006	7.4175e-18	2	TNFAIP8L3
SAA1	2.76718e-22	0.848566	0.101	0.035	1.03124e-17	2	SAA1
ITGA5	2.8485e-22	0.345119	0.101	0.035	1.06155e-17	2	ITGA5
CD44	4.05527e-22	0.394372	0.244	0.13	1.51128e-17	2	CD44
PTX3	4.34694e-22	0.654617	0.119	0.046	1.61997e-17	2	PTX3
CHI3L2	5.67152e-22	0.753381	0.123	0.049	2.1136e-17	2	CHI3L2
C6orf141	1.48382e-21	0.104439	0.075	0.022	5.52977e-17	2	C6orf141
SLC39A8	1.79284e-21	0.173005	0.094	0.032	6.68139e-17	2	SLC39A8
MGST1	2.14537e-21	0.45462	0.2	0.101	7.99516e-17	2	MGST1
LTF	2.53518e-21	0.751459	0.098	0.035	9.44785e-17	2	LTF
PRSS23	2.74451e-21	0.286518	0.115	0.044	1.0228e-16	2	PRSS23
GBP2	4.60147e-21	0.238301	0.117	0.046	1.71483e-16	2	GBP2
RRAS	4.91482e-21	0.134276	0.108	0.04	1.83161e-16	2	RRAS
GLIPR1	6.76687e-21	0.204486	0.128	0.052	2.52181e-16	2	GLIPR1
APLNR	1.53699e-20	0.134331	0.06	0.016	5.72791e-16	2	APLNR
AHR	2.18316e-20	0.198338	0.141	0.061	8.13599e-16	2	AHR
COL1A2	2.30175e-20	0.127506	0.114	0.044	8.57792e-16	2	COL1A2
HMOX1	3.71125e-20	0.165519	0.068	0.02	1.38307e-15	2	HMOX1
HLA-DRB6	4.22451e-20	0.13377	0.053	0.013	1.57435e-15	2	HLA-DRB6
NFASC	1.40453e-19	0.285057	0.172	0.084	5.23427e-15	2	NFASC
GGT5	1.73493e-19	0.0915107	0.058	0.016	6.46557e-15	2	GGT5
CHRNA9	1.16523e-18	0.0920811	0.058	0.016	4.34247e-14	2	CHRNA9
VCAM1	2.82655e-18	0.169282	0.093	0.035	1.05337e-13	2	VCAM1
CP	3.91671e-18	0.350918	0.092	0.035	1.45964e-13	2	CP
ICAM1	6.12207e-18	0.323739	0.078	0.027	2.28151e-13	2	ICAM1
AHNAK2	6.77747e-18	0.107378	0.04	0.009	2.52576e-13	2	AHNAK2
TNFAIP2	2.01887e-17	0.239784	0.081	0.029	7.52371e-13	2	TNFAIP2
PTGS2	2.03438e-17	0.187751	0.062	0.019	7.58154e-13	2	PTGS2
BCAS1	3.27563e-17	0.568168	0.105	0.044	1.22073e-12	2	BCAS1
SLC39A14	3.84756e-17	0.473614	0.196	0.109	1.43387e-12	2	SLC39A14
ANXA1	5.55068e-17	0.236131	0.219	0.122	2.06857e-12	2	ANXA1
ELOA2	8.20047e-17	-0.0705927	0.083	0.03	3.05607e-12	2	ELOA2
PLP2	9.80701e-17	0.311374	0.149	0.073	3.65478e-12	2	PLP2
ELL2	1.68211e-16	0.110308	0.155	0.076	6.2687e-12	2	ELL2
SERPING1	2.09866e-16	0.317944	0.192	0.104	7.82108e-12	2	SERPING1
CAV1	2.7025e-16	0.6184	0.11	0.049	1.00714e-11	2	CAV1
GJA1	3.00996e-16	0.18004	0.179	0.094	1.12172e-11	2	GJA1
S100A1	3.14042e-16	0.519476	0.101	0.043	1.17034e-11	2	S100A1
MYL9	6.70414e-16	0.0645806	0.094	0.038	2.49843e-11	2	MYL9
S100A10	8.73428e-16	0.389647	0.272	0.172	3.255e-11	2	S100A10
FTL	9.4228e-16	0.350397	0.864	0.825	3.51159e-11	2	FTL
NNMT	1.09833e-15	0.360239	0.145	0.072	4.09315e-11	2	NNMT
COL6A2	1.37813e-15	0.157851	0.074	0.027	5.13587e-11	2	COL6A2
FAM110C	1.66965e-15	0.0581634	0.04	0.01	6.22227e-11	2	FAM110C
S100A4	1.80009e-15	0.0519555	0.037	0.009	6.70838e-11	2	S100A4
CD68	2.11494e-15	0.108019	0.074	0.027	7.88175e-11	2	CD68
HLA-DPA1	2.20983e-15	0.163131	0.084	0.033	8.23537e-11	2	HLA-DPA1
FLNA	2.3485e-15	0.432593	0.287	0.192	8.75216e-11	2	FLNA
MYC	2.77584e-15	0.237067	0.142	0.07	1.03447e-10	2	MYC
FOSL2	2.85025e-15	0.149883	0.137	0.067	1.0622e-10	2	FOSL2
H3F3B	3.68124e-15	-0.30506	0.803	0.822	1.37189e-10	2	H3F3B
ZC3H12A	6.37581e-15	0.102642	0.056	0.018	2.37607e-10	2	ZC3H12A
CA12	6.44601e-15	0.421011	0.167	0.09	2.40224e-10	2	CA12
IL1R1	8.83595e-15	0.0723687	0.041	0.011	3.29289e-10	2	IL1R1
LOX	1.13681e-14	0.448443	0.077	0.03	4.23653e-10	2	LOX
BIRC3	1.18195e-14	0.0712892	0.047	0.013	4.40479e-10	2	BIRC3
HLA-DRB5	1.26979e-14	0.139961	0.048	0.014	4.73212e-10	2	HLA-DRB5
CHI3L1	1.31908e-14	0.487172	0.329	0.23	4.91583e-10	2	CHI3L1
C1S	1.38174e-14	0.299082	0.173	0.095	5.14933e-10	2	C1S
ZDHHC9	1.78031e-14	0.246133	0.182	0.101	6.63469e-10	2	ZDHHC9
C1R	2.00231e-14	0.413334	0.22	0.135	7.46201e-10	2	C1R
C3	2.07903e-14	0.592687	0.132	0.066	7.74792e-10	2	C3
CNN2	2.39278e-14	0.121484	0.064	0.022	8.91717e-10	2	CNN2
SPSB1	3.08412e-14	0.0814657	0.08	0.032	1.14936e-09	2	SPSB1
FAM129B	6.15831e-14	0.0589752	0.081	0.032	2.29502e-09	2	FAM129B
UPP1	8.17743e-14	0.522487	0.181	0.104	3.04748e-09	2	UPP1
GALNT15	8.20488e-14	0.157836	0.074	0.028	3.05771e-09	2	GALNT15
MVP	8.57188e-14	0.0918682	0.085	0.035	3.19448e-09	2	MVP
GPX3	1.15962e-13	0.121435	0.065	0.024	4.32155e-09	2	GPX3
SDC4	2.31285e-13	0.163946	0.101	0.046	8.6193e-09	2	SDC4
DPYD	2.5239e-13	0.0524646	0.118	0.057	9.4058e-09	2	DPYD
BACE2	2.52652e-13	0.117454	0.062	0.022	9.41559e-09	2	BACE2
NRP2	2.85168e-13	0.225891	0.139	0.072	1.06274e-08	2	NRP2
AHNAK	6.05215e-13	0.186466	0.119	0.059	2.25546e-08	2	AHNAK
ETV1	7.83551e-13	-0.32292	0.224	0.348	2.92006e-08	2	ETV1
CKB	8.91013e-13	-0.282321	0.684	0.744	3.32054e-08	2	CKB
RDH10	9.03813e-13	0.222469	0.14	0.074	3.36824e-08	2	RDH10
AKAP12	1.26203e-12	0.28102	0.179	0.102	4.70322e-08	2	AKAP12
CAPG	1.49167e-12	0.0884658	0.106	0.05	5.55901e-08	2	CAPG
TC2N	1.90793e-12	0.0524401	0.035	0.009	7.1103e-08	2	TC2N
SERPINE1	2.43657e-12	0.707936	0.136	0.074	9.08035e-08	2	SERPINE1
RGS2	2.80198e-12	0.406706	0.196	0.119	1.04421e-07	2	RGS2
ANXA2P2	4.03733e-12	0.0791895	0.145	0.079	1.50459e-07	2	ANXA2P2
CCL2	4.15455e-12	0.470747	0.131	0.07	1.54828e-07	2	CCL2
LGALS3	4.70376e-12	0.312851	0.356	0.26	1.75295e-07	2	LGALS3
DBI	7.42136e-12	-0.26685	0.827	0.839	2.76572e-07	2	DBI
CA9	7.80615e-12	0.185416	0.105	0.051	2.90912e-07	2	CA9
TF	1.10688e-11	0.303211	0.095	0.045	4.12501e-07	2	TF
NFKBIZ	1.49985e-11	0.262819	0.148	0.083	5.58951e-07	2	NFKBIZ
KLF5	1.63025e-11	0.0515679	0.035	0.01	6.07547e-07	2	KLF5
IGFBP6	1.7547e-11	0.0838086	0.054	0.02	6.53923e-07	2	IGFBP6
HLA-DRB1	1.89319e-11	0.255145	0.084	0.038	7.05533e-07	2	HLA-DRB1
PLOD1	2.17941e-11	0.333432	0.161	0.094	8.12199e-07	2	PLOD1
SPRED3	2.37947e-11	0.0650068	0.049	0.017	8.86759e-07	2	SPRED3
TGFBI	2.8524e-11	0.291244	0.071	0.03	1.063e-06	2	TGFBI
MYRF	3.46935e-11	0.241801	0.055	0.021	1.29292e-06	2	MYRF
CFLAR	4.53599e-11	0.190289	0.172	0.103	1.69043e-06	2	CFLAR
NOS2	5.23821e-11	-0.29093	0.069	0.152	1.95212e-06	2	NOS2
TNC	5.82621e-11	0.557184	0.264	0.185	2.17125e-06	2	TNC
EGLN3	7.23364e-11	0.231266	0.11	0.057	2.69576e-06	2	EGLN3
C1orf61	7.52777e-11	-0.303577	0.799	0.826	2.80537e-06	2	C1orf61
TRIB1	8.91309e-11	0.119876	0.111	0.057	3.32164e-06	2	TRIB1
ATP1A2	9.5668e-11	-0.439706	0.107	0.196	3.56526e-06	2	ATP1A2
ACTN1	1.25295e-10	0.35175	0.244	0.17	4.66935e-06	2	ACTN1
SRPX2	1.3509e-10	0.0959743	0.062	0.025	5.0344e-06	2	SRPX2
LAPTM5	1.52146e-10	0.0518684	0.045	0.016	5.67003e-06	2	LAPTM5
ITGB5	1.57546e-10	0.0506685	0.055	0.021	5.87128e-06	2	ITGB5
EMP3	1.73364e-10	0.178589	0.197	0.124	6.46077e-06	2	EMP3
CSPG5	1.88264e-10	-0.238193	0.127	0.222	7.01602e-06	2	CSPG5
CALM1	2.16671e-10	-0.236293	0.701	0.729	8.07466e-06	2	CALM1
MAN1C1	2.38292e-10	0.121942	0.106	0.055	8.88041e-06	2	MAN1C1
DUSP23	2.55812e-10	0.0674759	0.054	0.021	9.53335e-06	2	DUSP23
APOC1P1	2.57419e-10	0.0701093	0.043	0.015	9.59322e-06	2	APOC1P1
FHL2	2.84069e-10	0.0803154	0.039	0.013	1.05864e-05	2	FHL2
CXCL14	3.83429e-10	0.206485	0.152	0.088	1.42892e-05	2	CXCL14
CD74	4.71181e-10	0.351245	0.139	0.081	1.75595e-05	2	CD74
CLDN11	5.20655e-10	0.560525	0.121	0.068	1.94033e-05	2	CLDN11
FBXO32	6.55622e-10	0.181526	0.122	0.068	2.44331e-05	2	FBXO32
PADI2	7.53229e-10	0.214936	0.073	0.033	2.80706e-05	2	PADI2
TCIM	7.60025e-10	0.361475	0.155	0.095	2.83238e-05	2	TCIM
MYOF	8.02264e-10	0.0969203	0.064	0.028	2.9898e-05	2	MYOF
CD2AP	9.80719e-10	0.0667074	0.063	0.027	3.65485e-05	2	CD2AP
LIF	9.98093e-10	0.126902	0.032	0.01	3.7196e-05	2	LIF
MT1HL1	1.02874e-09	0.0993429	0.068	0.03	3.83379e-05	2	MT1HL1
S100A6	1.09251e-09	0.431864	0.613	0.565	4.07144e-05	2	S100A6
OSMR	1.13099e-09	0.124722	0.124	0.069	4.21487e-05	2	OSMR
SHC1	1.14502e-09	0.237861	0.172	0.105	4.26713e-05	2	SHC1
RELB	1.91954e-09	0.0721772	0.054	0.022	7.15354e-05	2	RELB
PTGDS	1.93657e-09	0.469299	0.135	0.081	7.217e-05	2	PTGDS
DLX6-AS1	2.00263e-09	0.609346	0.088	0.045	7.46322e-05	2	DLX6-AS1
ITPKC	2.08186e-09	0.119073	0.077	0.037	7.75847e-05	2	ITPKC
GLRX	2.13549e-09	0.213607	0.16	0.098	7.95834e-05	2	GLRX
PTPRN	2.58302e-09	0.213789	0.071	0.033	9.62615e-05	2	PTPRN
SPP1	2.59265e-09	0.39987	0.271	0.195	9.66204e-05	2	SPP1
SOD2	2.61933e-09	0.715752	0.305	0.245	9.76144e-05	2	SOD2
ITGA3	2.76668e-09	0.0949047	0.079	0.038	0.000103106	2	ITGA3
FADS3	2.82115e-09	0.13595	0.104	0.056	0.000105136	2	FADS3
PYGL	2.86879e-09	0.253439	0.13	0.075	0.000106911	2	PYGL
SUN2	2.92908e-09	0.224557	0.153	0.093	0.000109158	2	SUN2
EFEMP1	3.32064e-09	0.387416	0.221	0.154	0.00012375	2	EFEMP1
PFKFB4	3.32131e-09	0.124134	0.054	0.022	0.000123775	2	PFKFB4
HLA-DRA	3.40573e-09	0.303858	0.115	0.065	0.000126922	2	HLA-DRA
OLIG1	3.84365e-09	-0.368998	0.262	0.367	0.000143241	2	OLIG1
BCL3	3.95222e-09	0.0754058	0.071	0.034	0.000147287	2	BCL3
ACTB	4.10376e-09	0.176587	0.981	0.972	0.000152935	2	ACTB
P4HA2	5.73661e-09	0.0789642	0.056	0.024	0.000213786	2	P4HA2
FZD7	5.84267e-09	0.0611079	0.084	0.042	0.000217739	2	FZD7
MYH9	6.07927e-09	0.0783177	0.145	0.086	0.000226556	2	MYH9
ESYT1	6.10455e-09	0.0892438	0.088	0.045	0.000227498	2	ESYT1
TGM2	6.1599e-09	0.0567206	0.027	0.008	0.000229561	2	TGM2
GEM	7.22305e-09	0.0772438	0.123	0.07	0.000269181	2	GEM
ANXA2	7.94274e-09	0.414725	0.266	0.198	0.000296002	2	ANXA2
CCN1	8.10449e-09	0.545407	0.2	0.138	0.00030203	2	CCN1
TNFRSF12A	8.28202e-09	0.228578	0.193	0.127	0.000308646	2	TNFRSF12A
PPP1R18	8.68415e-09	0.101988	0.116	0.065	0.000323632	2	PPP1R18
PPP1R16B	9.12416e-09	0.164677	0.04	0.015	0.00034003	2	PPP1R16B
FAM102A	1.12934e-08	0.206297	0.105	0.058	0.000420872	2	FAM102A
INAFM1	1.21763e-08	0.237527	0.181	0.118	0.000453774	2	INAFM1
POU3F3	1.32892e-08	-0.194816	0.183	0.278	0.00049525	2	POU3F3
SYTL2	1.5447e-08	0.081141	0.096	0.051	0.000575665	2	SYTL2
NAMPT	1.55361e-08	0.47359	0.249	0.187	0.000578985	2	NAMPT
PIM1	1.56571e-08	0.238482	0.098	0.053	0.000583491	2	PIM1
COL8A1	1.59655e-08	0.11087	0.058	0.026	0.000594987	2	COL8A1
NPNT	1.6912e-08	0.091548	0.082	0.042	0.000630261	2	NPNT
RND3	1.74705e-08	0.246388	0.182	0.119	0.000651071	2	RND3
CDKN2A	1.77335e-08	0.210249	0.228	0.156	0.000660873	2	CDKN2A
ITGB1	2.06597e-08	0.191057	0.233	0.165	0.000769926	2	ITGB1
GBP1	2.31868e-08	0.132719	0.131	0.078	0.000864101	2	GBP1
LANCL2	2.42958e-08	-0.178156	0.246	0.34	0.00090543	2	LANCL2
CCND2	2.56379e-08	-0.273173	0.378	0.475	0.000955449	2	CCND2
SLC22A23	2.83012e-08	0.0910593	0.087	0.045	0.0010547	2	SLC22A23
KCNQ2	3.26101e-08	-0.209301	0.206	0.303	0.00121528	2	KCNQ2
MTCO2P22	3.66369e-08	0.0770459	0.058	0.027	0.00136535	2	MTCO2P22
HAS2	4.12734e-08	0.103773	0.089	0.047	0.00153814	2	HAS2
PTN	4.2476e-08	-0.170591	0.804	0.81	0.00158295	2	PTN
PTPRZ1	4.41436e-08	-0.223094	0.611	0.661	0.0016451	2	PTPRZ1
MOG	4.42045e-08	0.165373	0.038	0.014	0.00164737	2	MOG
TMEM176A	4.44429e-08	-0.196411	0.103	0.176	0.00165625	2	TMEM176A
SLC38A5	4.54219e-08	0.0977398	0.05	0.021	0.00169274	2	SLC38A5
LGALS1	4.7876e-08	0.376928	0.443	0.395	0.00178419	2	LGALS1
RNASE4	5.07491e-08	0.061561	0.035	0.013	0.00189126	2	RNASE4
PLAUR	5.55482e-08	0.110469	0.06	0.028	0.00207011	2	PLAUR
GPR17	5.69714e-08	0.256351	0.065	0.032	0.00212315	2	GPR17
TPM2	5.87407e-08	0.258789	0.123	0.074	0.00218909	2	TPM2
SUSD6	6.00662e-08	0.0931653	0.073	0.036	0.00223849	2	SUSD6
CD83	6.06631e-08	0.117277	0.073	0.036	0.00226073	2	CD83
SNX10	6.17482e-08	0.141968	0.148	0.094	0.00230117	2	SNX10
ZNF488	6.24308e-08	0.142504	0.038	0.015	0.00232661	2	ZNF488
BHLHE41	6.28689e-08	0.138684	0.103	0.058	0.00234293	2	BHLHE41
MET	7.70062e-08	0.0804165	0.045	0.019	0.00286979	2	MET
PRRT3	7.7108e-08	0.0795047	0.061	0.029	0.00287358	2	PRRT3
CAMK2B	8.34858e-08	-0.179319	0.073	0.138	0.00311127	2	CAMK2B
GNG11	8.77778e-08	-0.107974	0.08	0.147	0.00327122	2	GNG11
S100A13	9.71871e-08	0.202888	0.226	0.162	0.00362187	2	S100A13
SLC4A7	1.05085e-07	0.0758154	0.128	0.077	0.0039162	2	SLC4A7
ACTG1	1.06011e-07	0.143273	0.904	0.891	0.0039507	2	ACTG1
SEC14L1	1.11664e-07	-0.230268	0.11	0.18	0.00416137	2	SEC14L1
CADPS	1.13522e-07	0.190236	0.091	0.05	0.00423061	2	CADPS
KRT75	1.14465e-07	0.0739436	0.017	0.004	0.00426577	2	KRT75
DPP6	1.14983e-07	-0.192747	0.123	0.199	0.00428507	2	DPP6
SAT1	1.19169e-07	0.548891	0.315	0.259	0.00444106	2	SAT1
RPL34P27	1.29842e-07	0.106807	0.111	0.065	0.00483881	2	RPL34P27
HK2	1.32319e-07	0.0660254	0.079	0.042	0.00493112	2	HK2
CHCHD2P5	1.37104e-07	-0.114021	0.088	0.159	0.00510946	2	CHCHD2P5
TFR2	1.37746e-07	0.114997	0.055	0.026	0.00513339	2	TFR2
SOCS3	1.3784e-07	0.123488	0.137	0.085	0.00513687	2	SOCS3
RASSF2	1.44717e-07	-0.213321	0.159	0.237	0.00539317	2	RASSF2
SQSTM1	1.52298e-07	0.444507	0.371	0.311	0.0056757	2	SQSTM1
CCT6P4	1.59076e-07	-0.101962	0.048	0.104	0.00592829	2	CCT6P4
LINGO1	1.64628e-07	-0.126659	0.081	0.149	0.0061352	2	LINGO1
SYNPO	1.7385e-07	0.0759473	0.07	0.036	0.00647888	2	SYNPO
MYADM	1.8261e-07	0.119316	0.158	0.103	0.00680532	2	MYADM
MLC1	1.82975e-07	-0.243721	0.222	0.302	0.00681892	2	MLC1
EGFR	1.83283e-07	-0.273925	0.468	0.54	0.00683041	2	EGFR
GBE1	1.9888e-07	0.138059	0.147	0.093	0.00741167	2	GBE1
HILPDA	2.0885e-07	0.354195	0.152	0.098	0.00778319	2	HILPDA
A2M	2.10133e-07	0.327119	0.177	0.123	0.00783103	2	A2M
TMBIM1	2.17279e-07	0.0791034	0.144	0.09	0.00809734	2	TMBIM1
HAPLN1	2.20854e-07	-0.125585	0.008	0.042	0.00823055	2	HAPLN1
NRP1	2.23125e-07	0.174801	0.115	0.068	0.00831521	2	NRP1
RPH3A	2.37471e-07	-0.0999414	0.063	0.124	0.00884983	2	RPH3A
WASF3	2.43963e-07	-0.099922	0.075	0.138	0.00909179	2	WASF3
FXYD6	2.57968e-07	-0.0986284	0.468	0.582	0.00961369	2	FXYD6
SEZ6L	2.74658e-07	-0.185055	0.043	0.095	0.0102357	2	SEZ6L
CREB5	2.82503e-07	-0.240297	0.13	0.2	0.0105281	2	CREB5
VKORC1	2.9355e-07	0.205718	0.329	0.262	0.0109397	2	VKORC1
NLGN3	2.97988e-07	-0.153715	0.098	0.166	0.0111051	2	NLGN3
FOXRED2	3.08714e-07	-0.188801	0.062	0.118	0.0115048	2	FOXRED2
APOL2	3.09644e-07	0.0727944	0.141	0.089	0.0115395	2	APOL2
APOC1	3.22264e-07	0.0865384	0.091	0.051	0.0120098	2	APOC1
WARS	3.34545e-07	0.107003	0.181	0.122	0.0124675	2	WARS
ANGPTL4	3.44993e-07	0.259747	0.071	0.037	0.0128568	2	ANGPTL4
TRIL	3.58794e-07	-0.130253	0.045	0.098	0.0133712	2	TRIL
CLIC1	3.7781e-07	0.240169	0.208	0.146	0.0140798	2	CLIC1
BCHE	3.92571e-07	-0.202984	0.181	0.259	0.0146299	2	BCHE
RRP9	3.92915e-07	0.122674	0.098	0.057	0.0146428	2	RRP9
HAP1	3.94712e-07	0.223033	0.227	0.161	0.0147097	2	HAP1
CPVL	4.53362e-07	-0.205881	0.061	0.115	0.0168955	2	CPVL
ADGRB1	4.57271e-07	-0.145016	0.07	0.132	0.0170411	2	ADGRB1
C4orf48	4.92319e-07	0.220825	0.398	0.32	0.0183473	2	C4orf48
IL6	5.01966e-07	0.0702629	0.036	0.014	0.0187068	2	IL6
CHCHD2P8	5.10063e-07	-0.168712	0.245	0.335	0.0190085	2	CHCHD2P8
CHCHD2P2	5.91927e-07	-0.158399	0.168	0.25	0.0220593	2	CHCHD2P2
GPRC5B	6.13145e-07	-0.220154	0.213	0.293	0.0228501	2	GPRC5B
CNTN1	6.58838e-07	-0.148021	0.061	0.116	0.0245529	2	CNTN1
RND2	6.59028e-07	0.262816	0.213	0.156	0.02456	2	RND2
ZBTB7A	6.60641e-07	0.0736261	0.113	0.068	0.0246201	2	ZBTB7A
CCT6P2	7.48748e-07	-0.220568	0.208	0.285	0.0279036	2	CCT6P2
ADM	7.81966e-07	0.43489	0.13	0.082	0.0291415	2	ADM
RAMP1	8.30775e-07	-0.160336	0.288	0.376	0.0309605	2	RAMP1
SLC2A1	8.87918e-07	0.637253	0.175	0.124	0.03309	2	SLC2A1
FOSL1	9.63465e-07	0.106351	0.043	0.019	0.0359054	2	FOSL1
CDKN2B	1.01254e-06	0.137728	0.06	0.03	0.0377344	2	CDKN2B
RPL36AP39	1.08951e-06	0.0694534	0.064	0.033	0.0406027	2	RPL36AP39
CCN3	1.11644e-06	0.147	0.027	0.01	0.0416065	2	CCN3
SLC1A2	1.3141e-06	-0.234272	0.117	0.181	0.0489727	2	SLC1A2
COL6A3	1.34488e-06	0.0882279	0.068	0.036	0.0501197	2	COL6A3
TRIO	1.54699e-06	-0.222066	0.223	0.299	0.0576517	2	TRIO
ACSL4	1.54761e-06	0.0698655	0.08	0.045	0.0576749	2	ACSL4
FTH1	1.56073e-06	0.143331	0.985	0.969	0.0581638	2	FTH1
MAG	1.60399e-06	0.148744	0.025	0.009	0.0597759	2	MAG
PLBD2	1.6874e-06	0.0951062	0.094	0.056	0.0628844	2	PLBD2
MYO10	1.88464e-06	-0.111788	0.102	0.167	0.0702348	2	MYO10
RNF157	1.95062e-06	-0.194074	0.095	0.155	0.0726936	2	RNF157
PDLIM4	1.95615e-06	0.130754	0.157	0.105	0.0728999	2	PDLIM4
SYT11	2.00528e-06	-0.236522	0.365	0.44	0.0747308	2	SYT11
PANTR1	2.01023e-06	-0.136347	0.134	0.205	0.0749152	2	PANTR1
TUBB4A	2.10894e-06	0.319115	0.13	0.087	0.0785938	2	TUBB4A
MT1H	2.23315e-06	0.0955153	0.082	0.047	0.0832227	2	MT1H
CPNE7	2.36406e-06	0.0522305	0.011	0.002	0.0881013	2	CPNE7
DBIP1	2.69006e-06	-0.226753	0.262	0.33	0.10025	2	DBIP1
GAP43	2.70129e-06	0.230705	0.39	0.328	0.100669	2	GAP43
GATM	2.777e-06	-0.177527	0.278	0.357	0.103491	2	GATM
CPD	2.79243e-06	0.120493	0.113	0.071	0.104066	2	CPD
SNHG19	2.93506e-06	-0.183827	0.06	0.11	0.109381	2	SNHG19
IFITM2	2.96349e-06	0.168456	0.141	0.094	0.11044	2	IFITM2
NCOA7	3.00639e-06	0.0574823	0.071	0.039	0.112039	2	NCOA7
SYNGR2	3.01536e-06	0.0753927	0.07	0.038	0.112374	2	SYNGR2
GPC1	3.06583e-06	0.161832	0.216	0.158	0.114254	2	GPC1
TMEM45A	3.09854e-06	0.0627283	0.074	0.041	0.115473	2	TMEM45A
FLNC	3.15833e-06	0.0993224	0.08	0.045	0.117702	2	FLNC
JUNB	3.23127e-06	0.354473	0.321	0.262	0.12042	2	JUNB
RGS17	3.38792e-06	0.101142	0.06	0.031	0.126258	2	RGS17
IRF1	3.68909e-06	0.0891865	0.106	0.066	0.137481	2	IRF1
CDH6	3.78674e-06	-0.108128	0.061	0.112	0.14112	2	CDH6
GAPDHP63	3.90916e-06	-0.176053	0.24	0.323	0.145683	2	GAPDHP63
MYLK	3.93852e-06	0.10974	0.067	0.036	0.146777	2	MYLK
RGS12	4.21751e-06	-0.168631	0.073	0.124	0.157174	2	RGS12
ACSS3	4.26545e-06	0.0803461	0.077	0.044	0.158961	2	ACSS3
HSD3B7	4.51207e-06	0.0695535	0.047	0.022	0.168151	2	HSD3B7
TXN	4.81407e-06	0.22691	0.519	0.467	0.179406	2	TXN
PREB	4.82314e-06	0.149103	0.176	0.126	0.179744	2	PREB
CCT6P3	4.93261e-06	-0.182567	0.128	0.19	0.183824	2	CCT6P3
SLC2A3	5.03306e-06	0.14832	0.172	0.119	0.187567	2	SLC2A3
MT1L	5.08833e-06	0.146699	0.207	0.149	0.189627	2	MT1L
TGFB1I1	5.14285e-06	0.0921199	0.093	0.056	0.191659	2	TGFB1I1
SCN11A	5.15592e-06	-0.181627	0.404	0.471	0.192146	2	SCN11A
NIPSNAP2	5.19047e-06	-0.187335	0.463	0.53	0.193433	2	NIPSNAP2
FTLP3	5.20762e-06	0.28549	0.41	0.364	0.194072	2	FTLP3
ATP13A3	5.35414e-06	0.0549615	0.152	0.101	0.199533	2	ATP13A3
NPPA	5.56468e-06	-0.283238	0.029	0.067	0.207379	2	NPPA
KCNN4	5.60547e-06	0.0505537	0.032	0.014	0.208899	2	KCNN4
FAM114A1	5.6543e-06	0.0781076	0.082	0.048	0.210719	2	FAM114A1
SGK1	5.68821e-06	0.091284	0.184	0.13	0.211982	2	SGK1
ABCA1	5.69734e-06	0.124745	0.185	0.131	0.212323	2	ABCA1
EYA2	5.75349e-06	-0.122125	0.034	0.074	0.214415	2	EYA2
SPRY2	5.83476e-06	-0.256009	0.141	0.199	0.217444	2	SPRY2
CDH10	5.90946e-06	-0.179605	0.025	0.061	0.220228	2	CDH10
PPDPFL	5.92686e-06	-0.374851	0.012	0.042	0.220876	2	PPDPFL
LRP4	5.98566e-06	-0.132314	0.067	0.117	0.223068	2	LRP4
RBMS3-AS3	6.01608e-06	0.0533649	0.009	0.002	0.224201	2	RBMS3-AS3
NFKBIA	6.09236e-06	0.475911	0.276	0.228	0.227044	2	NFKBIA
CNIH2	6.2015e-06	-0.0508099	0.047	0.093	0.231111	2	CNIH2
DAPK3	6.36778e-06	0.0768499	0.114	0.072	0.237308	2	DAPK3
RNF10	6.44425e-06	0.161388	0.205	0.151	0.240158	2	RNF10
TMSB10	6.73197e-06	0.110133	0.943	0.922	0.25088	2	TMSB10
SOX2-OT	7.00455e-06	-0.149201	0.312	0.398	0.261039	2	SOX2-OT
SHISA6	7.34693e-06	-0.10345	0.01	0.039	0.273798	2	SHISA6
FTLP2	7.41357e-06	0.243062	0.194	0.145	0.276281	2	FTLP2
ADGRG1	7.4851e-06	-0.275156	0.289	0.354	0.278947	2	ADGRG1
BEST1	7.66321e-06	0.163726	0.173	0.123	0.285585	2	BEST1
ADARB1	7.7281e-06	0.0580866	0.035	0.015	0.288003	2	ADARB1
H3F3C	7.83102e-06	-0.102348	0.128	0.19	0.291839	2	H3F3C
NKAIN4	8.04109e-06	-0.124848	0.137	0.204	0.299667	2	NKAIN4
PIEZO1	8.14227e-06	0.0977887	0.078	0.045	0.303438	2	PIEZO1
CXCL13	8.38189e-06	0.116885	0.004	0	0.312368	2	CXCL13
ALDOC	8.72386e-06	-0.484818	0.166	0.224	0.325112	2	ALDOC
STEAP3	9.13493e-06	0.0951489	0.106	0.066	0.340432	2	STEAP3
ZNF267	9.16648e-06	0.0742977	0.05	0.025	0.341607	2	ZNF267
SEMA5B	9.17118e-06	0.295232	0.118	0.079	0.341782	2	SEMA5B
IQGAP1	9.27889e-06	0.104843	0.177	0.126	0.345796	2	IQGAP1
PNMA8A	9.31751e-06	-0.102641	0.041	0.083	0.347236	2	PNMA8A
TRDC	9.74272e-06	-0.105423	0.022	0.056	0.363082	2	TRDC
CYSTM1	9.74433e-06	0.178943	0.235	0.179	0.363142	2	CYSTM1
PDGFA	9.75887e-06	-0.137692	0.117	0.177	0.363684	2	PDGFA
GFPT2	9.7878e-06	0.0907937	0.084	0.05	0.364762	2	GFPT2
MPPED2	9.90187e-06	-0.0986849	0.011	0.04	0.369013	2	MPPED2
VAT1	1.00438e-05	0.169928	0.21	0.155	0.374303	2	VAT1
ASL	1.03377e-05	0.0678676	0.117	0.075	0.385254	2	ASL
UGCG	1.03718e-05	0.0772881	0.105	0.066	0.386526	2	UGCG
PLCG1	1.14558e-05	-0.151643	0.085	0.137	0.426925	2	PLCG1
OS9	1.14949e-05	0.153973	0.393	0.32	0.428379	2	OS9
LAMB1	1.18419e-05	0.122822	0.101	0.063	0.441314	2	LAMB1
VCL	1.18968e-05	0.0671194	0.108	0.069	0.443359	2	VCL
BLVRB	1.20218e-05	0.142204	0.154	0.107	0.448017	2	BLVRB
TBXAS1	1.21035e-05	0.0683264	0.022	0.008	0.451061	2	TBXAS1
SEZ6L2	1.25296e-05	0.103044	0.135	0.09	0.466941	2	SEZ6L2
PLIN2	1.26296e-05	0.13074	0.088	0.053	0.470668	2	PLIN2
PFN2	1.28976e-05	0.174025	0.469	0.393	0.480654	2	PFN2
VMP1	1.31753e-05	0.249728	0.235	0.182	0.491004	2	VMP1
B3GAT1	1.35625e-05	-0.0701575	0.08	0.135	0.505434	2	B3GAT1
MARVELD1	1.37763e-05	0.166373	0.079	0.047	0.513402	2	MARVELD1
TPM4	1.41005e-05	0.309199	0.274	0.222	0.525483	2	TPM4
MASP1	1.43357e-05	-0.204419	0.042	0.082	0.534247	2	MASP1
PPP1R15A	1.57255e-05	0.31487	0.213	0.162	0.586043	2	PPP1R15A
FTLP8	1.58852e-05	0.0742014	0.043	0.021	0.591993	2	FTLP8
ST3GAL5	1.59465e-05	0.143944	0.231	0.176	0.59428	2	ST3GAL5
SUMF1	1.65153e-05	0.0832442	0.074	0.043	0.615477	2	SUMF1
TMEM176B	1.66706e-05	-0.120559	0.168	0.238	0.621262	2	TMEM176B
CHCHD2P11	1.75162e-05	-0.067269	0.044	0.088	0.652775	2	CHCHD2P11
TFDP2	1.81461e-05	-0.155553	0.066	0.112	0.676252	2	TFDP2
TMEM123	1.81873e-05	0.104295	0.193	0.141	0.677786	2	TMEM123
FMC1	1.82669e-05	-0.154863	0.221	0.295	0.680752	2	FMC1
CHCHD2P3	1.82697e-05	-0.0856354	0.104	0.164	0.680857	2	CHCHD2P3
CSRNP3	1.82727e-05	-0.0921041	0.027	0.062	0.680968	2	CSRNP3
SLC6A1	1.83109e-05	-0.0869066	0.052	0.096	0.682393	2	SLC6A1
LFNG	1.92204e-05	-0.138527	0.127	0.187	0.716287	2	LFNG
TPP1	2.02223e-05	0.282055	0.215	0.163	0.753624	2	TPP1
PREX1	2.0276e-05	-0.126404	0.135	0.197	0.755626	2	PREX1
NPC2	2.05524e-05	0.165264	0.238	0.184	0.765925	2	NPC2
OCIAD2	2.06147e-05	0.23659	0.3	0.248	0.768248	2	OCIAD2
SRXN1	2.06437e-05	0.129123	0.036	0.016	0.769328	2	SRXN1
CASP4	2.09075e-05	0.0826248	0.08	0.048	0.779159	2	CASP4
PLXND1	2.09427e-05	0.0677208	0.073	0.042	0.780473	2	PLXND1
CLDN10	2.15572e-05	-0.100952	0.09	0.143	0.80337	2	CLDN10
GLB1	2.1849e-05	0.0615292	0.118	0.078	0.814246	2	GLB1
STC2	2.35838e-05	0.123101	0.06	0.033	0.878898	2	STC2
KAZN	2.46133e-05	0.182412	0.128	0.087	0.917265	2	KAZN
SPOCK2	2.46849e-05	0.108711	0.132	0.09	0.919932	2	SPOCK2
NUMBL	2.49363e-05	0.122149	0.096	0.061	0.929301	2	NUMBL
MIR210HG	2.53933e-05	0.0838872	0.065	0.037	0.94633	2	MIR210HG
PSD2	2.60301e-05	-0.139282	0.025	0.058	0.970063	2	PSD2
ENDOD1	2.65514e-05	0.0829511	0.105	0.067	0.989491	2	ENDOD1
FAM84A	2.75562e-05	-0.134276	0.08	0.129	1	2	FAM84A
EMILIN3	2.81219e-05	-0.0942201	0.029	0.065	1	2	EMILIN3
KLHDC8A	2.81797e-05	-0.132262	0.108	0.163	1	2	KLHDC8A
UBE2D4	2.93865e-05	-0.166334	0.113	0.166	1	2	UBE2D4
PARK7	2.95656e-05	0.0724985	0.397	0.316	1	2	PARK7
CSRP1	2.96985e-05	0.0731294	0.121	0.081	1	2	CSRP1
MALAT1	2.97155e-05	0.253596	0.765	0.732	1	2	MALAT1
HOPX	3.02852e-05	-0.1176	0.258	0.331	1	2	HOPX
TUBA1C	3.10744e-05	0.212207	0.346	0.301	1	2	TUBA1C
CLIP1	3.12488e-05	0.14512	0.173	0.126	1	2	CLIP1
SERPINA3	3.13243e-05	-0.108994	0.077	0.045	1	2	SERPINA3
MT3	3.15201e-05	-0.145753	0.695	0.731	1	2	MT3
LHFPL2	3.18206e-05	0.0958169	0.05	0.026	1	2	LHFPL2
NCAN	3.22772e-05	-0.208271	0.101	0.153	1	2	NCAN
PML	3.3597e-05	0.0975532	0.07	0.041	1	2	PML
GLIS3	3.45581e-05	0.0834199	0.082	0.051	1	2	GLIS3
ZNF713	3.45654e-05	-0.0954407	0.068	0.115	1	2	ZNF713
CPEB4	3.46859e-05	-0.17771	0.129	0.183	1	2	CPEB4
SLC25A37	3.4721e-05	0.102875	0.144	0.1	1	2	SLC25A37
E2F3	3.62104e-05	0.234286	0.148	0.107	1	2	E2F3
CXCR4	3.6234e-05	0.120634	0.076	0.045	1	2	CXCR4
ACYP1	3.68141e-05	-0.142812	0.084	0.133	1	2	ACYP1
PROS1	3.69443e-05	0.0583684	0.117	0.077	1	2	PROS1
CDC42EP4	3.71135e-05	-0.106101	0.139	0.196	1	2	CDC42EP4
SUMF2	3.73937e-05	-0.20207	0.492	0.538	1	2	SUMF2
HSPA2	3.87033e-05	-0.0954836	0.07	0.117	1	2	HSPA2
CHCHD2	3.89234e-05	-0.161273	0.912	0.894	1	2	CHCHD2
LINC00461	3.97125e-05	-0.15549	0.137	0.196	1	2	LINC00461
TUBB6	3.97572e-05	0.19159	0.103	0.068	1	2	TUBB6
SLC1A3	4.03429e-05	-0.281778	0.305	0.369	1	2	SLC1A3
MCL1	4.04007e-05	0.159658	0.304	0.251	1	2	MCL1
LGI3	4.1298e-05	0.116081	0.03	0.013	1	2	LGI3
CX3CL1	4.15794e-05	0.158096	0.077	0.047	1	2	CX3CL1
IFFO2	4.26597e-05	0.0512687	0.054	0.029	1	2	IFFO2
NFATC4	4.52543e-05	0.0623593	0.031	0.014	1	2	NFATC4
PLOD3	4.57798e-05	0.235959	0.179	0.135	1	2	PLOD3
SALL3	4.65523e-05	-0.158951	0.052	0.092	1	2	SALL3
PMM2	4.75066e-05	0.0614719	0.051	0.027	1	2	PMM2
PCMTD2	4.81538e-05	-0.0518689	0.109	0.166	1	2	PCMTD2
PLK1	4.9005e-05	0.128721	0.06	0.034	1	2	PLK1
CDH11	4.90324e-05	0.0595878	0.134	0.092	1	2	CDH11
LUZP2	4.90394e-05	-0.121303	0.018	0.047	1	2	LUZP2
RPL23AP75	4.95078e-05	-0.112221	0.073	0.118	1	2	RPL23AP75
GIPC1	4.97855e-05	0.140404	0.147	0.105	1	2	GIPC1
CCDC102B	5.00936e-05	-0.0871024	0.05	0.089	1	2	CCDC102B
SLC18B1	5.15423e-05	-0.123897	0.022	0.052	1	2	SLC18B1
MYL12A	5.16792e-05	0.175719	0.264	0.212	1	2	MYL12A
EGR3	5.23076e-05	0.113666	0.088	0.055	1	2	EGR3
GPR12	5.25458e-05	-0.0876896	0.022	0.052	1	2	GPR12
CDK2AP1	5.26258e-05	-0.130333	0.115	0.165	1	2	CDK2AP1
NEUROD1	5.48279e-05	-0.111414	0.01	0.034	1	2	NEUROD1
UQCRHL	5.51024e-05	-0.12333	0.249	0.322	1	2	UQCRHL
MGAT1	5.68456e-05	0.10208	0.116	0.078	1	2	MGAT1
FKBP11	5.72229e-05	-0.0781375	0.015	0.042	1	2	FKBP11
KRBOX1	5.92346e-05	-0.0557066	0.023	0.054	1	2	KRBOX1
FGFRL1	5.95884e-05	0.0628262	0.076	0.046	1	2	FGFRL1
OLFM1	6.18762e-05	-0.434949	0.128	0.178	1	2	OLFM1
AGT	6.22897e-05	-0.203784	0.25	0.313	1	2	AGT
NTRK3	6.25142e-05	-0.120537	0.05	0.089	1	2	NTRK3
DENND2A	6.26845e-05	-0.116416	0.067	0.11	1	2	DENND2A
TNFRSF1A	6.27021e-05	0.0814553	0.174	0.126	1	2	TNFRSF1A
CDK5R1	6.6247e-05	-0.124996	0.035	0.069	1	2	CDK5R1
SEC61G	6.66034e-05	-0.12594	0.776	0.788	1	2	SEC61G
MT-TV	6.72228e-05	0.072028	0.07	0.042	1	2	MT-TV
MAP1B	6.84511e-05	0.143259	0.497	0.456	1	2	MAP1B
SDC3	6.8528e-05	-0.216862	0.232	0.293	1	2	SDC3
PXMP2	6.89357e-05	-0.105639	0.08	0.126	1	2	PXMP2
TCF12	6.92747e-05	-0.173868	0.199	0.261	1	2	TCF12
PPIAP70	7.03792e-05	-0.0946453	0.01	0.033	1	2	PPIAP70
MT1P3	7.04999e-05	0.136482	0.095	0.062	1	2	MT1P3
MSN	7.1299e-05	0.164478	0.209	0.161	1	2	MSN
ID3	7.19705e-05	0.222014	0.236	0.183	1	2	ID3
SLC4A4	7.19708e-05	-0.133356	0.162	0.22	1	2	SLC4A4
COQ4	7.28566e-05	-0.132716	0.106	0.156	1	2	COQ4
GADD45B	7.35113e-05	0.171321	0.256	0.201	1	2	GADD45B
CD274	7.41538e-05	0.0525625	0.035	0.017	1	2	CD274
RBMX2	7.4654e-05	-0.072469	0.081	0.127	1	2	RBMX2
TMEM178A	7.80287e-05	-0.0816129	0.056	0.098	1	2	TMEM178A
PDE4D	8.04279e-05	0.0581527	0.11	0.074	1	2	PDE4D
MIF4GD	8.11638e-05	-0.129569	0.044	0.081	1	2	MIF4GD
GNAS	8.15709e-05	-0.105281	0.697	0.734	1	2	GNAS
CTNND2	8.54846e-05	-0.17617	0.194	0.252	1	2	CTNND2
BLCAP	8.67639e-05	-0.112454	0.206	0.272	1	2	BLCAP
CPNE2	8.87821e-05	-0.150928	0.156	0.216	1	2	CPNE2
C1QBP	8.89349e-05	-0.161304	0.308	0.38	1	2	C1QBP
CDK6	9.0295e-05	-0.190915	0.139	0.19	1	2	CDK6
RELT	9.02955e-05	0.050425	0.048	0.026	1	2	RELT
YBX3	9.29601e-05	0.127362	0.168	0.124	1	2	YBX3
GAPDHP35	0.000100121	-0.141335	0.182	0.245	1	2	GAPDHP35
RAB34	0.00010141	-0.122854	0.07	0.112	1	2	RAB34
ZFPM1	0.00010594	0.0531364	0.053	0.03	1	2	ZFPM1
NDUFA5	0.000106014	-0.119954	0.317	0.383	1	2	NDUFA5
PRKACB	0.000106047	-0.14735	0.085	0.13	1	2	PRKACB
IGFBP7	0.000106758	0.218502	0.313	0.264	1	2	IGFBP7
SERPINH1	0.000107764	0.13969	0.152	0.109	1	2	SERPINH1
FCF1	0.000109859	0.0740298	0.103	0.069	1	2	FCF1
PON2	0.000112065	-0.167488	0.42	0.475	1	2	PON2
TUBA4A	0.000117205	0.146554	0.077	0.048	1	2	TUBA4A
TFPI	0.000117474	-0.145682	0.149	0.201	1	2	TFPI
HYDIN	0.000119972	-0.119663	0.009	0.031	1	2	HYDIN
VAMP5	0.000120032	0.1034	0.183	0.137	1	2	VAMP5
MKNK2	0.000120847	0.150178	0.142	0.102	1	2	MKNK2
NCMAP	0.000124433	-0.0586685	0.014	0.039	1	2	NCMAP
CASKIN2	0.000125185	-0.129678	0.04	0.074	1	2	CASKIN2
THAP5	0.000125297	-0.133693	0.105	0.152	1	2	THAP5
FAM180A	0.000125487	-0.176041	0.004	0.024	1	2	FAM180A
ALDH7A1	0.000125894	-0.142554	0.163	0.22	1	2	ALDH7A1
CHCHD2P9	0.000126143	-0.17278	0.354	0.417	1	2	CHCHD2P9
MMP16	0.000131304	-0.0847817	0.06	0.1	1	2	MMP16
RPS27P21	0.00013199	0.0538411	0.096	0.063	1	2	RPS27P21
NRXN1	0.000134005	-0.116919	0.109	0.158	1	2	NRXN1
KCNIP1	0.000140724	-0.0800589	0.057	0.098	1	2	KCNIP1
BEST3	0.000146352	-0.125687	0.024	0.052	1	2	BEST3
ADCYAP1R1	0.000147987	-0.0763463	0.101	0.15	1	2	ADCYAP1R1
SPRYD3	0.000153268	0.12775	0.075	0.047	1	2	SPRYD3
C22orf39	0.000154281	-0.0708015	0.103	0.151	1	2	C22orf39
EHD1	0.000154509	0.0607389	0.095	0.063	1	2	EHD1
ELOVL1	0.000156499	0.0738644	0.103	0.069	1	2	ELOVL1
SPATA6	0.000159099	-0.058296	0.075	0.118	1	2	SPATA6
FEM1C	0.000161046	0.107775	0.144	0.104	1	2	FEM1C
TAF13	0.000167587	0.0847173	0.175	0.131	1	2	TAF13
PTPRN2	0.000168798	-0.0691537	0.11	0.163	1	2	PTPRN2
SOX10	0.000174873	0.23778	0.104	0.072	1	2	SOX10
NCALD	0.000185404	-0.100784	0.065	0.104	1	2	NCALD
RPL34P34	0.000187626	0.0531613	0.098	0.065	1	2	RPL34P34
IFI27	0.000187696	0.0868855	0.055	0.032	1	2	IFI27
C14orf28	0.000191297	0.0539408	0.021	0.008	1	2	C14orf28
PRKAG2-AS1	0.000200166	-0.0558609	0.019	0.046	1	2	PRKAG2-AS1
RSRP1	0.000203419	0.0837537	0.126	0.089	1	2	RSRP1
LIX1	0.000205452	-0.126714	0.014	0.038	1	2	LIX1
EPN2	0.000207649	-0.0704922	0.155	0.212	1	2	EPN2
SLC43A2	0.000216803	0.065652	0.074	0.046	1	2	SLC43A2
NLK	0.000217203	-0.11846	0.067	0.106	1	2	NLK
LINC01447	0.000222564	0.0561351	0.014	0.005	1	2	LINC01447
UQCRFS1	0.00022604	-0.154725	0.289	0.349	1	2	UQCRFS1
PPIAP55	0.000232931	-0.0737594	0.028	0.057	1	2	PPIAP55
MID1IP1	0.000238996	0.14163	0.139	0.1	1	2	MID1IP1
GNG3	0.00024072	-0.0872847	0.006	0.026	1	2	GNG3
LAMTOR2	0.000248519	-0.118242	0.214	0.274	1	2	LAMTOR2
RRAD	0.000249611	0.0635828	0.026	0.012	1	2	RRAD
IRF2BPL	0.000250114	0.0737222	0.157	0.116	1	2	IRF2BPL
SLITRK3	0.000257546	-0.115488	0.044	0.077	1	2	SLITRK3
TRIB2	0.000260454	-0.18364	0.163	0.216	1	2	TRIB2
AGAP2-AS1	0.000261277	0.111433	0.084	0.055	1	2	AGAP2-AS1
PLK2	0.000261764	0.0968097	0.071	0.045	1	2	PLK2
GAREM2	0.000262977	-0.09025	0.031	0.061	1	2	GAREM2
DSEL	0.000263524	-0.176665	0.158	0.211	1	2	DSEL
NCOA3	0.000266943	-0.0696518	0.035	0.065	1	2	NCOA3
TMEM161B-AS1	0.000269241	-0.200429	0.149	0.2	1	2	TMEM161B-AS1
RPL13AP7	0.000283871	0.0937226	0.242	0.193	1	2	RPL13AP7
RPS10P2	0.00030181	0.07041	0.087	0.057	1	2	RPS10P2
KCNF1	0.000302703	-0.0646083	0.009	0.029	1	2	KCNF1
MT-TL1	0.000302758	0.0609633	0.054	0.032	1	2	MT-TL1
RPS2P32	0.000302934	-0.130878	0.074	0.112	1	2	RPS2P32
GAD1	0.000304124	-0.102759	0.015	0.039	1	2	GAD1
APLP1	0.000307464	0.196254	0.274	0.228	1	2	APLP1
ACTN2	0.000312193	0.0744582	0.064	0.039	1	2	ACTN2
ENO2	0.000312599	0.36332	0.386	0.337	1	2	ENO2
LYPLA1	0.000312871	-0.121843	0.108	0.152	1	2	LYPLA1
APOE	0.000313218	0.243061	0.447	0.409	1	2	APOE
EFNB2	0.000313459	0.0788486	0.124	0.089	1	2	EFNB2
GPM6A	0.0003144	-0.10387	0.555	0.62	1	2	GPM6A
DDAH1	0.000319904	-0.162117	0.128	0.173	1	2	DDAH1
NDRG1	0.000320461	0.0686916	0.145	0.106	1	2	NDRG1
PPP1R3E	0.000322796	0.0651091	0.039	0.021	1	2	PPP1R3E
GAL	0.000322929	0.0645256	0.021	0.009	1	2	GAL
LMO1	0.000326944	-0.0662158	0.042	0.075	1	2	LMO1
MCUR1	0.000328181	-0.115946	0.077	0.116	1	2	MCUR1
TWSG1	0.000329257	0.108476	0.158	0.118	1	2	TWSG1
ITPKB	0.000329924	0.0910187	0.103	0.07	1	2	ITPKB
KLF6	0.000331132	0.155101	0.246	0.202	1	2	KLF6
INPP1	0.000332376	-0.0757812	0.039	0.07	1	2	INPP1
CHADL	0.000332382	0.128007	0.06	0.036	1	2	CHADL
SRI	0.000333928	-0.141748	0.64	0.666	1	2	SRI
MVB12B	0.000337664	0.193766	0.071	0.046	1	2	MVB12B
PRPSAP1	0.00034512	-0.134576	0.106	0.15	1	2	PRPSAP1
HES6	0.000345638	-0.255854	0.179	0.232	1	2	HES6
TSPAN7	0.000348755	-0.165719	0.273	0.335	1	2	TSPAN7
NUCB2	0.000356708	-0.167752	0.166	0.214	1	2	NUCB2
LRIG1	0.000358815	0.1094	0.231	0.184	1	2	LRIG1
CKLF	0.000362691	-0.112625	0.17	0.222	1	2	CKLF
TRIM52-AS1	0.000379419	-0.100406	0.057	0.093	1	2	TRIM52-AS1
PKP4	0.000381291	0.16837	0.118	0.086	1	2	PKP4
TRIM4	0.000384824	0.0555663	0.09	0.06	1	2	TRIM4
PPP1R14BP3	0.00038651	-0.109096	0.102	0.147	1	2	PPP1R14BP3
TSPAN3	0.0003866	-0.196761	0.45	0.5	1	2	TSPAN3
MOCS2	0.000386651	-0.087037	0.111	0.157	1	2	MOCS2
MAGED1	0.000389565	-0.151846	0.398	0.46	1	2	MAGED1
NFIA	0.000398413	-0.14082	0.315	0.382	1	2	NFIA
SNHG7	0.000405035	0.0663024	0.169	0.127	1	2	SNHG7
HTATSF1	0.000405443	-0.0951914	0.113	0.156	1	2	HTATSF1
FAIM2	0.000406614	-0.0549844	0.075	0.115	1	2	FAIM2
SCHIP1	0.000408287	-0.0617045	0.023	0.048	1	2	SCHIP1
GDPD2	0.000415228	-0.0887631	0.019	0.044	1	2	GDPD2
PMP2	0.000415697	0.0500071	0.281	0.228	1	2	PMP2
TNS3	0.000418922	0.281586	0.116	0.084	1	2	TNS3
RUFY3	0.000419091	-0.129822	0.18	0.231	1	2	RUFY3
DUSP1	0.00042038	0.246644	0.228	0.186	1	2	DUSP1
TFPI2	0.000424817	0.0777234	0.008	0.002	1	2	TFPI2
POU3F2	0.000428514	-0.139955	0.118	0.16	1	2	POU3F2
SPECC1	0.000431421	-0.126797	0.096	0.139	1	2	SPECC1
NAV1	0.000433014	-0.204357	0.093	0.133	1	2	NAV1
C12orf49	0.000436444	0.132111	0.143	0.106	1	2	C12orf49
PLP1	0.000438721	0.544064	0.16	0.126	1	2	PLP1
NR2F2	0.000440985	-0.106201	0.089	0.128	1	2	NR2F2
MYO9B	0.000442579	0.100018	0.13	0.095	1	2	MYO9B
BMP1	0.000446869	0.0702556	0.065	0.041	1	2	BMP1
CYLD	0.000448964	0.0535689	0.085	0.057	1	2	CYLD
ABL2	0.000450566	0.0590214	0.11	0.077	1	2	ABL2
TMEM98	0.000450734	-0.0841959	0.042	0.074	1	2	TMEM98
TRAF3IP2-AS1	0.00045672	-0.0740004	0.05	0.083	1	2	TRAF3IP2-AS1
CHST2	0.000461422	0.0682844	0.075	0.048	1	2	CHST2
BMP2	0.000479264	0.113221	0.066	0.042	1	2	BMP2
SMYD2	0.000482436	-0.188289	0.081	0.118	1	2	SMYD2
MEOX2	0.00048318	-0.0510462	0.043	0.076	1	2	MEOX2
RNPEPL1	0.000489085	0.0801657	0.077	0.05	1	2	RNPEPL1
SFRP1	0.000490172	0.0790291	0.021	0.009	1	2	SFRP1
LRRTM1	0.000495447	0.110138	0.038	0.021	1	2	LRRTM1
CSRP2	0.000496172	0.13304	0.248	0.204	1	2	CSRP2
CLDND2	0.000507138	-0.0509876	0.005	0.023	1	2	CLDND2
APOOL	0.000512543	-0.0616841	0.016	0.039	1	2	APOOL
NIPSNAP3A	0.00052053	0.108408	0.064	0.04	1	2	NIPSNAP3A
C16orf58	0.000522186	0.119363	0.091	0.062	1	2	C16orf58
HDGF	0.000531259	0.142798	0.256	0.212	1	2	HDGF
RAB27A	0.000531758	0.0648304	0.035	0.018	1	2	RAB27A
RNH1	0.000543908	0.176494	0.248	0.206	1	2	RNH1
POLR1E	0.000545693	0.0959806	0.073	0.047	1	2	POLR1E
BHLHE40	0.000546347	0.102314	0.087	0.058	1	2	BHLHE40
MRTFA	0.00054816	0.0569647	0.051	0.03	1	2	MRTFA
ZNF395	0.000566154	0.0580276	0.089	0.06	1	2	ZNF395
ARHGAP22	0.000567471	0.0823711	0.031	0.016	1	2	ARHGAP22
NDUFC1	0.000568681	-0.11073	0.452	0.508	1	2	NDUFC1
GNG7	0.00058221	-0.0770756	0.146	0.198	1	2	GNG7
B4GALNT1	0.000596528	0.239709	0.224	0.181	1	2	B4GALNT1
C7orf61	0.000600374	-0.0720507	0.028	0.055	1	2	C7orf61
MAP4K4	0.000608966	0.144192	0.277	0.23	1	2	MAP4K4
EMP1	0.000620503	0.128613	0.22	0.177	1	2	EMP1
RPS27AP12	0.00062995	0.157075	0.22	0.179	1	2	RPS27AP12
HDHD5	0.000634669	-0.0930218	0.087	0.129	1	2	HDHD5
TXLNGY	0.000647184	0.116275	0.057	0.036	1	2	TXLNGY
HEY1	0.000652684	-0.0819133	0.133	0.179	1	2	HEY1
ANGPTL2	0.000655131	0.188382	0.089	0.062	1	2	ANGPTL2
CCDC28B	0.000659985	-0.0755716	0.1	0.142	1	2	CCDC28B
NPAS2	0.000663519	0.0581454	0.041	0.023	1	2	NPAS2
MMP2	0.00066356	-0.106845	0.065	0.102	1	2	MMP2
PHPT1	0.000664079	-0.130109	0.461	0.527	1	2	PHPT1
CDH4	0.000675615	-0.0725158	0.03	0.057	1	2	CDH4
MCRIP1	0.000680066	-0.110674	0.155	0.205	1	2	MCRIP1
HMGA2	0.000690212	0.0580048	0.071	0.046	1	2	HMGA2
PRKAR1A	0.000702134	-0.133961	0.234	0.287	1	2	PRKAR1A
PDK1	0.000709399	0.0629149	0.08	0.053	1	2	PDK1
NIN	0.00071058	-0.154051	0.068	0.103	1	2	NIN
KIAA0930	0.000713301	0.149143	0.097	0.069	1	2	KIAA0930
PTP4A1	0.000718382	0.202257	0.301	0.262	1	2	PTP4A1
C11orf96	0.000726671	0.19219	0.182	0.145	1	2	C11orf96
UAP1	0.000742531	0.0736366	0.116	0.083	1	2	UAP1
CCT6A	0.000744171	-0.181433	0.723	0.728	1	2	CCT6A
FAM20C	0.00074896	0.0989093	0.18	0.14	1	2	FAM20C
ELOVL2	0.000749431	-0.10373	0.146	0.193	1	2	ELOVL2
SLC12A6	0.000763198	0.0912565	0.064	0.041	1	2	SLC12A6
SOX15	0.00076559	-0.0793401	0.069	0.104	1	2	SOX15
CCN2	0.000769944	0.116981	0.047	0.027	1	2	CCN2
IPO4	0.000771646	0.0748518	0.057	0.035	1	2	IPO4
MGAT5B	0.000773384	-0.0508844	0.004	0.02	1	2	MGAT5B
STMN3	0.000774536	-0.125568	0.165	0.214	1	2	STMN3
LDB2	0.000788293	-0.081983	0.012	0.032	1	2	LDB2
PRRC2A	0.00079916	0.104405	0.216	0.173	1	2	PRRC2A
YBX1	0.000801496	-0.153635	0.627	0.67	1	2	YBX1
GTF3A	0.000804035	-0.180686	0.179	0.227	1	2	GTF3A
CSKMT	0.000804066	-0.110875	0.064	0.098	1	2	CSKMT
NPIPA3	0.000805333	-0.0999409	0.055	0.088	1	2	NPIPA3
CTSD	0.000811767	0.156086	0.328	0.289	1	2	CTSD
EHD2	0.000812998	0.130458	0.089	0.061	1	2	EHD2
SYT17	0.000827873	-0.0621998	0.075	0.112	1	2	SYT17
SNHG25	0.00082912	-0.103302	0.171	0.223	1	2	SNHG25
IQCE	0.000829958	-0.114587	0.061	0.094	1	2	IQCE
ITGB8	0.0008329	-0.284677	0.249	0.295	1	2	ITGB8
MBD4	0.000833378	0.0682532	0.098	0.069	1	2	MBD4
MYL6P3	0.000836717	0.0927034	0.123	0.09	1	2	MYL6P3
MIAT	0.000838922	-0.205689	0.063	0.097	1	2	MIAT
RAB4A	0.000839202	-0.0818046	0.115	0.159	1	2	RAB4A
ERAP1	0.000844804	0.0504419	0.085	0.058	1	2	ERAP1
CRYAB	0.000848938	0.226043	0.56	0.545	1	2	CRYAB
GYS1	0.000853095	0.115172	0.091	0.062	1	2	GYS1
NDRG4	0.000858163	-0.114562	0.123	0.166	1	2	NDRG4
TXNL4A	0.00086124	-0.129703	0.393	0.45	1	2	TXNL4A
AATK	0.000864224	0.168661	0.058	0.037	1	2	AATK
FAM47E	0.000867768	0.0630415	0.026	0.013	1	2	FAM47E
STARD7	0.000872117	-0.136651	0.235	0.287	1	2	STARD7
PPP1CC	0.000876076	-0.121228	0.177	0.227	1	2	PPP1CC
NELL1	0.000878884	-0.106172	0.081	0.121	1	2	NELL1
HMGA1	0.000883234	0.0918712	0.201	0.161	1	2	HMGA1
HBEGF	0.000886649	0.0655875	0.071	0.047	1	2	HBEGF
SUMO2P17	0.000892747	-0.0717686	0.161	0.214	1	2	SUMO2P17
ACSS1	0.000892838	-0.104701	0.027	0.052	1	2	ACSS1
PPM1K	0.00089294	-0.146964	0.062	0.094	1	2	PPM1K
ATF3	0.000904411	0.108759	0.183	0.142	1	2	ATF3
SLC25A5P5	0.000911639	-0.0562276	0.037	0.065	1	2	SLC25A5P5
GPR162	0.00091507	-0.0829673	0.024	0.048	1	2	GPR162
APBA2	0.000922108	-0.126396	0.1	0.139	1	2	APBA2
NRN1	0.000923348	0.125749	0.119	0.086	1	2	NRN1
HSPE1P2	0.000938956	-0.12414	0.3	0.361	1	2	HSPE1P2
ELFN1	0.000949205	-0.0638011	0.003	0.018	1	2	ELFN1
ALDH6A1	0.000952345	-0.124139	0.108	0.148	1	2	ALDH6A1
BCL6	0.000961022	0.188171	0.209	0.164	1	2	BCL6
LMCD1	0.000963972	0.0615167	0.051	0.031	1	2	LMCD1
ZNF184	0.000965449	-0.0789086	0.012	0.031	1	2	ZNF184
MARCH2	0.000967277	0.0930256	0.094	0.066	1	2	MARCH2
EHBP1	0.000969068	0.0594643	0.148	0.112	1	2	EHBP1
EXTL3	0.000977351	-0.0904489	0.078	0.114	1	2	EXTL3
CHCHD2P1	0.00097746	-0.0512719	0.016	0.038	1	2	CHCHD2P1
MGARP	0.000985216	-0.067047	0.029	0.055	1	2	MGARP
MYO1E	0.000998766	0.0790074	0.047	0.028	1	2	MYO1E
SMIM5	0.000999836	0.0579699	0.008	0.002	1	2	SMIM5
PGRMC1	0.00100426	0.141235	0.308	0.262	1	2	PGRMC1
ELAVL1	0.00103706	0.0945204	0.215	0.173	1	2	ELAVL1
MEX3A	0.0010383	-0.0789844	0.058	0.092	1	2	MEX3A
RPS10P14	0.00103836	0.0570077	0.124	0.091	1	2	RPS10P14
IER2	0.00103985	0.189755	0.295	0.249	1	2	IER2
TMEM158	0.00105155	0.146329	0.234	0.194	1	2	TMEM158
RETSAT	0.00106038	0.0729691	0.089	0.061	1	2	RETSAT
CCDC80	0.00106724	-0.151717	0.16	0.204	1	2	CCDC80
PTPRD	0.00106728	-0.0622111	0.042	0.071	1	2	PTPRD
MAP3K1	0.00107402	-0.0886174	0.04	0.068	1	2	MAP3K1
NUDT4	0.00107555	0.0957314	0.267	0.221	1	2	NUDT4
MRPS7	0.0010759	-0.208664	0.198	0.247	1	2	MRPS7
RHOA	0.00107727	0.106879	0.579	0.557	1	2	RHOA
COL6A1	0.00107906	0.229657	0.17	0.136	1	2	COL6A1
RAMP2	0.00108085	-0.082526	0.053	0.084	1	2	RAMP2
GSN	0.00108259	0.131121	0.136	0.102	1	2	GSN
RNF165	0.00108272	-0.0686899	0.018	0.04	1	2	RNF165
OAS3	0.00109542	-0.0812113	0.035	0.061	1	2	OAS3
ZSWIM3	0.00109975	0.073698	0.016	0.007	1	2	ZSWIM3
PTPRG	0.0011189	-0.083916	0.074	0.108	1	2	PTPRG
UQCRC2	0.00113327	-0.105927	0.183	0.234	1	2	UQCRC2
NRIP1	0.00113489	0.065858	0.113	0.082	1	2	NRIP1
SETD9	0.00113689	-0.0669482	0.016	0.037	1	2	SETD9
PORCN	0.00115162	0.0706638	0.052	0.032	1	2	PORCN
NPL	0.00115466	-0.0535341	0.005	0.021	1	2	NPL
AMD1	0.00116251	0.080152	0.199	0.159	1	2	AMD1
SSR3	0.00116792	0.119146	0.364	0.321	1	2	SSR3
GOLM1	0.00117119	-0.111967	0.159	0.206	1	2	GOLM1
SELENOS	0.00117225	-0.125895	0.122	0.164	1	2	SELENOS
GSG1L	0.00117249	-0.0768244	0.01	0.027	1	2	GSG1L
GABARAPL2	0.00117912	-0.115435	0.53	0.572	1	2	GABARAPL2
LDLR	0.00118027	0.0885864	0.066	0.043	1	2	LDLR
IFITM3	0.0011917	0.0987551	0.474	0.423	1	2	IFITM3
GLUL	0.00120534	0.298396	0.38	0.355	1	2	GLUL
CTSB	0.00121909	0.217804	0.342	0.312	1	2	CTSB
TBRG1	0.00122031	0.134622	0.149	0.115	1	2	TBRG1
TMTC4	0.00122387	0.112893	0.071	0.048	1	2	TMTC4
R3HDM1	0.00123828	-0.0680924	0.044	0.073	1	2	R3HDM1
NETO2	0.00124534	-0.124056	0.097	0.135	1	2	NETO2
KLRC2	0.00126376	-0.138998	0.053	0.084	1	2	KLRC2
NID1	0.00128009	-0.122406	0.017	0.038	1	2	NID1
GMFB	0.00131287	0.100668	0.135	0.102	1	2	GMFB
TNRC6C	0.00131482	-0.0698535	0.096	0.135	1	2	TNRC6C
MDFI	0.0013167	0.125228	0.06	0.038	1	2	MDFI
ZNF584	0.00132693	0.0750117	0.045	0.027	1	2	ZNF584
IGSF3	0.00133092	-0.0713758	0.045	0.074	1	2	IGSF3
TEK	0.00134669	-0.0591863	0.003	0.017	1	2	TEK
UST	0.00135155	0.0577446	0.071	0.048	1	2	UST
H2AFZP2	0.00137042	-0.0900052	0.037	0.063	1	2	H2AFZP2
CHRD	0.00138127	-0.0595891	0.008	0.024	1	2	CHRD
AAGAB	0.00139908	0.12379	0.08	0.055	1	2	AAGAB
NRCAM	0.00140169	0.153784	0.475	0.449	1	2	NRCAM
ABHD2	0.00140333	-0.114339	0.152	0.196	1	2	ABHD2
ASCL1	0.00140561	-0.0778893	0.082	0.12	1	2	ASCL1
TBC1D13	0.00140604	0.0778429	0.05	0.031	1	2	TBC1D13
FAM217B	0.00140639	-0.0714117	0.044	0.073	1	2	FAM217B
COA7	0.00141441	-0.0742004	0.025	0.048	1	2	COA7
UTP3	0.00143509	0.0663752	0.085	0.059	1	2	UTP3
SRGAP3	0.00144894	-0.103815	0.054	0.084	1	2	SRGAP3
RCN2	0.00145051	-0.150481	0.234	0.285	1	2	RCN2
KCNJ10	0.00145416	-0.0703688	0.049	0.078	1	2	KCNJ10
WDR61	0.00147186	-0.0812435	0.126	0.167	1	2	WDR61
BCYRN1	0.00147479	0.261824	0.206	0.17	1	2	BCYRN1
MPC1	0.00150767	-0.0642157	0.222	0.282	1	2	MPC1
MSI2	0.00150846	-0.159176	0.224	0.272	1	2	MSI2
WWTR1	0.00151645	0.0663598	0.158	0.121	1	2	WWTR1
SLC15A2	0.00152529	-0.091109	0.015	0.034	1	2	SLC15A2
ARL2	0.00154654	0.0896626	0.22	0.179	1	2	ARL2
GPX7	0.00154708	-0.0734446	0.042	0.07	1	2	GPX7
TATDN1	0.00155337	0.0838743	0.127	0.094	1	2	TATDN1
CHN1	0.00155514	-0.133155	0.089	0.124	1	2	CHN1
TMEM97	0.00155602	-0.0920522	0.074	0.109	1	2	TMEM97
KDM4C	0.00156103	0.0835563	0.051	0.032	1	2	KDM4C
MTURN	0.00156708	0.140543	0.09	0.063	1	2	MTURN
GNAZ	0.00157075	-0.0653886	0.064	0.096	1	2	GNAZ
NES	0.00157456	-0.168111	0.33	0.38	1	2	NES
SUB1	0.0015748	-0.0956384	0.57	0.609	1	2	SUB1
CYC1	0.0015748	-0.106313	0.305	0.369	1	2	CYC1
IFI44L	0.00158843	-0.12662	0.052	0.081	1	2	IFI44L
DIXDC1	0.00159544	0.0654215	0.061	0.039	1	2	DIXDC1
BCKDK	0.00160119	0.157705	0.137	0.105	1	2	BCKDK
EPAS1	0.0016086	0.265338	0.165	0.13	1	2	EPAS1
CERS2	0.00161346	0.0815959	0.134	0.101	1	2	CERS2
REXO2	0.00162295	0.090447	0.175	0.139	1	2	REXO2
TXNP5	0.00165061	0.0563847	0.093	0.065	1	2	TXNP5
PHYHIPL	0.00166917	-0.0914425	0.116	0.157	1	2	PHYHIPL
NDUFC2	0.00167048	-0.103622	0.506	0.562	1	2	NDUFC2
PRKCSH	0.00167059	0.0689033	0.231	0.188	1	2	PRKCSH
PSPH	0.00167834	-0.120189	0.379	0.431	1	2	PSPH
COMMD5	0.00168994	0.0641528	0.116	0.085	1	2	COMMD5
FAM216A	0.00169427	-0.122699	0.061	0.091	1	2	FAM216A
BMP2K	0.00169739	0.0531771	0.055	0.035	1	2	BMP2K
IRAK1	0.00170087	0.128817	0.127	0.096	1	2	IRAK1
BAG3	0.0017123	0.132962	0.095	0.068	1	2	BAG3
PTGFRN	0.00171925	-0.158741	0.097	0.132	1	2	PTGFRN
PCCA	0.00172044	-0.0726541	0.019	0.04	1	2	PCCA
FAM131C	0.00172523	0.0617621	0.017	0.008	1	2	FAM131C
INSYN2	0.00173797	-0.0661791	0.006	0.022	1	2	INSYN2
CAMK2G	0.00177975	-0.0751845	0.031	0.056	1	2	CAMK2G
BTBD17	0.00179283	-0.0667691	0.013	0.031	1	2	BTBD17
TKT	0.00179852	0.0579009	0.229	0.187	1	2	TKT
HSPE1P16	0.00181432	0.0815161	0.036	0.02	1	2	HSPE1P16
IRS1	0.00181783	0.0847415	0.032	0.018	1	2	IRS1
FAM84B	0.00183197	-0.0587823	0.061	0.092	1	2	FAM84B
RANGAP1	0.00185168	0.107931	0.091	0.065	1	2	RANGAP1
THSD7A	0.00188314	-0.0674753	0.078	0.113	1	2	THSD7A
BORCS8	0.00188519	-0.103675	0.052	0.081	1	2	BORCS8
PLCE1	0.00189331	-0.142646	0.035	0.059	1	2	PLCE1
ZNF24	0.00191061	-0.108221	0.132	0.173	1	2	ZNF24
LGR6	0.0019182	-0.0936921	0.014	0.033	1	2	LGR6
SDHD	0.00192323	-0.151818	0.167	0.207	1	2	SDHD
SNRNP25	0.00193275	-0.0649515	0.156	0.202	1	2	SNRNP25
ACTA2	0.00193454	0.0539463	0.061	0.039	1	2	ACTA2
ATP13A4	0.00195582	-0.0689623	0.031	0.056	1	2	ATP13A4
GBP3	0.00197093	0.0805217	0.044	0.027	1	2	GBP3
TOGARAM1	0.00197206	0.0796719	0.05	0.031	1	2	TOGARAM1
EEF2	0.00198353	0.0842435	0.596	0.566	1	2	EEF2
DNAH9	0.00199608	-0.051727	0.01	0.026	1	2	DNAH9
SLC29A4	0.00203249	-0.0565584	0.073	0.106	1	2	SLC29A4
SEL1L3	0.00203814	0.0652234	0.066	0.044	1	2	SEL1L3
ID1	0.0020433	0.0891013	0.08	0.055	1	2	ID1
WTAP	0.00204688	0.153509	0.307	0.271	1	2	WTAP
DLGAP5	0.00207407	-0.0829496	0.015	0.034	1	2	DLGAP5
KIFC1	0.00208208	0.124888	0.084	0.06	1	2	KIFC1
PLK3	0.00208698	0.0907773	0.065	0.043	1	2	PLK3
TECPR1	0.00210755	-0.140145	0.058	0.087	1	2	TECPR1
CTSC	0.00211724	0.0540927	0.085	0.06	1	2	CTSC
ZNF362	0.00212667	-0.0793751	0.067	0.099	1	2	ZNF362
COLGALT2	0.00216182	-0.0728974	0.074	0.107	1	2	COLGALT2
PIGF	0.00217363	-0.107262	0.093	0.128	1	2	PIGF
MARK1	0.00221258	-0.0789504	0.045	0.073	1	2	MARK1
ABI2	0.0022326	-0.0987164	0.212	0.26	1	2	ABI2
ENO1	0.0022567	0.16893	0.617	0.603	1	2	ENO1
AASS	0.00228244	-0.157367	0.071	0.102	1	2	AASS
ARPC4	0.00228378	0.115711	0.321	0.282	1	2	ARPC4
ZNF358	0.0022873	0.0555799	0.144	0.11	1	2	ZNF358
NPIPB15	0.00229339	-0.0648373	0.011	0.028	1	2	NPIPB15
MFSD2A	0.00231892	0.0553822	0.083	0.058	1	2	MFSD2A
UBA6	0.00233027	0.0516702	0.118	0.088	1	2	UBA6
MAFB	0.0023446	-0.173855	0.064	0.094	1	2	MAFB
ABLIM3	0.00235317	0.0741885	0.032	0.018	1	2	ABLIM3
SUMO2	0.00235364	-0.0946947	0.581	0.631	1	2	SUMO2
KLRC1	0.0023801	-0.0872248	0.038	0.063	1	2	KLRC1
MAP2	0.00238653	-0.0932424	0.384	0.449	1	2	MAP2
RANGRF	0.00238733	-0.0672577	0.08	0.113	1	2	RANGRF
CALM1P1	0.00238892	-0.086125	0.079	0.113	1	2	CALM1P1
SOBP	0.00239145	-0.0828648	0.065	0.095	1	2	SOBP
RIT2	0.00239479	-0.0758894	0.035	0.059	1	2	RIT2
GRAMD1A	0.00239908	0.111069	0.126	0.096	1	2	GRAMD1A
PET117	0.00244234	-0.0624488	0.051	0.079	1	2	PET117
TAGLN3	0.00245123	-0.0816483	0.04	0.066	1	2	TAGLN3
SFT2D1	0.00245904	-0.110685	0.155	0.195	1	2	SFT2D1
TAGLN2	0.00247763	0.132831	0.316	0.28	1	2	TAGLN2
TIMM21	0.00248598	-0.133217	0.095	0.129	1	2	TIMM21
MHENCR	0.00252178	-0.0649567	0.008	0.023	1	2	MHENCR
RNF187	0.00254551	-0.110235	0.262	0.31	1	2	RNF187
RGS4	0.00254623	0.0571125	0.016	0.007	1	2	RGS4
ANP32B	0.00256986	0.110458	0.272	0.231	1	2	ANP32B
SF3A2	0.00257689	0.0508709	0.107	0.079	1	2	SF3A2
GLMP	0.00261522	-0.14047	0.036	0.059	1	2	GLMP
COX5AP2	0.00262347	-0.0721103	0.048	0.075	1	2	COX5AP2
KLF15	0.00262606	-0.0739741	0.056	0.084	1	2	KLF15
SPIRE1	0.00266012	-0.0871329	0.07	0.101	1	2	SPIRE1
PDE8B	0.00272706	-0.0694248	0.029	0.052	1	2	PDE8B
KLF13	0.00273012	0.0562939	0.102	0.074	1	2	KLF13
NALCN	0.0027548	-0.051232	0.011	0.027	1	2	NALCN
MPZL1	0.00275674	0.0928216	0.149	0.117	1	2	MPZL1
GOLGA7	0.00277629	0.139888	0.208	0.172	1	2	GOLGA7
TCEAL8	0.00278981	-0.0949096	0.119	0.158	1	2	TCEAL8
TMOD1	0.00282882	-0.110807	0.085	0.118	1	2	TMOD1
PCYOX1	0.00284146	-0.107579	0.062	0.091	1	2	PCYOX1
BBOX1	0.00286397	-0.0928337	0.06	0.089	1	2	BBOX1
PDP1	0.00286545	0.0675188	0.076	0.053	1	2	PDP1
KDSR	0.00286932	0.101095	0.189	0.153	1	2	KDSR
RFTN2	0.00288523	-0.100525	0.065	0.095	1	2	RFTN2
VPS28	0.0029224	-0.0668558	0.256	0.31	1	2	VPS28
TPPP3	0.00292955	-0.14336	0.065	0.094	1	2	TPPP3
TLE2	0.00294503	-0.0816253	0.041	0.066	1	2	TLE2
OSBPL6	0.00294987	-0.102197	0.062	0.091	1	2	OSBPL6
ZNF711	0.00296296	-0.08381	0.06	0.089	1	2	ZNF711
KCNQ1OT1	0.00296461	0.152006	0.108	0.08	1	2	KCNQ1OT1
TRIM69	0.00298788	-0.0549524	0.066	0.096	1	2	TRIM69
S100B	0.00298878	-0.101067	0.421	0.482	1	2	S100B
SHC4	0.00301597	-0.074344	0.023	0.043	1	2	SHC4
INKA2	0.00302018	-0.0595949	0.028	0.05	1	2	INKA2
DAAM1	0.00304214	0.0975603	0.162	0.128	1	2	DAAM1
SLC25A3	0.00305587	-0.159134	0.427	0.48	1	2	SLC25A3
2011-09-01	0.00306202	-0.0793437	0.141	0.179	1	2	2011-09-01
CCND1	0.00308558	-0.213856	0.048	0.073	1	2	CCND1
RNF112	0.00310489	-0.0899389	0.032	0.055	1	2	RNF112
JOSD2	0.00311789	0.0772156	0.083	0.059	1	2	JOSD2
SDC1	0.00312712	0.0613168	0.047	0.029	1	2	SDC1
SCGN	0.00313798	0.0950033	0.011	0.004	1	2	SCGN
ATG13	0.00320177	0.130839	0.094	0.069	1	2	ATG13
FKBP1C	0.00320272	-0.108819	0.156	0.199	1	2	FKBP1C
COX5A	0.00321737	-0.0917076	0.403	0.457	1	2	COX5A
DPYSL3	0.00323917	0.120646	0.39	0.346	1	2	DPYSL3
TM2D3	0.00325258	-0.10971	0.139	0.177	1	2	TM2D3
NOL11	0.00325852	-0.0844456	0.042	0.067	1	2	NOL11
COL1A1	0.00326307	0.106229	0.017	0.008	1	2	COL1A1
DTD1	0.00327033	-0.0940712	0.203	0.251	1	2	DTD1
POLR3F	0.00328843	-0.0868667	0.085	0.119	1	2	POLR3F
PNMA2	0.00332076	-0.138322	0.137	0.173	1	2	PNMA2
FHL1	0.00332831	-0.165282	0.281	0.328	1	2	FHL1
FNBP1L	0.00333919	-0.0833012	0.078	0.11	1	2	FNBP1L
NDUFS3	0.00334153	-0.101673	0.293	0.344	1	2	NDUFS3
VXN	0.00334613	-0.0777534	0.079	0.113	1	2	VXN
PPIAP9	0.0034167	-0.0628927	0.039	0.063	1	2	PPIAP9
KLHL7	0.00343325	-0.160418	0.123	0.159	1	2	KLHL7
ANO6	0.00344477	0.06327	0.105	0.078	1	2	ANO6
MAGI1	0.00345129	-0.0651744	0.078	0.11	1	2	MAGI1
RHEB	0.00346824	-0.12373	0.485	0.531	1	2	RHEB
PEX14	0.00347863	0.0777898	0.058	0.039	1	2	PEX14
EPS15	0.00347928	-0.0519911	0.085	0.118	1	2	EPS15
ARHGAP23	0.00348458	-0.113159	0.054	0.08	1	2	ARHGAP23
SDHA	0.00348775	-0.129757	0.134	0.172	1	2	SDHA
VOPP1	0.00350162	-0.0664972	0.462	0.496	1	2	VOPP1
ACAN	0.00350462	0.0982537	0.015	0.007	1	2	ACAN
CHMP1B	0.00353012	0.0703282	0.148	0.116	1	2	CHMP1B
POLR2F	0.00354013	-0.103879	0.042	0.066	1	2	POLR2F
ZNF595	0.00354408	-0.0573174	0.015	0.033	1	2	ZNF595
MIF-AS1	0.00357438	0.0560995	0.079	0.056	1	2	MIF-AS1
RPS29P9	0.00359458	0.0501804	0.026	0.014	1	2	RPS29P9
ZNF131	0.00360073	-0.0847088	0.061	0.089	1	2	ZNF131
SPATS2	0.00364572	-0.053683	0.067	0.097	1	2	SPATS2
KIF2C	0.00366094	0.0734399	0.163	0.129	1	2	KIF2C
PTBP1	0.00367897	0.0984831	0.24	0.202	1	2	PTBP1
PLXNA3	0.00371777	0.0714219	0.093	0.068	1	2	PLXNA3
RPS6	0.00372287	0.0692666	0.787	0.75	1	2	RPS6
APPBP2	0.00373558	-0.120078	0.074	0.103	1	2	APPBP2
PUS1	0.00374891	0.102829	0.065	0.044	1	2	PUS1
FGFR2	0.00376125	-0.067503	0.016	0.034	1	2	FGFR2
VPS36	0.00377637	-0.080913	0.066	0.095	1	2	VPS36
BMPER	0.003785	0.098883	0.054	0.036	1	2	BMPER
ZBTB4	0.00378911	-0.117336	0.111	0.145	1	2	ZBTB4
IGSF8	0.00380987	-0.0799661	0.049	0.074	1	2	IGSF8
SURF4	0.00383117	0.0913472	0.166	0.132	1	2	SURF4
TSPAN18	0.00385167	-0.0501361	0.013	0.03	1	2	TSPAN18
SHB	0.00386388	0.0646066	0.035	0.02	1	2	SHB
CDH13	0.0038663	-0.0535562	0.026	0.047	1	2	CDH13
ZNF213	0.00387193	0.0620666	0.041	0.025	1	2	ZNF213
ARFGAP3	0.00390598	-0.151693	0.118	0.153	1	2	ARFGAP3
WDR47	0.00391257	-0.0590987	0.047	0.073	1	2	WDR47
UQCRH	0.00393601	-0.113986	0.592	0.623	1	2	UQCRH
MT-CO1	0.00395828	-0.19526	0.307	0.351	1	2	MT-CO1
PIM3	0.00397697	0.112777	0.137	0.107	1	2	PIM3
POLE4	0.00399696	0.116957	0.135	0.105	1	2	POLE4
RPL34	0.00408458	0.0529527	0.883	0.852	1	2	RPL34
ARPC5	0.00410766	0.0665836	0.292	0.254	1	2	ARPC5
CDKN2C	0.00412327	-0.0919271	0.154	0.196	1	2	CDKN2C
GDPD1	0.00414198	-0.0607578	0.011	0.026	1	2	GDPD1
MBD1	0.0041568	-0.106381	0.062	0.089	1	2	MBD1
CZIB	0.00422278	-0.0899004	0.111	0.147	1	2	CZIB
TBL2	0.00422694	0.132783	0.103	0.077	1	2	TBL2
PLCD1	0.00423242	0.139392	0.08	0.057	1	2	PLCD1
INPP4A	0.00425139	0.0602432	0.085	0.061	1	2	INPP4A
GNAI2	0.00427102	0.09334	0.319	0.284	1	2	GNAI2
TRIM37	0.00427561	-0.0782178	0.068	0.097	1	2	TRIM37
FAR2P2	0.00431316	-0.0693528	0.019	0.038	1	2	FAR2P2
BCAR1	0.00431907	0.0501245	0.105	0.078	1	2	BCAR1
MRPS17	0.00433547	-0.109877	0.36	0.407	1	2	MRPS17
PPIAP7	0.00433611	-0.0643101	0.01	0.024	1	2	PPIAP7
KLF9	0.0043522	-0.124217	0.101	0.132	1	2	KLF9
WWC1	0.00436239	0.0562921	0.051	0.033	1	2	WWC1
FABP3	0.00437685	-0.0597566	0.008	0.021	1	2	FABP3
ZNF469	0.00438537	0.0984679	0.027	0.015	1	2	ZNF469
MRPS26	0.00439141	-0.0942702	0.238	0.288	1	2	MRPS26
MFSD11	0.00440569	-0.0876728	0.043	0.067	1	2	MFSD11
PPIB	0.00441411	-0.0954464	0.588	0.621	1	2	PPIB
MED13	0.00442236	-0.096005	0.096	0.129	1	2	MED13
NDUFA4	0.00444528	-0.0723911	0.947	0.913	1	2	NDUFA4
CAMK1D	0.00445083	-0.0983238	0.023	0.042	1	2	CAMK1D
THRA	0.00449412	-0.0724733	0.149	0.191	1	2	THRA
PXK	0.00452939	0.0676146	0.082	0.059	1	2	PXK
XIST	0.00452964	0.248462	0.082	0.059	1	2	XIST
TMEM242	0.00454367	0.0613076	0.115	0.087	1	2	TMEM242
NAP1L5	0.00455169	-0.0672182	0.035	0.057	1	2	NAP1L5
C1orf21	0.00455787	-0.0554523	0.124	0.161	1	2	C1orf21
NKIRAS2	0.00457556	-0.134573	0.063	0.09	1	2	NKIRAS2
WDR74	0.00457992	0.129493	0.119	0.092	1	2	WDR74
IFITM1	0.00459508	-0.108219	0.029	0.016	1	2	IFITM1
FLII	0.00459818	0.0817197	0.146	0.114	1	2	FLII
CSMD3	0.00464729	-0.0657259	0.006	0.02	1	2	CSMD3
MARCH9	0.00465031	0.124375	0.214	0.179	1	2	MARCH9
PTPN12	0.00465691	0.0603049	0.181	0.145	1	2	PTPN12
TMEM41B	0.00468824	-0.065084	0.092	0.124	1	2	TMEM41B
MRFAP1L1	0.00468832	-0.078102	0.18	0.223	1	2	MRFAP1L1
HSPA6	0.00469005	0.235677	0.063	0.043	1	2	HSPA6
BSG	0.00469143	0.226085	0.335	0.306	1	2	BSG
ATP6V0B	0.00472713	-0.0936473	0.398	0.453	1	2	ATP6V0B
AKAP7	0.00476815	-0.0851405	0.042	0.066	1	2	AKAP7
LONP1	0.0047885	0.0544515	0.162	0.129	1	2	LONP1
SAP30BP	0.00479844	-0.0953917	0.153	0.191	1	2	SAP30BP
CRIP2	0.0048004	-0.0992012	0.281	0.331	1	2	CRIP2
PPIAP66	0.0048033	-0.0706114	0.062	0.089	1	2	PPIAP66
RBMX2P5	0.00481804	-0.0547571	0.012	0.027	1	2	RBMX2P5
CPNE5	0.00485009	-0.057062	0.026	0.046	1	2	CPNE5
STX4	0.00485768	0.114672	0.127	0.097	1	2	STX4
FTH1P23	0.00486491	0.15651	0.182	0.152	1	2	FTH1P23
ATPAF1	0.00487287	-0.0700369	0.123	0.16	1	2	ATPAF1
RPL23A	0.00487593	-0.0963963	0.819	0.818	1	2	RPL23A
MRPS21	0.00488086	-0.100169	0.431	0.481	1	2	MRPS21
YAF2	0.00489485	-0.110197	0.12	0.155	1	2	YAF2
SLC7A5	0.00494732	0.128896	0.096	0.072	1	2	SLC7A5
SH3KBP1	0.00496589	-0.099017	0.065	0.093	1	2	SH3KBP1
PLEC	0.00497159	0.109724	0.13	0.1	1	2	PLEC
SCG2	0.00501077	0.125213	0.135	0.106	1	2	SCG2
ZNF629	0.00501448	-0.0631604	0.035	0.057	1	2	ZNF629
TAX1BP3	0.00501805	0.0922967	0.139	0.108	1	2	TAX1BP3
TMEM109	0.00502417	0.0624482	0.068	0.047	1	2	TMEM109
TOB1	0.00502588	-0.0963376	0.108	0.14	1	2	TOB1
PGK1	0.00502636	0.254823	0.487	0.465	1	2	PGK1
BCL7C	0.00503933	-0.122406	0.172	0.209	1	2	BCL7C
RASGEF1B	0.00504253	0.0667	0.039	0.024	1	2	RASGEF1B
IDI1	0.00506523	-0.0849651	0.069	0.098	1	2	IDI1
AHSA1	0.00507191	0.0812168	0.247	0.209	1	2	AHSA1
DEDD2	0.005083	0.0703578	0.074	0.052	1	2	DEDD2
PSMA6	0.00509247	0.122123	0.085	0.063	1	2	PSMA6
KLHL4	0.00510477	-0.119003	0.063	0.09	1	2	KLHL4
CDR1	0.00512691	-0.114468	0.002	0.012	1	2	CDR1
RPSAP8	0.00517183	-0.0637311	0.041	0.065	1	2	RPSAP8
NR2C2	0.00518765	-0.0895121	0.052	0.077	1	2	NR2C2
H1F0	0.00519217	0.0685273	0.174	0.14	1	2	H1F0
DECR1	0.00520224	-0.0873861	0.234	0.281	1	2	DECR1
ZHX3	0.00520751	-0.0916001	0.126	0.161	1	2	ZHX3
FAM207A	0.00522651	0.0673677	0.089	0.065	1	2	FAM207A
WWP2	0.00522879	0.0732414	0.055	0.037	1	2	WWP2
EVI2A	0.00524003	-0.0760791	0.006	0.019	1	2	EVI2A
EIF6	0.00524319	-0.113306	0.253	0.298	1	2	EIF6
SLC25A38	0.0052529	0.0641633	0.094	0.07	1	2	SLC25A38
KIZ	0.00528227	-0.0509305	0.048	0.073	1	2	KIZ
AGFG1	0.00531645	0.105254	0.147	0.117	1	2	AGFG1
CACNG8	0.00533752	-0.054637	0.027	0.047	1	2	CACNG8
FNDC5	0.00538528	-0.065826	0.011	0.026	1	2	FNDC5
DMD	0.00539243	-0.0622361	0.054	0.081	1	2	DMD
CCDC88A	0.00539383	-0.10667	0.245	0.289	1	2	CCDC88A
FAM19A1	0.00545621	-0.0557805	0.005	0.018	1	2	FAM19A1
DNAJB4	0.00551539	0.0538101	0.08	0.058	1	2	DNAJB4
GSTM4	0.00556264	-0.0633575	0.082	0.113	1	2	GSTM4
GCAT	0.00557369	-0.0972111	0.056	0.082	1	2	GCAT
APTR	0.00557631	-0.0857557	0.036	0.058	1	2	APTR
RPS8P3	0.00562209	0.109357	0.129	0.101	1	2	RPS8P3
PRTFDC1	0.0056245	-0.0605554	0.056	0.083	1	2	PRTFDC1
HMGCS1	0.00563975	-0.0797405	0.168	0.211	1	2	HMGCS1
DDHD2	0.00564145	0.0875882	0.079	0.057	1	2	DDHD2
SPAG16	0.00571312	-0.100664	0.147	0.184	1	2	SPAG16
SCN2A	0.00572085	-0.0709579	0.021	0.038	1	2	SCN2A
TUBGCP4	0.00572775	-0.0701171	0.045	0.069	1	2	TUBGCP4
POSTN	0.00576978	-0.0606619	0.114	0.149	1	2	POSTN
FNDC3B	0.00577683	0.094854	0.126	0.098	1	2	FNDC3B
LRPAP1	0.00583584	-0.0906737	0.263	0.312	1	2	LRPAP1
ILDR2	0.0058764	-0.0664897	0.064	0.092	1	2	ILDR2
MANEAL	0.00587915	-0.0934145	0.039	0.061	1	2	MANEAL
GAPDHP69	0.0059202	-0.102513	0.134	0.171	1	2	GAPDHP69
C5orf24	0.00598356	-0.132542	0.154	0.19	1	2	C5orf24
XYLT1	0.00607197	-0.059826	0.034	0.055	1	2	XYLT1
FAM49A	0.00607516	-0.0586202	0.056	0.082	1	2	FAM49A
LHFPL3	0.00610506	-0.116893	0.018	0.036	1	2	LHFPL3
SERTAD3	0.00613784	0.0717073	0.056	0.038	1	2	SERTAD3
HMGCR	0.00620788	-0.0865039	0.045	0.07	1	2	HMGCR
GRIA3	0.00623515	-0.147151	0.117	0.15	1	2	GRIA3
PSMB5	0.00626813	-0.113819	0.351	0.402	1	2	PSMB5
PALD1	0.00630278	0.0575086	0.022	0.011	1	2	PALD1
BLM	0.00630915	-0.0649341	0.044	0.068	1	2	BLM
ICA1L	0.00631293	-0.050325	0.051	0.076	1	2	ICA1L
SOCS7	0.00631314	-0.0656265	0.031	0.052	1	2	SOCS7
SERTAD1	0.00631871	0.0540146	0.126	0.096	1	2	SERTAD1
CDCA7L	0.00634914	-0.0990441	0.095	0.126	1	2	CDCA7L
PPM1B	0.00636612	-0.130696	0.123	0.157	1	2	PPM1B
ANTXR1	0.00637767	-0.0572431	0.078	0.107	1	2	ANTXR1
SCAMP5	0.00643653	-0.0518019	0.058	0.084	1	2	SCAMP5
SOX2	0.00647675	-0.140185	0.47	0.521	1	2	SOX2
MKKS	0.00650596	-0.11247	0.187	0.225	1	2	MKKS
NIFK	0.00653265	-0.101928	0.096	0.128	1	2	NIFK
DHRS13	0.00653427	-0.121182	0.045	0.068	1	2	DHRS13
COQ9	0.00654617	-0.0854347	0.088	0.118	1	2	COQ9
PCDHGC3	0.00658023	-0.216658	0.045	0.068	1	2	PCDHGC3
TYMS	0.00659194	-0.13776	0.142	0.178	1	2	TYMS
DCXR	0.00663217	-0.0614378	0.241	0.291	1	2	DCXR
RARRES2	0.00667545	-0.063497	0.152	0.118	1	2	RARRES2
AHSA2P	0.00671948	0.087085	0.082	0.06	1	2	AHSA2P
ELFN2	0.00672896	0.101226	0.028	0.016	1	2	ELFN2
RPL22L1	0.00677198	-0.0770699	0.269	0.321	1	2	RPL22L1
GNAI1	0.00678418	0.0708729	0.083	0.061	1	2	GNAI1
PEPD	0.00682169	-0.075667	0.124	0.16	1	2	PEPD
HELLS	0.00683554	-0.0642672	0.039	0.061	1	2	HELLS
RBM39	0.00685727	-0.117936	0.33	0.374	1	2	RBM39
SP100	0.00690276	0.110434	0.144	0.115	1	2	SP100
PPIAP2	0.00691165	-0.0703842	0.1	0.132	1	2	PPIAP2
ZSCAN9	0.00692332	-0.0907761	0.022	0.039	1	2	ZSCAN9
CYB5R1	0.00694681	0.0746951	0.093	0.069	1	2	CYB5R1
COPS2	0.00696252	0.104601	0.108	0.082	1	2	COPS2
ZNF33A	0.00698151	-0.0630293	0.041	0.064	1	2	ZNF33A
EGR2	0.00701557	0.138104	0.095	0.072	1	2	EGR2
TLN1	0.00703122	0.0837766	0.157	0.126	1	2	TLN1
UQCRC1	0.00706155	-0.107766	0.306	0.363	1	2	UQCRC1
ARL3	0.0070762	-0.0757451	0.167	0.206	1	2	ARL3
EXTL2	0.00713366	-0.0903833	0.055	0.08	1	2	EXTL2
LYPD1	0.00717338	-0.0984661	0.144	0.179	1	2	LYPD1
EEF1AKMT3	0.00722265	0.172734	0.051	0.034	1	2	EEF1AKMT3
DYRK2	0.00723147	-0.11376	0.037	0.058	1	2	DYRK2
H2AFV	0.00723353	-0.151459	0.453	0.492	1	2	H2AFV
FANCF	0.00726006	-0.0701054	0.019	0.036	1	2	FANCF
UGP2	0.00728275	-0.143642	0.176	0.21	1	2	UGP2
TIMP2	0.00729462	-0.0861026	0.4	0.451	1	2	TIMP2
OSER1-DT	0.00729585	-0.0546022	0.03	0.051	1	2	OSER1-DT
RCL1	0.00730653	0.0617395	0.048	0.031	1	2	RCL1
FAM219B	0.0073185	-0.0927022	0.043	0.066	1	2	FAM219B
LTBP3	0.00734342	0.0578488	0.21	0.175	1	2	LTBP3
SLC1A5	0.00736048	0.10665	0.052	0.035	1	2	SLC1A5
DCLK1	0.00738126	0.158502	0.159	0.129	1	2	DCLK1
RPL11P3	0.00742102	0.0654138	0.244	0.207	1	2	RPL11P3
RASGRF1	0.00752537	0.0507263	0.013	0.006	1	2	RASGRF1
RTN4	0.00756539	0.0926603	0.495	0.458	1	2	RTN4
POLDIP2	0.00757642	-0.13877	0.137	0.171	1	2	POLDIP2
DYNC1LI2	0.0076274	-0.07285	0.205	0.247	1	2	DYNC1LI2
DHX33	0.00762833	-0.0784933	0.043	0.066	1	2	DHX33
SH3GL1	0.00763048	0.0662978	0.155	0.124	1	2	SH3GL1
PPP1R14A	0.00764364	-0.0606743	0.014	0.029	1	2	PPP1R14A
CMBL	0.00765814	-0.0936372	0.045	0.068	1	2	CMBL
IMPAD1	0.00777057	0.118376	0.179	0.147	1	2	IMPAD1
SLC25A5	0.00780286	-0.119522	0.53	0.557	1	2	SLC25A5
ZNF22	0.00786014	-0.0814081	0.103	0.134	1	2	ZNF22
RPL9P21	0.00786241	0.0647307	0.114	0.087	1	2	RPL9P21
MTFP1	0.0079224	-0.0527866	0.022	0.039	1	2	MTFP1
TBL3	0.00795233	0.0758791	0.063	0.044	1	2	TBL3
CALM1P2	0.00797582	-0.080452	0.032	0.052	1	2	CALM1P2
ITM2A	0.00798538	-0.0801061	0.003	0.013	1	2	ITM2A
NAGLU	0.00801147	0.0786507	0.064	0.045	1	2	NAGLU
UHRF2	0.00807843	0.101486	0.129	0.103	1	2	UHRF2
RP9	0.00808718	-0.0593364	0.16	0.199	1	2	RP9
CDK18	0.00809175	0.0999841	0.041	0.027	1	2	CDK18
ENKUR	0.00812132	-0.0719947	0.028	0.047	1	2	ENKUR
NDUFA8	0.00812899	-0.0862141	0.184	0.223	1	2	NDUFA8
SELENOK	0.00815902	-0.124812	0.341	0.388	1	2	SELENOK
ROCK1	0.00816681	-0.122416	0.102	0.131	1	2	ROCK1
HTRA1	0.00823133	-0.175841	0.232	0.271	1	2	HTRA1
RPL3P3	0.00823594	0.0647896	0.082	0.061	1	2	RPL3P3
RERE	0.00823838	-0.059617	0.077	0.104	1	2	RERE
SLC29A1	0.00825161	0.0930597	0.087	0.065	1	2	SLC29A1
MTHFD2L	0.00827205	-0.0745331	0.064	0.089	1	2	MTHFD2L
FYN	0.00828885	0.174951	0.341	0.307	1	2	FYN
TTYH3	0.00831094	-0.134678	0.195	0.231	1	2	TTYH3
AKR7A2	0.00832941	-0.106466	0.128	0.161	1	2	AKR7A2
TOX	0.00834024	-0.070462	0.034	0.054	1	2	TOX
PLXDC1	0.0083854	-0.0677065	0.004	0.015	1	2	PLXDC1
LRRN3	0.00842059	-0.180551	0.124	0.155	1	2	LRRN3
CTXND1	0.00845049	-0.0620934	0.011	0.024	1	2	CTXND1
PPP2R2B	0.00848867	-0.0838889	0.137	0.173	1	2	PPP2R2B
PDCD7	0.00849569	-0.0966773	0.058	0.082	1	2	PDCD7
EEPD1	0.00849997	-0.0666449	0.026	0.044	1	2	EEPD1
ASB8	0.00850523	-0.0858332	0.069	0.095	1	2	ASB8
PLS3	0.00851663	0.118097	0.144	0.115	1	2	PLS3
ATP5F1CP1	0.00853258	-0.0534565	0.047	0.07	1	2	ATP5F1CP1
ADAR	0.00854344	-0.156255	0.187	0.223	1	2	ADAR
SPC25	0.00855981	-0.0864382	0.035	0.055	1	2	SPC25
CAPN1	0.00863127	0.121692	0.097	0.074	1	2	CAPN1
RFT1	0.00864908	0.10062	0.056	0.039	1	2	RFT1
GAL3ST4	0.00866023	-0.0810992	0.048	0.07	1	2	GAL3ST4
NDUFB10	0.00867729	-0.0817477	0.416	0.465	1	2	NDUFB10
SEMA6A	0.00868026	-0.087202	0.123	0.157	1	2	SEMA6A
YBX1P2	0.00868904	-0.100344	0.192	0.232	1	2	YBX1P2
OAS1	0.00869591	-0.05189	0.023	0.04	1	2	OAS1
PCOLCE2	0.00871106	-0.0772633	0.014	0.029	1	2	PCOLCE2
PDCD11	0.00872576	0.0657989	0.058	0.041	1	2	PDCD11
KIF21A	0.00875761	-0.136063	0.197	0.236	1	2	KIF21A
CNBD2	0.00878341	-0.056741	0.009	0.021	1	2	CNBD2
FKBP14	0.00882405	-0.0975753	0.048	0.07	1	2	FKBP14
ARPC1B	0.00884023	0.0524848	0.147	0.116	1	2	ARPC1B
ZBTB18	0.00885212	-0.0941337	0.043	0.066	1	2	ZBTB18
ATP6V1G2	0.00886335	-0.0652477	0.031	0.051	1	2	ATP6V1G2
GAPDHP40	0.00889835	-0.097707	0.26	0.304	1	2	GAPDHP40
PHF19	0.00896234	-0.0500025	0.068	0.095	1	2	PHF19
SORCS3	0.00898893	-0.0778244	0.015	0.03	1	2	SORCS3
MTRF1L	0.00900967	0.072186	0.077	0.056	1	2	MTRF1L
SCYL1	0.00902382	0.0985624	0.121	0.095	1	2	SCYL1
MAPRE2	0.00908657	-0.101673	0.123	0.156	1	2	MAPRE2
GET4	0.0091357	0.142312	0.061	0.043	1	2	GET4
BAIAP2	0.00913615	0.0615989	0.078	0.057	1	2	BAIAP2
KIF19	0.00917164	0.0606962	0.018	0.01	1	2	KIF19
PRDX4	0.00921953	-0.151088	0.268	0.308	1	2	PRDX4
RPSAP2	0.00927577	0.0520664	0.058	0.041	1	2	RPSAP2
RPS14P8	0.00928151	0.0676903	0.186	0.154	1	2	RPS14P8
CADM1	0.00928171	0.118415	0.222	0.188	1	2	CADM1
RPL36AL	0.00929214	0.0566332	0.463	0.427	1	2	RPL36AL
ARRDC3	0.00929531	0.0877052	0.143	0.114	1	2	ARRDC3
DAP	0.00931365	-0.0929372	0.104	0.133	1	2	DAP
SLTM	0.00933526	-0.107383	0.147	0.182	1	2	SLTM
HK1	0.00953931	0.0793119	0.085	0.064	1	2	HK1
SCARB2	0.00954527	0.117286	0.302	0.268	1	2	SCARB2
CACNA1E	0.00955164	-0.0516777	0.011	0.024	1	2	CACNA1E
ZNF84	0.00956861	-0.0804817	0.084	0.113	1	2	ZNF84
KIF1B	0.00957991	-0.120674	0.2	0.236	1	2	KIF1B
NUBP2	0.0095839	-0.110123	0.149	0.185	1	2	NUBP2
DNM1	0.00960251	-0.0570154	0.017	0.033	1	2	DNM1
SPAG9	0.00962746	-0.110172	0.18	0.216	1	2	SPAG9
RNF150	0.00970745	-0.0546941	0.012	0.026	1	2	RNF150
SYNGR1	0.00971217	-0.0753921	0.037	0.057	1	2	SYNGR1
RHOBTB3	0.00980176	-0.0632476	0.221	0.263	1	2	RHOBTB3
DSCAM	0.00982204	-0.0678322	0.061	0.086	1	2	DSCAM
COPS6	0.00989047	-0.128007	0.407	0.459	1	2	COPS6
IGFBP4	0.00994001	0.0837787	0.062	0.044	1	2	IGFBP4
AEBP1	0.00999559	0.203613	0.248	0.221	1	2	AEBP1
THOC2	0.0100048	-0.177226	0.142	0.172	1	2	THOC2
PHKG1	0.0101067	-0.0856944	0.321	0.369	1	2	PHKG1
CNTROB	0.0101418	0.0617599	0.073	0.053	1	2	CNTROB
DCTN3	0.0102388	0.082106	0.294	0.261	1	2	DCTN3
NHLH1	0.010254	-0.0553107	0.002	0.011	1	2	NHLH1
KCTD1	0.0102943	-0.0584123	0.025	0.042	1	2	KCTD1
POLR3H	0.0103069	-0.0915113	0.067	0.092	1	2	POLR3H
JMJD1C	0.010327	-0.132063	0.088	0.115	1	2	JMJD1C
PHTF1	0.0103427	-0.0655663	0.032	0.052	1	2	PHTF1
MARCH5	0.0103462	-0.0792757	0.05	0.073	1	2	MARCH5
TNRC6B	0.0103998	-0.109316	0.141	0.174	1	2	TNRC6B
RPL5P1	0.0104396	-0.110224	0.071	0.097	1	2	RPL5P1
NPIPA5	0.0104688	-0.0834311	0.045	0.067	1	2	NPIPA5
RPS27P23	0.0104775	0.0815913	0.048	0.032	1	2	RPS27P23
CNTNAP1	0.0104894	-0.107503	0.035	0.054	1	2	CNTNAP1
TTYH1	0.0105407	-0.125472	0.299	0.35	1	2	TTYH1
ZBTB20	0.0106636	-0.195282	0.13	0.158	1	2	ZBTB20
CAPNS1	0.0107212	0.116266	0.34	0.308	1	2	CAPNS1
PPIAP23	0.0107718	-0.0890613	0.06	0.083	1	2	PPIAP23
HMGB1P6	0.0107739	0.113872	0.129	0.104	1	2	HMGB1P6
EVI5	0.0107758	-0.0938675	0.047	0.068	1	2	EVI5
RPS24P16	0.0108002	0.0509527	0.045	0.03	1	2	RPS24P16
ARHGAP32	0.010808	-0.0516008	0.048	0.07	1	2	ARHGAP32
TBC1D10B	0.0108142	0.0541947	0.092	0.069	1	2	TBC1D10B
ZNRF3	0.0108232	-0.0800303	0.022	0.038	1	2	ZNRF3
PCDH15	0.0108306	-0.0890964	0.027	0.045	1	2	PCDH15
SOX4	0.0108314	0.153391	0.403	0.361	1	2	SOX4
ACOT2	0.0108315	0.0562205	0.096	0.073	1	2	ACOT2
EEF1D	0.0108503	-0.0981243	0.5	0.547	1	2	EEF1D
HSPB11	0.0108684	-0.0542478	0.172	0.211	1	2	HSPB11
THOP1	0.0108687	0.0882602	0.095	0.073	1	2	THOP1
BAALC-AS2	0.0109012	-0.0821853	0.024	0.041	1	2	BAALC-AS2
AGPS	0.0109449	0.0517678	0.076	0.056	1	2	AGPS
PATL1	0.0109566	0.0784008	0.071	0.052	1	2	PATL1
HMGN2	0.0110025	-0.115102	0.515	0.555	1	2	HMGN2
GPR155	0.0110224	-0.118079	0.07	0.096	1	2	GPR155
GAS5	0.0110398	0.137637	0.482	0.455	1	2	GAS5
LINC01003	0.0110544	-0.058175	0.038	0.059	1	2	LINC01003
SRF	0.0111021	0.0719904	0.163	0.134	1	2	SRF
KLHL23	0.0111261	-0.0523133	0.051	0.074	1	2	KLHL23
SMOX	0.0112078	0.126911	0.144	0.117	1	2	SMOX
MXD3	0.0112171	0.122349	0.085	0.065	1	2	MXD3
MLF1	0.0112635	-0.140064	0.088	0.114	1	2	MLF1
GPS1	0.0112693	-0.0879984	0.13	0.164	1	2	GPS1
C9orf3	0.0112708	0.0786808	0.07	0.051	1	2	C9orf3
PSMB9	0.0112994	-0.127659	0.168	0.2	1	2	PSMB9
CBLL1	0.0113439	0.0540445	0.104	0.08	1	2	CBLL1
PDGFD	0.0114083	-0.052151	0.011	0.024	1	2	PDGFD
RPL23P2	0.0114773	0.0847936	0.077	0.057	1	2	RPL23P2
GANAB	0.011497	0.113509	0.201	0.17	1	2	GANAB
PPA2	0.0115467	-0.0887668	0.131	0.164	1	2	PPA2
CYB5R3	0.01156	0.125751	0.247	0.216	1	2	CYB5R3
TMEM243	0.011599	-0.0595189	0.034	0.053	1	2	TMEM243
STX12	0.0116299	-0.0956269	0.128	0.159	1	2	STX12
TSHZ3	0.0116442	0.065072	0.05	0.034	1	2	TSHZ3
FOSB	0.011768	0.106281	0.241	0.208	1	2	FOSB
MYBBP1A	0.0117696	0.0587589	0.09	0.068	1	2	MYBBP1A
ZNF280D	0.0117908	-0.104305	0.044	0.065	1	2	ZNF280D
DNAH7	0.0118804	-0.0852725	0.009	0.021	1	2	DNAH7
TBC1D10A	0.0118889	0.0548165	0.041	0.027	1	2	TBC1D10A
GMFG	0.0118964	-0.0745091	0.019	0.035	1	2	GMFG
SRRM3	0.0119259	-0.0606172	0.017	0.032	1	2	SRRM3
FAM131A	0.0119906	-0.107832	0.104	0.134	1	2	FAM131A
GSTA4	0.0120172	-0.0603738	0.121	0.155	1	2	GSTA4
RASAL2	0.0121195	0.0513801	0.06	0.042	1	2	RASAL2
FRG1CP	0.0121868	0.0527971	0.016	0.008	1	2	FRG1CP
P2RY1	0.0122152	-0.0624067	0.037	0.056	1	2	P2RY1
BSDC1	0.0122174	-0.106674	0.127	0.158	1	2	BSDC1
COL28A1	0.0122467	-0.100693	0.054	0.076	1	2	COL28A1
PTPRJ	0.0122511	0.0740167	0.058	0.042	1	2	PTPRJ
KCTD13	0.0122603	-0.101074	0.077	0.102	1	2	KCTD13
MAP6D1	0.0122962	0.0989546	0.058	0.042	1	2	MAP6D1
ROGDI	0.0123642	-0.0704697	0.039	0.059	1	2	ROGDI
DCHS1	0.0124487	-0.0857512	0.066	0.091	1	2	DCHS1
NR2F6	0.0124537	0.0538767	0.08	0.06	1	2	NR2F6
C1QBPP2	0.0125458	-0.0667505	0.03	0.048	1	2	C1QBPP2
EEF1A1P2	0.0125728	0.0755611	0.048	0.032	1	2	EEF1A1P2
NBEA	0.0126934	-0.0635697	0.028	0.046	1	2	NBEA
DNAAF5	0.0127087	-0.0918865	0.039	0.059	1	2	DNAAF5
MTPN	0.0127103	-0.0943841	0.279	0.324	1	2	MTPN
PRELID3B	0.0129282	-0.0524727	0.126	0.161	1	2	PRELID3B
DANCR	0.0129511	-0.0508572	0.148	0.185	1	2	DANCR
RAB33A	0.0129973	0.123332	0.07	0.052	1	2	RAB33A
NSMCE4A	0.0130408	-0.0836883	0.057	0.081	1	2	NSMCE4A
JAG1	0.0130566	-0.197691	0.114	0.141	1	2	JAG1
ENPP6	0.0130785	0.130435	0.038	0.025	1	2	ENPP6
PPIC	0.0130865	-0.091484	0.057	0.08	1	2	PPIC
STAU2	0.013155	-0.0557596	0.051	0.073	1	2	STAU2
CREB3	0.0131561	0.0589369	0.116	0.091	1	2	CREB3
CDKN1B	0.0131991	-0.0548858	0.139	0.175	1	2	CDKN1B
SNRPEP5	0.0132092	-0.0500639	0.015	0.029	1	2	SNRPEP5
FZD4	0.0132623	0.0501502	0.017	0.009	1	2	FZD4
AFMID	0.0132887	0.111714	0.076	0.057	1	2	AFMID
ATP6V0E1	0.0132995	0.133685	0.343	0.315	1	2	ATP6V0E1
PTPRA	0.0133592	-0.0586639	0.205	0.244	1	2	PTPRA
PRPF38A	0.0133696	-0.0716387	0.091	0.119	1	2	PRPF38A
CLU	0.0133761	0.12526	0.647	0.646	1	2	CLU
LDHB	0.0134114	-0.113985	0.676	0.703	1	2	LDHB
FAM86EP	0.0134439	0.0638905	0.037	0.024	1	2	FAM86EP
SUB1P3	0.0135496	-0.0523988	0.121	0.154	1	2	SUB1P3
SETBP1	0.0135686	-0.0582777	0.031	0.049	1	2	SETBP1
MARC2	0.0136178	-0.0759281	0.022	0.037	1	2	MARC2
PURB	0.0136506	-0.0573616	0.174	0.212	1	2	PURB
ABAT	0.0136676	-0.0555654	0.147	0.184	1	2	ABAT
CEND1	0.0136796	-0.05138	0.045	0.067	1	2	CEND1
ADAM22	0.0137221	-0.0680959	0.068	0.093	1	2	ADAM22
EBPL	0.0137712	-0.0847588	0.12	0.151	1	2	EBPL
GAPDHP1	0.0137846	-0.0820645	0.084	0.111	1	2	GAPDHP1
CADM3	0.0138134	0.165392	0.055	0.039	1	2	CADM3
RPS16P9	0.0138359	0.0637062	0.036	0.023	1	2	RPS16P9
ZHX2	0.0138381	-0.0560526	0.017	0.032	1	2	ZHX2
RTN3	0.0138387	-0.175756	0.392	0.432	1	2	RTN3
DDX51	0.0139031	0.0871251	0.071	0.053	1	2	DDX51
DNMT3A	0.0139294	-0.0910166	0.069	0.093	1	2	DNMT3A
ARNT2	0.013932	-0.0840672	0.106	0.135	1	2	ARNT2
UBALD1	0.0139638	-0.0735015	0.025	0.041	1	2	UBALD1
PPIAP3	0.013983	-0.0612147	0.147	0.182	1	2	PPIAP3
INTS11	0.0139888	-0.0836889	0.074	0.099	1	2	INTS11
ZMAT3	0.0140666	-0.113092	0.184	0.222	1	2	ZMAT3
POLR2H	0.0141047	0.0966381	0.252	0.222	1	2	POLR2H
SCG3	0.0142019	-0.14031	0.117	0.145	1	2	SCG3
OGA	0.0142038	-0.145152	0.123	0.153	1	2	OGA
CA14	0.0142348	-0.0634226	0.023	0.039	1	2	CA14
IFI6	0.014286	-0.138403	0.474	0.509	1	2	IFI6
EEF1AKNMT	0.0142953	-0.07843	0.029	0.047	1	2	EEF1AKNMT
LRRTM2	0.0143158	-0.104108	0.055	0.078	1	2	LRRTM2
PLXNB1	0.0143736	-0.134204	0.058	0.081	1	2	PLXNB1
PIANP	0.014411	-0.0726016	0.042	0.063	1	2	PIANP
PDHB	0.014512	-0.101682	0.202	0.24	1	2	PDHB
CEP295	0.0145791	-0.0653057	0.019	0.034	1	2	CEP295
CEBPD	0.0146033	0.17605	0.33	0.31	1	2	CEBPD
FARP1	0.0146633	-0.070217	0.071	0.096	1	2	FARP1
UBE2E3	0.0147314	-0.0559438	0.192	0.229	1	2	UBE2E3
MT-ATP8	0.0147463	0.0507428	0.07	0.051	1	2	MT-ATP8
SACS	0.0147878	-0.0834323	0.075	0.1	1	2	SACS
NCAPG2	0.0149159	-0.0985	0.065	0.089	1	2	NCAPG2
C19orf24	0.0149371	0.057061	0.187	0.156	1	2	C19orf24
PCNA	0.0149881	-0.155596	0.188	0.224	1	2	PCNA
TPX2	0.0149927	-0.0735184	0.064	0.088	1	2	TPX2
SEMA6D	0.0150103	-0.0587601	0.075	0.1	1	2	SEMA6D
PDPK1	0.0150153	0.0607185	0.087	0.066	1	2	PDPK1
FRMD5	0.0150171	0.118232	0.04	0.027	1	2	FRMD5
ZADH2	0.0150361	-0.0762791	0.035	0.053	1	2	ZADH2
UCHL1	0.0150376	0.0926544	0.551	0.514	1	2	UCHL1
MAPK10	0.0152453	-0.12089	0.048	0.068	1	2	MAPK10
CSPP1	0.0152992	-0.0746291	0.055	0.077	1	2	CSPP1
KNL1	0.0153408	0.0888641	0.035	0.022	1	2	KNL1
RPL6P27	0.0153559	-0.0696232	0.168	0.205	1	2	RPL6P27
ATIC	0.0155739	0.103355	0.131	0.106	1	2	ATIC
USP6	0.0155951	-0.0500127	0.018	0.033	1	2	USP6
SNRPB2	0.0155993	-0.0589863	0.286	0.328	1	2	SNRPB2
LAMP1	0.0156229	0.128635	0.329	0.296	1	2	LAMP1
ZSCAN30	0.0156485	-0.0550715	0.036	0.054	1	2	ZSCAN30
HOMER3	0.0156739	0.0681571	0.08	0.06	1	2	HOMER3
PPIAP50	0.0157121	-0.0513599	0.053	0.075	1	2	PPIAP50
TGFBR1	0.0157326	0.0710374	0.084	0.064	1	2	TGFBR1
CLIP2	0.0157816	-0.0910308	0.141	0.171	1	2	CLIP2
ZSWIM6	0.0157972	0.125409	0.088	0.068	1	2	ZSWIM6
PNPLA8	0.0158211	-0.11689	0.159	0.19	1	2	PNPLA8
LPCAT1	0.0158707	0.0616284	0.148	0.12	1	2	LPCAT1
INPP5E	0.0159058	0.0734779	0.051	0.035	1	2	INPP5E
API5	0.0159298	0.0515706	0.153	0.125	1	2	API5
CBR1	0.0159434	-0.0501565	0.293	0.344	1	2	CBR1
NUP85	0.0159809	-0.123751	0.06	0.081	1	2	NUP85
BHLHE22	0.0160322	-0.100806	0.004	0.014	1	2	BHLHE22
PIK3R1	0.016033	-0.0970467	0.167	0.201	1	2	PIK3R1
MUS81	0.0162264	0.0578097	0.154	0.126	1	2	MUS81
FNBP1	0.0163283	-0.072326	0.064	0.087	1	2	FNBP1
MOSPD3	0.0163286	-0.0530045	0.103	0.131	1	2	MOSPD3
MTFMT	0.0163588	-0.0605197	0.027	0.044	1	2	MTFMT
MGLL	0.0164216	0.0989805	0.129	0.104	1	2	MGLL
GPR180	0.016479	0.0869733	0.06	0.043	1	2	GPR180
SNN	0.016488	-0.0768036	0.129	0.159	1	2	SNN
POGZ	0.0166315	-0.0556274	0.106	0.135	1	2	POGZ
EPHB1	0.0166825	0.110768	0.097	0.077	1	2	EPHB1
SELENOF	0.016711	-0.111158	0.233	0.271	1	2	SELENOF
WDR53	0.0167421	0.0519369	0.044	0.03	1	2	WDR53
METTL7A	0.0167483	-0.0567428	0.223	0.265	1	2	METTL7A
EEF1DP5	0.0167684	-0.05143	0.105	0.135	1	2	EEF1DP5
IGFBP3	0.0168533	0.101888	0.073	0.053	1	2	IGFBP3
NHP2P1	0.0171097	-0.0761354	0.065	0.087	1	2	NHP2P1
RPL10	0.0171753	-0.085158	0.921	0.9	1	2	RPL10
WAC-AS1	0.0171962	-0.0720012	0.032	0.05	1	2	WAC-AS1
PPIAP83	0.0172475	-0.0849945	0.078	0.101	1	2	PPIAP83
UBL4A	0.0172521	0.110219	0.092	0.072	1	2	UBL4A
PRRT2	0.0172675	-0.0522075	0.021	0.035	1	2	PRRT2
YKT6	0.0172696	0.112508	0.229	0.201	1	2	YKT6
ADGRB3	0.0172958	-0.0519656	0.031	0.049	1	2	ADGRB3
NPTX2	0.0173143	-0.0752873	0.002	0.01	1	2	NPTX2
MT-ND4	0.0173291	-0.153163	0.373	0.411	1	2	MT-ND4
CCDC184	0.0173362	0.0626872	0.024	0.014	1	2	CCDC184
MTCO1P12	0.0174087	-0.107274	0.069	0.092	1	2	MTCO1P12
SIKE1	0.0174344	-0.0806038	0.085	0.111	1	2	SIKE1
ATR	0.0174911	0.0843225	0.058	0.042	1	2	ATR
SRP14P2	0.017503	0.103822	0.109	0.087	1	2	SRP14P2
PABPC4	0.0175119	0.0617071	0.158	0.13	1	2	PABPC4
MRPL16	0.0175852	-0.0828726	0.098	0.125	1	2	MRPL16
IFRD1	0.0176119	0.090582	0.306	0.276	1	2	IFRD1
MSI1	0.0176535	-0.0777024	0.075	0.099	1	2	MSI1
UQCR10	0.0176547	-0.105881	0.647	0.662	1	2	UQCR10
ALG3	0.0176718	0.073589	0.116	0.092	1	2	ALG3
ATP5PB	0.0177328	-0.107318	0.28	0.319	1	2	ATP5PB
NAB1	0.017761	-0.0606277	0.055	0.077	1	2	NAB1
YES1	0.0178282	-0.0545992	0.081	0.107	1	2	YES1
CHST12	0.0178284	-0.0519652	0.069	0.093	1	2	CHST12
CRELD2	0.0179273	-0.0573838	0.092	0.119	1	2	CRELD2
RAD9A	0.0179358	0.0587848	0.04	0.027	1	2	RAD9A
RPL30P3	0.0180291	0.0860445	0.028	0.017	1	2	RPL30P3
TMEM94	0.0180808	-0.0807441	0.048	0.068	1	2	TMEM94
ATAD2B	0.0181725	-0.0759411	0.023	0.038	1	2	ATAD2B
RNF40	0.0182115	0.066961	0.135	0.11	1	2	RNF40
KIF22	0.018305	0.0581152	0.14	0.114	1	2	KIF22
UGT8	0.0183057	0.167805	0.064	0.047	1	2	UGT8
ASRGL1	0.0183468	-0.0653898	0.111	0.141	1	2	ASRGL1
DMTF1	0.0183569	-0.0918375	0.122	0.152	1	2	DMTF1
RAP2A	0.0183764	0.116653	0.172	0.146	1	2	RAP2A
RABEP1	0.0183945	-0.0884494	0.105	0.133	1	2	RABEP1
PXYLP1	0.0183963	-0.0914543	0.032	0.05	1	2	PXYLP1
TCTEX1D2	0.0185288	-0.0818044	0.159	0.193	1	2	TCTEX1D2
AEN	0.018579	-0.058735	0.062	0.084	1	2	AEN
FAM107B	0.018581	-0.0835556	0.038	0.057	1	2	FAM107B
LDLRAD3	0.0185897	-0.101048	0.082	0.107	1	2	LDLRAD3
TMEM106B	0.0186208	-0.0838333	0.188	0.223	1	2	TMEM106B
TST	0.0186233	-0.0666632	0.032	0.05	1	2	TST
ZNF521	0.0186811	-0.0786267	0.047	0.066	1	2	ZNF521
PSMA2P2	0.0186985	-0.0667007	0.075	0.099	1	2	PSMA2P2
GADD45A	0.0187913	0.177801	0.339	0.314	1	2	GADD45A
GPM6B	0.0189076	-0.172719	0.549	0.577	1	2	GPM6B
SOX11	0.018937	-0.101795	0.233	0.271	1	2	SOX11
HOXD10	0.0191875	-0.0579004	0.032	0.05	1	2	HOXD10
PRIMPOL	0.0191994	0.0507492	0.03	0.019	1	2	PRIMPOL
OARD1	0.0192892	-0.0974844	0.067	0.091	1	2	OARD1
NFKBIB	0.0194072	0.0748637	0.093	0.072	1	2	NFKBIB
MTHFD1	0.0194343	0.0657989	0.163	0.137	1	2	MTHFD1
SLC9A9	0.0194789	-0.0585814	0.014	0.027	1	2	SLC9A9
EMC10	0.0195689	-0.0937439	0.208	0.245	1	2	EMC10
GALNT8	0.0196265	0.0573493	0.023	0.013	1	2	GALNT8
CACNG7	0.0196748	-0.0551267	0.098	0.126	1	2	CACNG7
MED20	0.0197069	0.0581026	0.04	0.027	1	2	MED20
FOXD3	0.0197297	0.070986	0.022	0.013	1	2	FOXD3
PTBP2	0.019737	-0.0569718	0.077	0.101	1	2	PTBP2
SEC14L2	0.0197794	0.0521	0.108	0.085	1	2	SEC14L2
LIMS2	0.0197957	0.103229	0.026	0.016	1	2	LIMS2
PNRC1	0.0198368	0.103252	0.273	0.243	1	2	PNRC1
TRMT61A	0.0198489	0.0531969	0.056	0.04	1	2	TRMT61A
ANKFY1	0.0199165	-0.0880362	0.073	0.096	1	2	ANKFY1
PPIAP60	0.0199387	-0.0829342	0.068	0.09	1	2	PPIAP60
NPIPB2	0.0199547	-0.0613474	0.015	0.028	1	2	NPIPB2
LAMA4	0.0199739	0.0515788	0.115	0.091	1	2	LAMA4
PDPN	0.0200136	0.132206	0.242	0.214	1	2	PDPN
MRPS34	0.020101	-0.0876248	0.246	0.283	1	2	MRPS34
CNOT8	0.0201153	-0.062045	0.068	0.091	1	2	CNOT8
VCAN	0.0201648	0.0720024	0.326	0.297	1	2	VCAN
MRPS28	0.0202071	-0.0571001	0.188	0.224	1	2	MRPS28
PRPSAP2	0.020374	-0.0722638	0.088	0.114	1	2	PRPSAP2
ANAPC11	0.020407	-0.0700785	0.547	0.585	1	2	ANAPC11
SRPRA	0.0204252	-0.0882525	0.045	0.064	1	2	SRPRA
ATP5PO	0.0204391	-0.075638	0.391	0.436	1	2	ATP5PO
HNRNPC	0.0205156	0.0766172	0.519	0.498	1	2	HNRNPC
FAHD2A	0.0205887	-0.0836752	0.082	0.107	1	2	FAHD2A
UBE4A	0.0207077	-0.126719	0.096	0.12	1	2	UBE4A
METTL7B	0.0207403	-0.11257	0.128	0.158	1	2	METTL7B
LRRC8A	0.0207471	-0.0550367	0.12	0.149	1	2	LRRC8A
DCN	0.0207755	-0.143907	0.234	0.269	1	2	DCN
UBN2	0.0207829	-0.0997182	0.069	0.092	1	2	UBN2
IST1	0.020885	-0.131804	0.141	0.17	1	2	IST1
RPL7P15	0.0211215	0.0630419	0.095	0.074	1	2	RPL7P15
URM1	0.0211257	0.109137	0.128	0.104	1	2	URM1
ZNF746	0.021191	0.109156	0.073	0.055	1	2	ZNF746
NUPR1	0.0211996	0.0890573	0.277	0.243	1	2	NUPR1
MORN2	0.0212187	-0.0972149	0.167	0.197	1	2	MORN2
TDRP	0.0213108	-0.127704	0.036	0.053	1	2	TDRP
BNIP3L	0.0213751	0.0646756	0.277	0.247	1	2	BNIP3L
CBX3P9	0.0213922	-0.0565662	0.091	0.117	1	2	CBX3P9
PSMD4	0.0214042	-0.100716	0.276	0.318	1	2	PSMD4
DNAJB1	0.0215468	0.205162	0.398	0.37	1	2	DNAJB1
LMBR1	0.0215954	-0.0881647	0.131	0.16	1	2	LMBR1
VTA1	0.0216415	0.106823	0.156	0.131	1	2	VTA1
KATNB1	0.0217011	-0.061268	0.039	0.057	1	2	KATNB1
RPL30P4	0.0217134	0.0704962	0.382	0.356	1	2	RPL30P4
CDC20	0.0217469	0.084127	0.085	0.066	1	2	CDC20
GPT2	0.021751	-0.119257	0.147	0.178	1	2	GPT2
PPP6R3	0.0217532	-0.118434	0.107	0.132	1	2	PPP6R3
MPLKIP	0.0217624	-0.0955431	0.167	0.201	1	2	MPLKIP
HLTF	0.0217689	-0.0662615	0.101	0.128	1	2	HLTF
IL17D	0.0218988	-0.0630332	0.035	0.052	1	2	IL17D
IQCD	0.0219116	-0.0566921	0.017	0.031	1	2	IQCD
CHD6	0.0219238	-0.124568	0.067	0.088	1	2	CHD6
BTF3P5	0.0219938	-0.0517271	0.09	0.115	1	2	BTF3P5
PHKA2	0.0220255	0.0783567	0.04	0.027	1	2	PHKA2
COL16A1	0.0220708	-0.0815952	0.065	0.087	1	2	COL16A1
ISG15	0.0222093	-0.234808	0.187	0.217	1	2	ISG15
ZNF862	0.0222498	-0.0742138	0.042	0.061	1	2	ZNF862
IFT81	0.0223075	-0.0860199	0.054	0.074	1	2	IFT81
NFXL1	0.0223833	-0.0515565	0.018	0.032	1	2	NFXL1
SMURF2	0.0224071	0.0561155	0.089	0.069	1	2	SMURF2
LINC01102	0.0224081	-0.0545281	0.011	0.022	1	2	LINC01102
UBC	0.0224626	0.077415	0.764	0.763	1	2	UBC
SCARB1	0.022631	0.0981409	0.107	0.086	1	2	SCARB1
SNRPD3	0.0227089	-0.105756	0.306	0.346	1	2	SNRPD3
MIDN	0.0227507	0.0629029	0.273	0.241	1	2	MIDN
DPP8	0.0227982	-0.109583	0.049	0.067	1	2	DPP8
SNAPIN	0.0228398	-0.0545655	0.146	0.176	1	2	SNAPIN
RPL30P15	0.022858	0.0612639	0.036	0.024	1	2	RPL30P15
TMEM9B	0.0228613	-0.0582146	0.198	0.232	1	2	TMEM9B
RAB40C	0.0229209	0.0536481	0.039	0.026	1	2	RAB40C
CSE1L	0.0229614	-0.0769801	0.101	0.127	1	2	CSE1L
ANAPC4	0.0230865	0.0805397	0.092	0.072	1	2	ANAPC4
CNIH1	0.023096	-0.0631688	0.104	0.131	1	2	CNIH1
RPSAP28	0.0231134	-0.0573165	0.038	0.056	1	2	RPSAP28
SURF2	0.0232093	-0.0881371	0.071	0.094	1	2	SURF2
CDC37	0.0232221	0.0791274	0.237	0.208	1	2	CDC37
ARHGEF26	0.0233235	-0.116349	0.108	0.134	1	2	ARHGEF26
MAN2C1	0.0233444	0.0620393	0.084	0.065	1	2	MAN2C1
NFS1	0.0233496	-0.102905	0.07	0.092	1	2	NFS1
PEX10	0.0233531	0.0857472	0.119	0.096	1	2	PEX10
NME3	0.0233874	-0.0773099	0.226	0.26	1	2	NME3
ZCCHC24	0.0234073	-0.0620752	0.067	0.089	1	2	ZCCHC24
ABL1	0.0234908	0.0974942	0.083	0.065	1	2	ABL1
OIP5-AS1	0.0234928	-0.0678462	0.124	0.153	1	2	OIP5-AS1
HEPACAM	0.0235008	-0.0873015	0.17	0.199	1	2	HEPACAM
DCP2	0.0235631	-0.0774077	0.065	0.087	1	2	DCP2
SVBP	0.0235879	-0.0634566	0.047	0.066	1	2	SVBP
FAM107A	0.0236693	-0.134407	0.124	0.099	1	2	FAM107A
CLPTM1	0.0236782	0.0523696	0.152	0.125	1	2	CLPTM1
TGDS	0.0236801	0.0653253	0.037	0.025	1	2	TGDS
ALKBH4	0.0237669	-0.0799471	0.056	0.076	1	2	ALKBH4
BECN1	0.0237856	-0.101693	0.098	0.123	1	2	BECN1
SLC11A2	0.02401	0.0625846	0.133	0.109	1	2	SLC11A2
TMEM165	0.0240976	0.0551113	0.168	0.141	1	2	TMEM165
CSTF3	0.0242321	-0.0644469	0.122	0.152	1	2	CSTF3
PSAP	0.0242821	0.117627	0.515	0.497	1	2	PSAP
MAP7D1	0.0243468	0.0632061	0.177	0.151	1	2	MAP7D1
ALDH1B1	0.0244055	0.0966681	0.041	0.028	1	2	ALDH1B1
LPP	0.0245995	0.105623	0.128	0.104	1	2	LPP
RPS19	0.0247529	-0.0620016	0.952	0.932	1	2	RPS19
ALDH9A1	0.0247865	-0.123634	0.133	0.161	1	2	ALDH9A1
CHMP2A	0.0247941	-0.0794875	0.321	0.364	1	2	CHMP2A
SNX6	0.024833	-0.108682	0.113	0.138	1	2	SNX6
PCDH17	0.0248394	-0.0903722	0.18	0.213	1	2	PCDH17
NAA25	0.0249174	-0.0849694	0.049	0.067	1	2	NAA25
NR4A1	0.0249742	-0.0717278	0.119	0.095	1	2	NR4A1
CLCN7	0.0251915	0.0687601	0.076	0.058	1	2	CLCN7
TRAPPC4	0.0253246	-0.0993625	0.153	0.183	1	2	TRAPPC4
ZDHHC22	0.0253261	-0.0579572	0.037	0.054	1	2	ZDHHC22
RPS17P2	0.0254118	0.0650684	0.063	0.047	1	2	RPS17P2
CLK1	0.0254181	-0.20122	0.168	0.195	1	2	CLK1
WASHC3	0.0254263	-0.0635122	0.073	0.096	1	2	WASHC3
GATD3A	0.0255286	-0.0862967	0.115	0.142	1	2	GATD3A
PPFIA3	0.0255958	-0.052061	0.014	0.026	1	2	PPFIA3
MT-ND4L	0.0256121	-0.0697352	0.083	0.108	1	2	MT-ND4L
PPFIA4	0.0257275	-0.0742376	0.019	0.033	1	2	PPFIA4
COMMD6	0.025742	0.115599	0.478	0.464	1	2	COMMD6
DLX5	0.0257717	0.156816	0.05	0.036	1	2	DLX5
C12orf4	0.0258872	0.0699126	0.051	0.036	1	2	C12orf4
ZNF519	0.0259049	-0.0527612	0.022	0.036	1	2	ZNF519
RAB3IP	0.0259056	-0.0902976	0.137	0.167	1	2	RAB3IP
RPS10P3	0.0259866	0.0624433	0.397	0.374	1	2	RPS10P3
AFDN	0.0261234	-0.0640286	0.069	0.092	1	2	AFDN
PIMREG	0.0261402	0.16579	0.088	0.069	1	2	PIMREG
SAP30	0.0261671	0.0688083	0.186	0.157	1	2	SAP30
NOG	0.0262339	-0.0575296	0.006	0.016	1	2	NOG
MRPL41	0.0262512	-0.0526311	0.181	0.217	1	2	MRPL41
MEST	0.0262827	-0.159086	0.196	0.224	1	2	MEST
NFE2L1	0.026299	0.0677625	0.198	0.171	1	2	NFE2L1
SH3BP5	0.0263235	0.107913	0.048	0.034	1	2	SH3BP5
GSTM3	0.0263373	-0.0834978	0.177	0.211	1	2	GSTM3
MRPS5	0.026583	-0.092927	0.14	0.169	1	2	MRPS5
INTS10	0.0266206	-0.11042	0.121	0.148	1	2	INTS10
GOLGA5	0.0267539	0.0566803	0.065	0.048	1	2	GOLGA5
PEA15	0.0267635	-0.142513	0.386	0.424	1	2	PEA15
EXOC7	0.0267814	-0.0843666	0.142	0.172	1	2	EXOC7
TRIM24	0.0268315	-0.11517	0.152	0.18	1	2	TRIM24
ABLIM1	0.0269041	-0.0541634	0.069	0.091	1	2	ABLIM1
IMMP2L	0.0269228	0.0977221	0.104	0.083	1	2	IMMP2L
TOR1B	0.0270522	-0.057557	0.027	0.042	1	2	TOR1B
TADA3	0.0270824	0.0505614	0.163	0.137	1	2	TADA3
CCK	0.0270989	0.121199	0.021	0.012	1	2	CCK
C11orf74	0.0272289	-0.0805962	0.063	0.083	1	2	C11orf74
MRPL11	0.0272472	-0.0826397	0.128	0.154	1	2	MRPL11
RTN1	0.0273402	-0.0981662	0.029	0.045	1	2	RTN1
PSMD10	0.0273908	-0.0855761	0.121	0.149	1	2	PSMD10
NPAS3	0.027413	-0.0969009	0.135	0.163	1	2	NPAS3
SPEN	0.0274935	-0.103331	0.093	0.117	1	2	SPEN
FBL	0.0275329	0.0590959	0.273	0.242	1	2	FBL
TRPC4AP	0.0275707	0.0610335	0.13	0.106	1	2	TRPC4AP
LAMP2	0.0278053	0.0847033	0.265	0.235	1	2	LAMP2
ZDHHC8	0.028028	0.104126	0.055	0.041	1	2	ZDHHC8
SCD5	0.0282357	-0.132609	0.387	0.425	1	2	SCD5
MFSD5	0.0282381	0.0652122	0.082	0.063	1	2	MFSD5
C17orf80	0.0282836	-0.0598126	0.032	0.049	1	2	C17orf80
NPM3	0.0283745	-0.0734602	0.055	0.075	1	2	NPM3
KIF5C	0.0284226	-0.1173	0.097	0.121	1	2	KIF5C
HSPA13	0.0284738	-0.0895306	0.153	0.183	1	2	HSPA13
PALLD	0.0284763	0.0717023	0.166	0.14	1	2	PALLD
CHD1	0.0285117	-0.101717	0.094	0.117	1	2	CHD1
UGDH	0.0288762	0.0661928	0.097	0.077	1	2	UGDH
PCMT1	0.0288864	0.0684726	0.266	0.239	1	2	PCMT1
PPP1CB	0.0290015	0.109797	0.43	0.414	1	2	PPP1CB
SASH1	0.0290692	-0.0911507	0.067	0.087	1	2	SASH1
MCUR1P1	0.0291473	-0.0526517	0.014	0.026	1	2	MCUR1P1
VMA21	0.0291506	-0.126145	0.174	0.202	1	2	VMA21
RCCD1	0.0291658	-0.0567341	0.015	0.027	1	2	RCCD1
PI4KB	0.0291795	-0.0594834	0.097	0.122	1	2	PI4KB
SMURF1	0.0291858	0.0658476	0.065	0.049	1	2	SMURF1
MIR4458HG	0.0292499	-0.0579202	0.177	0.214	1	2	MIR4458HG
IVD	0.0294307	-0.0636304	0.093	0.117	1	2	IVD
TTN	0.0295706	-0.0511428	0.009	0.018	1	2	TTN
ZNF345	0.029804	0.0551669	0.029	0.019	1	2	ZNF345
CXADR	0.0298742	-0.0783872	0.119	0.145	1	2	CXADR
TOP2B	0.0299879	-0.069743	0.202	0.237	1	2	TOP2B
TXNP6	0.0300268	0.0729246	0.155	0.129	1	2	TXNP6
MZT2A	0.0301932	-0.0618922	0.256	0.289	1	2	MZT2A
IER5	0.030276	0.0875974	0.156	0.131	1	2	IER5
CDH20	0.0303189	-0.0570083	0.015	0.027	1	2	CDH20
SUMO1	0.0304948	-0.0562349	0.21	0.244	1	2	SUMO1
RPL7A	0.0305457	0.056324	0.667	0.638	1	2	RPL7A
MICOS10P2	0.0306851	-0.139096	0.198	0.229	1	2	MICOS10P2
BMPR1B	0.0307115	-0.0588066	0.042	0.059	1	2	BMPR1B
ZNF638	0.0307588	-0.0690777	0.15	0.182	1	2	ZNF638
PRDX2	0.0307687	-0.126387	0.504	0.544	1	2	PRDX2
GTPBP10	0.0308682	-0.060578	0.054	0.073	1	2	GTPBP10
AP4M1	0.0310119	0.0809793	0.09	0.071	1	2	AP4M1
UBAC2	0.0310527	-0.0646286	0.083	0.107	1	2	UBAC2
PHF21B	0.0311214	-0.059186	0.025	0.039	1	2	PHF21B
MDH1	0.0311685	-0.118606	0.248	0.28	1	2	MDH1
MAP3K7	0.0312073	0.0672485	0.113	0.091	1	2	MAP3K7
C18orf54	0.0312804	-0.0510516	0.019	0.032	1	2	C18orf54
LINC01896	0.0312919	-0.128083	0.145	0.176	1	2	LINC01896
SEC13	0.0312975	0.0674301	0.315	0.286	1	2	SEC13
AIG1	0.0313472	-0.141393	0.144	0.169	1	2	AIG1
ST8SIA4	0.0313752	0.069909	0.041	0.029	1	2	ST8SIA4
PANK2	0.0315016	0.0544334	0.085	0.067	1	2	PANK2
UFL1	0.0315141	0.0526488	0.102	0.082	1	2	UFL1
TMUB1	0.0315654	0.121398	0.165	0.14	1	2	TMUB1
TMEM184C	0.0315959	0.0676833	0.07	0.054	1	2	TMEM184C
TAF10	0.0317528	0.055902	0.311	0.278	1	2	TAF10
NUAK1	0.0317541	-0.0503888	0.018	0.031	1	2	NUAK1
NORAD	0.0318027	-0.107601	0.32	0.358	1	2	NORAD
RPL10P3	0.031849	-0.0918578	0.14	0.169	1	2	RPL10P3
SRRD	0.0318839	-0.0739148	0.036	0.052	1	2	SRRD
MAP2K3	0.0320054	0.0549509	0.066	0.05	1	2	MAP2K3
RALGDS	0.032016	0.061358	0.108	0.087	1	2	RALGDS
ACADM	0.0320746	-0.0921602	0.108	0.132	1	2	ACADM
KIF3B	0.0321222	-0.0517811	0.058	0.078	1	2	KIF3B
HLA-G	0.0321563	-0.0596398	0.129	0.103	1	2	HLA-G
TXNDC12	0.032159	-0.0681162	0.117	0.144	1	2	TXNDC12
P3H3	0.032179	-0.0625963	0.012	0.022	1	2	P3H3
ADNP	0.0322043	-0.090645	0.124	0.152	1	2	ADNP
SEL1L	0.0322535	0.107308	0.15	0.127	1	2	SEL1L
ADH5	0.032535	0.103071	0.209	0.182	1	2	ADH5
KANK2	0.0326378	-0.157274	0.066	0.049	1	2	KANK2
ZNHIT1	0.0327838	-0.0804288	0.484	0.519	1	2	ZNHIT1
AMZ2	0.0328164	-0.0833065	0.146	0.175	1	2	AMZ2
TSFM	0.0329018	0.104142	0.281	0.253	1	2	TSFM
HIP1	0.0330687	-0.0545467	0.134	0.162	1	2	HIP1
CASK	0.0332461	-0.0967706	0.148	0.177	1	2	CASK
YBX1P1	0.0334571	-0.0975557	0.082	0.105	1	2	YBX1P1
BAG1	0.0335781	0.0924254	0.162	0.138	1	2	BAG1
SMARCD3	0.0336614	-0.0778338	0.162	0.191	1	2	SMARCD3
PSMD8	0.0336727	0.0816576	0.391	0.369	1	2	PSMD8
NFIB	0.0336793	-0.0625114	0.311	0.349	1	2	NFIB
NDUFB8	0.0338108	-0.0886097	0.346	0.385	1	2	NDUFB8
ZNF655	0.0338609	-0.106238	0.142	0.169	1	2	ZNF655
SAP18	0.0340217	-0.118879	0.381	0.41	1	2	SAP18
DPP7	0.0340244	0.071456	0.214	0.188	1	2	DPP7
LMAN2	0.0340696	0.0659813	0.284	0.256	1	2	LMAN2
CBL	0.034237	-0.0561981	0.052	0.071	1	2	CBL
DCAF17	0.0342804	0.0564696	0.042	0.03	1	2	DCAF17
KIF3A	0.0343898	-0.0871763	0.117	0.142	1	2	KIF3A
AGPAT3	0.0345031	-0.0824782	0.089	0.111	1	2	AGPAT3
RNF11	0.034532	-0.0720348	0.157	0.185	1	2	RNF11
RFESD	0.0346329	0.0588575	0.017	0.01	1	2	RFESD
TCEA2	0.0347139	-0.0687094	0.205	0.237	1	2	TCEA2
COX11	0.0347657	-0.0631885	0.097	0.122	1	2	COX11
CST3	0.0347811	-0.0723918	0.707	0.737	1	2	CST3
GEMIN7	0.0347864	0.0858173	0.076	0.059	1	2	GEMIN7
DAAM2	0.0347932	-0.0649095	0.04	0.028	1	2	DAAM2
APEH	0.0347994	0.0872871	0.142	0.118	1	2	APEH
AXIN1	0.0348532	0.0721076	0.076	0.058	1	2	AXIN1
MRFAP1	0.0350207	-0.0554319	0.475	0.52	1	2	MRFAP1
PLEKHJ1	0.0350305	-0.0914227	0.149	0.176	1	2	PLEKHJ1
CHCHD2P6	0.0350949	-0.155688	0.509	0.512	1	2	CHCHD2P6
PCNT	0.0351295	-0.07013	0.042	0.059	1	2	PCNT
CENPM	0.0351962	-0.0525624	0.055	0.075	1	2	CENPM
SLC2A8	0.0353396	0.0566073	0.053	0.039	1	2	SLC2A8
HMGN1	0.0353529	-0.0823147	0.408	0.447	1	2	HMGN1
CDK16	0.035448	0.0857736	0.172	0.147	1	2	CDK16
ZNF664	0.0354939	-0.0891565	0.144	0.172	1	2	ZNF664
GTF2B	0.0363263	-0.0926611	0.083	0.105	1	2	GTF2B
RNF19B	0.0363624	0.0678112	0.051	0.037	1	2	RNF19B
MPRIP	0.0363684	-0.0966634	0.132	0.159	1	2	MPRIP
HIST2H2BE	0.0364137	-0.0606786	0.029	0.044	1	2	HIST2H2BE
COBL	0.0364873	-0.0707571	0.062	0.081	1	2	COBL
NUSAP1	0.0365225	0.102679	0.133	0.111	1	2	NUSAP1
NCAPD3	0.0366505	-0.051728	0.045	0.063	1	2	NCAPD3
RASD1	0.0366721	0.130565	0.095	0.076	1	2	RASD1
DLL1	0.036761	-0.0906337	0.025	0.038	1	2	DLL1
ATPAF2	0.0368081	-0.0843583	0.031	0.046	1	2	ATPAF2
REV3L	0.0369526	-0.15524	0.135	0.16	1	2	REV3L
GRINA	0.0371821	0.082725	0.325	0.295	1	2	GRINA
VIPR2	0.037252	-0.0821756	0.04	0.057	1	2	VIPR2
RGL1	0.0373327	-0.125351	0.045	0.062	1	2	RGL1
DHPS	0.0375226	-0.10008	0.202	0.234	1	2	DHPS
TXNRD2	0.0376452	-0.0577191	0.031	0.046	1	2	TXNRD2
GRIK2	0.0379994	-0.0608072	0.048	0.066	1	2	GRIK2
SULF2	0.0380133	-0.0983983	0.087	0.109	1	2	SULF2
ANK3	0.0381746	-0.0716826	0.035	0.05	1	2	ANK3
SHOC2	0.0381973	0.0640057	0.065	0.05	1	2	SHOC2
CMTM5	0.0382157	-0.089486	0.029	0.044	1	2	CMTM5
FSTL3	0.038309	0.0549916	0.021	0.013	1	2	FSTL3
JKAMP	0.0385237	-0.11299	0.084	0.105	1	2	JKAMP
CEP95	0.0385539	-0.0703643	0.06	0.079	1	2	CEP95
PRCP	0.0386136	-0.0830524	0.148	0.176	1	2	PRCP
RPS15AP12	0.0387228	0.0764071	0.053	0.039	1	2	RPS15AP12
ARL6IP1P3	0.0387253	-0.0693672	0.039	0.055	1	2	ARL6IP1P3
PYGB	0.0387588	-0.087886	0.142	0.167	1	2	PYGB
GGH	0.0387713	-0.0541466	0.118	0.144	1	2	GGH
PIP4K2C	0.0388686	0.07206	0.066	0.05	1	2	PIP4K2C
MINDY2	0.0391166	-0.0725723	0.049	0.066	1	2	MINDY2
NANS	0.0391653	0.0527902	0.109	0.089	1	2	NANS
PPIAP31	0.0391718	-0.0580901	0.063	0.081	1	2	PPIAP31
PHLDA3	0.0392086	0.0609814	0.103	0.082	1	2	PHLDA3
SVIL-AS1	0.0392579	-0.0657042	0.017	0.029	1	2	SVIL-AS1
ECD	0.0394385	-0.0546804	0.027	0.041	1	2	ECD
FTH1P3	0.0394468	0.106972	0.477	0.459	1	2	FTH1P3
USP22	0.0396173	-0.0723233	0.246	0.28	1	2	USP22
DUS4L	0.0398107	0.0863344	0.064	0.049	1	2	DUS4L
CD63	0.0398328	-0.0925451	0.75	0.758	1	2	CD63
STOML2	0.0400059	0.099749	0.253	0.228	1	2	STOML2
GSK3B	0.0400974	0.0759865	0.104	0.084	1	2	GSK3B
NTPCR	0.0401546	-0.0683739	0.119	0.144	1	2	NTPCR
KIAA1328	0.040165	-0.0569923	0.014	0.025	1	2	KIAA1328
CYTOR	0.0403416	-0.0752273	0.08	0.102	1	2	CYTOR
FLOT1	0.040411	0.116692	0.37	0.352	1	2	FLOT1
DRG1	0.0404955	-0.0632447	0.087	0.109	1	2	DRG1
RPL26L1	0.0404977	-0.0837663	0.19	0.219	1	2	RPL26L1
BIN1	0.0405546	0.109614	0.085	0.069	1	2	BIN1
RAB22A	0.0406672	-0.0543689	0.13	0.156	1	2	RAB22A
ATF4	0.0406936	0.0536471	0.509	0.478	1	2	ATF4
VILL	0.0407902	0.0513365	0.019	0.012	1	2	VILL
CAMSAP1	0.0407914	-0.0850336	0.047	0.063	1	2	CAMSAP1
RPL21P127	0.0409312	0.0500035	0.036	0.025	1	2	RPL21P127
MT1X	0.0409477	0.181343	0.541	0.546	1	2	MT1X
VBP1	0.0409644	-0.0777786	0.208	0.239	1	2	VBP1
TRIOBP	0.0410602	0.0999084	0.092	0.074	1	2	TRIOBP
SNX29	0.0411181	-0.0634825	0.035	0.05	1	2	SNX29
LAMA5	0.041201	0.164127	0.089	0.071	1	2	LAMA5
ATXN2	0.0412681	-0.119047	0.093	0.114	1	2	ATXN2
RNF24	0.0414188	0.110926	0.111	0.091	1	2	RNF24
NSG1	0.0415032	0.0610882	0.145	0.121	1	2	NSG1
SLIT1	0.0415266	0.060578	0.143	0.178	1	2	SLIT1
TTC1	0.0417101	-0.0801737	0.144	0.169	1	2	TTC1
METTL23	0.0417765	-0.0609251	0.108	0.133	1	2	METTL23
TUBB4B	0.0419661	0.156044	0.332	0.31	1	2	TUBB4B
VPS72	0.0419945	-0.11127	0.119	0.142	1	2	VPS72
PNISR	0.0420234	-0.113818	0.245	0.276	1	2	PNISR
NSL1	0.0421373	-0.0686148	0.104	0.127	1	2	NSL1
SCAP	0.0422574	-0.0725253	0.075	0.096	1	2	SCAP
MMP14	0.0422871	0.114067	0.158	0.135	1	2	MMP14
KDM5C	0.0423397	0.0556941	0.102	0.083	1	2	KDM5C
TRO	0.0423503	-0.0665197	0.08	0.102	1	2	TRO
NDRG2	0.042366	-0.199214	0.209	0.236	1	2	NDRG2
ECT2	0.0425562	0.0505805	0.091	0.073	1	2	ECT2
NOP53	0.0425744	-0.0958343	0.17	0.199	1	2	NOP53
PPP2R5D	0.0426282	0.0709554	0.094	0.076	1	2	PPP2R5D
AKT2	0.0427444	-0.0545231	0.11	0.134	1	2	AKT2
LINC00643	0.0427637	-0.0877982	0.016	0.027	1	2	LINC00643
SOX5	0.0428427	-0.0530832	0.039	0.055	1	2	SOX5
DYNC2LI1	0.0431347	-0.087327	0.056	0.074	1	2	DYNC2LI1
RPL26P6	0.0434078	0.0805265	0.393	0.378	1	2	RPL26P6
CEP170	0.0434355	-0.0699594	0.129	0.154	1	2	CEP170
ZNF155	0.0434384	0.0626355	0.024	0.015	1	2	ZNF155
FGFR3	0.0435814	-0.051599	0.068	0.088	1	2	FGFR3
GPSM2	0.043626	-0.0637439	0.074	0.094	1	2	GPSM2
RALY	0.0436957	-0.0939997	0.28	0.315	1	2	RALY
N4BP2	0.0437507	-0.0521099	0.041	0.057	1	2	N4BP2
CDC42EP3	0.0439303	-0.122179	0.074	0.093	1	2	CDC42EP3
USP47	0.0439381	-0.153214	0.129	0.151	1	2	USP47
PRPF4	0.044099	0.0694157	0.081	0.065	1	2	PRPF4
EMC8	0.0441395	-0.0593632	0.108	0.134	1	2	EMC8
CRK	0.0443028	-0.112675	0.147	0.172	1	2	CRK
SERP1	0.0444232	-0.134776	0.285	0.314	1	2	SERP1
PDIK1L	0.0444655	-0.064596	0.027	0.04	1	2	PDIK1L
SIRT2	0.0445307	0.371446	0.252	0.231	1	2	SIRT2
2010-09-01	0.0445694	0.0775624	0.077	0.061	1	2	2010-09-01
CSTF2T	0.0446607	0.0719617	0.057	0.044	1	2	CSTF2T
DHX9	0.0447152	-0.111552	0.208	0.237	1	2	DHX9
C6orf89	0.0447861	0.0639025	0.148	0.125	1	2	C6orf89
URGCP	0.04488	0.0584919	0.087	0.069	1	2	URGCP
CDK11B	0.0449105	-0.107742	0.159	0.186	1	2	CDK11B
COA6	0.0449202	-0.0819256	0.103	0.126	1	2	COA6
ATP10D	0.0449534	-0.0574196	0.025	0.038	1	2	ATP10D
GAPDHP71	0.0450808	-0.058024	0.016	0.027	1	2	GAPDHP71
POLR3E	0.0450869	-0.0568132	0.055	0.073	1	2	POLR3E
TUB	0.0451344	-0.057385	0.038	0.053	1	2	TUB
CLDN5	0.0452502	-0.0823239	0.009	0.017	1	2	CLDN5
ZNF680	0.0453405	-0.0669052	0.074	0.093	1	2	ZNF680
MEX3D	0.0456119	0.0575091	0.094	0.076	1	2	MEX3D
COX20	0.0456158	-0.110243	0.331	0.366	1	2	COX20
QSOX2	0.0456889	-0.0548656	0.031	0.046	1	2	QSOX2
NDUFAB1	0.0458206	-0.0706897	0.369	0.406	1	2	NDUFAB1
CDC14B	0.0459154	-0.0695818	0.047	0.063	1	2	CDC14B
RPL17P50	0.046241	0.0611951	0.073	0.057	1	2	RPL17P50
ZNF439	0.0462582	-0.0523971	0.025	0.038	1	2	ZNF439
BABAM1	0.0462959	0.0843505	0.177	0.155	1	2	BABAM1
EIF4G1	0.0463167	0.0738872	0.275	0.248	1	2	EIF4G1
POFUT2	0.0464726	0.0653751	0.082	0.065	1	2	POFUT2
TIMP4	0.046554	0.0731005	0.123	0.103	1	2	TIMP4
ZNF365	0.0466414	0.0672015	0.025	0.016	1	2	ZNF365
METTL26	0.0468819	-0.0529916	0.214	0.251	1	2	METTL26
PPIAP65	0.0471346	-0.064137	0.084	0.105	1	2	PPIAP65
WDR13	0.0472035	0.064718	0.152	0.129	1	2	WDR13
ZNF316	0.0473509	-0.0967287	0.058	0.076	1	2	ZNF316
LINC02210	0.0474149	0.0980535	0.061	0.047	1	2	LINC02210
ZFP36L1	0.0478232	0.190997	0.335	0.315	1	2	ZFP36L1
CA2	0.0478412	-0.257448	0.095	0.115	1	2	CA2
SMIM14	0.0479465	0.0986964	0.121	0.101	1	2	SMIM14
SRCIN1	0.0479748	0.116738	0.041	0.03	1	2	SRCIN1
NOTCH1	0.0479948	-0.134347	0.08	0.1	1	2	NOTCH1
SRP14-AS1	0.0480299	-0.0687537	0.014	0.024	1	2	SRP14-AS1
ZNF677	0.0481355	0.051419	0.08	0.063	1	2	ZNF677
SEC62	0.0482059	-0.0668804	0.413	0.452	1	2	SEC62
CPSF7	0.048295	-0.052944	0.109	0.132	1	2	CPSF7
RAB8A	0.0483596	0.0649071	0.104	0.085	1	2	RAB8A
RBFOX2	0.0484077	-0.0543503	0.135	0.161	1	2	RBFOX2
SEMA4D	0.0484823	0.173933	0.053	0.04	1	2	SEMA4D
G6PC3	0.0489919	-0.0617699	0.142	0.167	1	2	G6PC3
OSTC	0.0490288	-0.102714	0.169	0.193	1	2	OSTC
FCGRT	0.0490597	0.0522521	0.185	0.16	1	2	FCGRT
RRAGC	0.0490938	0.0545429	0.088	0.07	1	2	RRAGC
ORC6	0.0491467	0.0586178	0.07	0.055	1	2	ORC6
PXDC1	0.0492346	-0.0562958	0.107	0.13	1	2	PXDC1
PGPEP1	0.0494561	-0.0510414	0.054	0.071	1	2	PGPEP1
SPHK2	0.0495229	0.0628872	0.071	0.056	1	2	SPHK2
DAXX	0.0496107	0.0655326	0.144	0.122	1	2	DAXX
TMEM106C	0.0497305	-0.135979	0.139	0.163	1	2	TMEM106C
PPP6R2	0.0497467	-0.0595849	0.073	0.092	1	2	PPP6R2
CCER2	0.0498072	-0.0649912	0.021	0.032	1	2	CCER2
ECSIT	0.0498309	-0.07104	0.092	0.113	1	2	ECSIT
LRP8	0.0498617	-0.0675181	0.053	0.071	1	2	LRP8
JMJD4	0.0500443	0.0686065	0.055	0.042	1	2	JMJD4
ETS1	0.0500552	0.0577896	0.09	0.073	1	2	ETS1
MED10	0.0500644	0.119807	0.173	0.152	1	2	MED10
SELENON	0.0501239	0.0652349	0.132	0.111	1	2	SELENON
BRWD3	0.0502506	-0.0720532	0.018	0.029	1	2	BRWD3
B4GALNT4	0.0502705	-0.0519661	0.084	0.106	1	2	B4GALNT4
DDX31	0.05034	0.0550791	0.038	0.027	1	2	DDX31
RPN2	0.0503499	-0.0860857	0.339	0.377	1	2	RPN2
ZMYM5	0.0507718	-0.0609083	0.037	0.051	1	2	ZMYM5
CAMLG	0.0508803	-0.0693112	0.209	0.24	1	2	CAMLG
ZIM2-AS1	0.050885	-0.0636127	0.018	0.03	1	2	ZIM2-AS1
PHKA1	0.0509143	-0.0568138	0.027	0.04	1	2	PHKA1
FCHSD2	0.0509923	-0.0548604	0.061	0.078	1	2	FCHSD2
KLHL5	0.0510261	-0.0761781	0.07	0.09	1	2	KLHL5
UBXN2B	0.051181	-0.0829183	0.077	0.096	1	2	UBXN2B
ATP6V1A	0.0511967	-0.0809332	0.117	0.139	1	2	ATP6V1A
CBFB	0.0512245	-0.0592414	0.147	0.173	1	2	CBFB
LINC00511	0.0514484	0.0933669	0.076	0.06	1	2	LINC00511
RNF130	0.0514605	0.0634096	0.203	0.179	1	2	RNF130
RPL23P8	0.0515664	0.12089	0.182	0.16	1	2	RPL23P8
MT1G	0.0516156	0.0797015	0.33	0.313	1	2	MT1G
AGTRAP	0.0516448	0.0553814	0.12	0.1	1	2	AGTRAP
PPP1R2	0.0516612	0.0778243	0.143	0.121	1	2	PPP1R2
GRIK3	0.0516618	-0.0664044	0.09	0.112	1	2	GRIK3
OMA1	0.0517053	-0.0669573	0.021	0.032	1	2	OMA1
SMARCC2	0.0517747	-0.103913	0.11	0.131	1	2	SMARCC2
SAMM50	0.0518727	-0.0517122	0.088	0.109	1	2	SAMM50
SHC3	0.0518833	-0.0526267	0.036	0.05	1	2	SHC3
NRXN3	0.0520266	0.0625984	0.023	0.015	1	2	NRXN3
ACBD3	0.0521584	-0.0522209	0.102	0.123	1	2	ACBD3
RPL39P5	0.0521742	0.0624706	0.098	0.081	1	2	RPL39P5
SIK3	0.0522866	-0.0740583	0.044	0.06	1	2	SIK3
OXA1L	0.0523319	0.0838811	0.147	0.126	1	2	OXA1L
AP4E1	0.0526872	0.054127	0.032	0.022	1	2	AP4E1
RPS3AP44	0.0527131	0.0817678	0.197	0.174	1	2	RPS3AP44
TMEM100	0.0528376	-0.0575268	0.055	0.073	1	2	TMEM100
RPL14P3	0.0528751	-0.0791227	0.077	0.096	1	2	RPL14P3
SLC22A17	0.0530195	-0.0574884	0.218	0.251	1	2	SLC22A17
ST8SIA1	0.0530243	-0.0647464	0.038	0.052	1	2	ST8SIA1
DXO	0.0531028	-0.0502382	0.025	0.037	1	2	DXO
TRIB3	0.0532026	-0.0507422	0.061	0.08	1	2	TRIB3
PRKAG1	0.0532194	0.109763	0.127	0.106	1	2	PRKAG1
SCRN1	0.0535005	-0.0642601	0.234	0.266	1	2	SCRN1
MT1E	0.0535807	0.118813	0.294	0.27	1	2	MT1E
GPN2	0.0536447	-0.0612165	0.038	0.053	1	2	GPN2
GIHCG	0.0536689	-0.0858211	0.301	0.272	1	2	GIHCG
FZD3	0.0536781	-0.0839227	0.13	0.153	1	2	FZD3
COX6CP1	0.0537238	-0.0825348	0.223	0.254	1	2	COX6CP1
YPEL3	0.0538809	-0.0721009	0.124	0.147	1	2	YPEL3
CLTB	0.053896	-0.0891147	0.222	0.252	1	2	CLTB
MCM6	0.0540239	0.0558442	0.114	0.095	1	2	MCM6
PRAF2	0.0541122	0.0560476	0.301	0.274	1	2	PRAF2
ZNF2	0.0542254	0.0594114	0.027	0.018	1	2	ZNF2
ESF1	0.0543521	-0.102715	0.123	0.146	1	2	ESF1
PANK4	0.0545144	-0.0576436	0.041	0.056	1	2	PANK4
CRIM1	0.0545506	-0.0668402	0.062	0.079	1	2	CRIM1
ADAMTS1	0.0545699	0.0796937	0.073	0.057	1	2	ADAMTS1
PIAS4	0.0547671	-0.0709863	0.053	0.069	1	2	PIAS4
BST2	0.0547808	0.0974441	0.218	0.192	1	2	BST2
C8orf59	0.0548242	0.0823271	0.303	0.279	1	2	C8orf59
FCER1G	0.0550443	-0.0606107	0.024	0.015	1	2	FCER1G
RIOK3	0.0551383	0.145798	0.13	0.111	1	2	RIOK3
NAV2	0.055142	0.111544	0.117	0.098	1	2	NAV2
PPP2R5A	0.055178	-0.053675	0.043	0.058	1	2	PPP2R5A
RBM4B	0.055236	-0.0563705	0.065	0.083	1	2	RBM4B
AHCY	0.0553158	-0.0989485	0.119	0.141	1	2	AHCY
CCNG1	0.055334	0.0711937	0.076	0.06	1	2	CCNG1
ASPM	0.0555319	0.142352	0.055	0.043	1	2	ASPM
MAN2A1	0.0556413	0.0589625	0.07	0.055	1	2	MAN2A1
CKAP2L	0.0556642	0.0500666	0.041	0.03	1	2	CKAP2L
MEA1	0.0556907	-0.0685922	0.279	0.314	1	2	MEA1
CLPTM1L	0.0557514	-0.0676666	0.201	0.231	1	2	CLPTM1L
LETM1	0.0560343	-0.0799271	0.096	0.117	1	2	LETM1
WDR11	0.056156	-0.0870729	0.036	0.049	1	2	WDR11
GART	0.0562506	-0.115738	0.1	0.118	1	2	GART
SERINC1	0.056265	0.112277	0.306	0.286	1	2	SERINC1
EID1	0.0564263	-0.0826603	0.433	0.472	1	2	EID1
SGPL1	0.056437	-0.0949198	0.061	0.077	1	2	SGPL1
PARD6A	0.0565722	-0.0531803	0.028	0.041	1	2	PARD6A
PRR34-AS1	0.0568462	-0.0899119	0.037	0.051	1	2	PRR34-AS1
NFYC	0.0569574	-0.0766935	0.075	0.093	1	2	NFYC
TOX3	0.0571679	-0.0806377	0.028	0.041	1	2	TOX3
POLD1	0.0571781	0.0602805	0.032	0.023	1	2	POLD1
LENG1	0.057304	-0.0603115	0.058	0.075	1	2	LENG1
PSMD9	0.0573138	0.0534366	0.135	0.115	1	2	PSMD9
P4HA1	0.0574387	0.0769208	0.117	0.098	1	2	P4HA1
CMC2	0.0575479	-0.0581791	0.215	0.246	1	2	CMC2
RFK	0.0576834	0.0788231	0.098	0.081	1	2	RFK
ARAP3	0.0576878	-0.085875	0.032	0.045	1	2	ARAP3
USP33	0.0577156	-0.0773187	0.091	0.111	1	2	USP33
RPL13AP25	0.0578004	0.0724663	0.396	0.382	1	2	RPL13AP25
ALKBH1	0.0578101	-0.0527611	0.013	0.022	1	2	ALKBH1
FRMD6	0.0578408	0.0668802	0.047	0.035	1	2	FRMD6
RPL10P1	0.0578756	-0.0857379	0.06	0.076	1	2	RPL10P1
RPS27AP2	0.0579161	-0.0658006	0.113	0.137	1	2	RPS27AP2
IPMK	0.0580289	-0.0519748	0.01	0.018	1	2	IPMK
RNF121	0.0580661	0.0771709	0.055	0.042	1	2	RNF121
SNX27	0.0580911	-0.0579069	0.116	0.138	1	2	SNX27
MCM2	0.0580962	-0.111672	0.073	0.091	1	2	MCM2
MCC	0.0582051	-0.068321	0.071	0.09	1	2	MCC
GLCCI1	0.058411	-0.0815669	0.109	0.132	1	2	GLCCI1
MGAT5	0.0584291	-0.0550047	0.039	0.053	1	2	MGAT5
HACD2	0.058491	-0.0613372	0.065	0.083	1	2	HACD2
BTF3	0.0585023	-0.0712483	0.601	0.632	1	2	BTF3
CLEC11A	0.0586675	-0.0568806	0.063	0.08	1	2	CLEC11A
GGNBP2	0.0588594	-0.0912063	0.107	0.127	1	2	GGNBP2
PCNX2	0.0590595	-0.05068	0.039	0.054	1	2	PCNX2
SNU13	0.0590971	-0.0655698	0.344	0.383	1	2	SNU13
SNHG16	0.0591336	-0.0951544	0.135	0.16	1	2	SNHG16
DRG2	0.0592354	0.0593046	0.082	0.066	1	2	DRG2
ZNF621	0.0593096	0.0993249	0.096	0.08	1	2	ZNF621
GHDC	0.0597791	-0.0629406	0.023	0.034	1	2	GHDC
FKRP	0.0598064	-0.0552639	0.028	0.041	1	2	FKRP
TENM2	0.0598169	0.0572137	0.014	0.008	1	2	TENM2
SECISBP2	0.0601995	-0.0769129	0.075	0.093	1	2	SECISBP2
MDK	0.0602137	-0.0695268	0.429	0.46	1	2	MDK
VDAC3	0.0603439	-0.051543	0.189	0.22	1	2	VDAC3
LSM5	0.0604232	-0.100448	0.365	0.391	1	2	LSM5
ATXN2L	0.0604255	0.188634	0.234	0.211	1	2	ATXN2L
SSPN	0.0605014	-0.082469	0.081	0.099	1	2	SSPN
TBC1D5	0.060616	-0.0600427	0.189	0.221	1	2	TBC1D5
RPSAP12	0.0606958	-0.0761086	0.321	0.357	1	2	RPSAP12
NEK1	0.0607305	-0.0832213	0.048	0.063	1	2	NEK1
MEIS2	0.0607479	-0.0832218	0.057	0.074	1	2	MEIS2
AKT3	0.0609243	-0.062098	0.077	0.096	1	2	AKT3
FAAP100	0.060962	-0.0660163	0.043	0.058	1	2	FAAP100
ARHGEF12	0.0611715	-0.0660906	0.091	0.11	1	2	ARHGEF12
SKP1P1	0.061227	-0.0718088	0.187	0.217	1	2	SKP1P1
SCCPDH	0.061414	-0.125795	0.183	0.207	1	2	SCCPDH
TACC2	0.0617819	-0.0595807	0.051	0.067	1	2	TACC2
PCED1A	0.0618	-0.0604404	0.064	0.081	1	2	PCED1A
OSBPL5	0.0618807	-0.0596392	0.028	0.041	1	2	OSBPL5
CHD7	0.061895	-0.148657	0.133	0.156	1	2	CHD7
NEO1	0.0619035	-0.050558	0.066	0.084	1	2	NEO1
TNPO3	0.0619649	0.0548478	0.155	0.134	1	2	TNPO3
[truncated: 5,479 more rows]
