# Supplementary material for: Intermediate filaments promote glioblastoma cell invasion by controlling cell deformability and mechanosensitive gene expression
Source: Research Square preprint supplement (doi:10.21203/rs.3.rs-2828066/v1), 2023-06-29
Supplement: Supplementary file 4 [file c7bf3c4ff284a91c4aaadbb9.xlsx]

## Sheet: Supp Table 3
row	GO.ID	Term	Annotated	Significant	Expected	elimFisher	sig.genes.in.term	padj	FoldE	cluster	pos/neg
2	GO:0007568	aging	84	27	20.81	4.3e-14	DCN TIMP2 CTNNA1 TIMP1 CDK6 NAMPT CRYAB SLC1A2 SOD2 BCL6 IGFBP2 NFE2L2 LRP1 CDKN1A CANX JUND AGT EDNRB APP LMNA FOS PRNP DAG1 JUN COX1 ND4 ATP6	2.13753e-10	1.29745	12	neg
2	GO:0001525	angiogenesis	126	21	6.93	9.6e-06	TNFRSF12A XBP1 PGK1 VEGFA FN1 EPAS1 NFE2L2 PIK3CA NR4A1 RRAS AAMP SAT1 RHOB ADM ITGB1 EPHB1 SPRED1 ANXA2 PLCD1 EMP2 ANXA2P2	0.0477216	3.0303	5	pos
3	GO:0002576	platelet degranulation	42	17	8.14	4e-12	LAMP2 ACTN1 TIMP3 TIMP1 SERPINE1 LGALS3BP VEGFA SPARC FN1 CLU SERPING1 ALDOA TAGLN2 ANXA5 A2M FLNA SELENOP	1.7544e-08	2.08845	1	pos
4	GO:0071276	cellular response to cadmium ion	13	10	2.52	2.2e-11	MT3 MT1G MT2A GSN MT1E FOS JUN MT1X MT1F MT1M	9.6492e-08	3.96825	1	pos
25	GO:0001525	angiogenesis	126	26	19.57	7.6e-06	NRCAM ITGB8 HSPB1 CCL2 SPARC THBS4 FGF1 NFE2L2 F3 C3 ID1 SAT1 RAMP1 CHI3L1 ANXA1 AGT SPRY2 CYR61 DDAH1 MMP14 PLCD3 EFNA1 CLIC4 JUN ANXA2 ANXA2P2	0.0377796	1.32856	10	pos
22	GO:0001525	angiogenesis	111	26	21.51	8.1e-07	TNFRSF12A SEMA6A HIF1A ITGB8 HSPB1 SERPINE1 CCL2 VEGFA SPARC FN1 EPAS1 F3 C3 SAT1 RAMP1 CHI3L1 ANXA1 AGT CYR61 MMP14 SHC1 STAT3 CLIC4 JUN ANXA2 ANXA2P2	0.00355266	1.20874	1	pos
7	GO:0030449	regulation of complement activation	9	8	1.74	3.1e-10	CD59 CD81 CLU C3 SERPING1 C1R A2M C1S	1.35966e-06	4.5977	1	pos
6	GO:0007155	cell adhesion	349	45	43.83	9.1e-07	EPDR1 TRIP6 CCDC80 SEMA6A JAG1 SRPX CDK6 ITGB8 PTN HSPB1 LGALS3BP PRKAR1A CDH6 TNFAIP6 PREX1 MACF1 KIAA0754 ATP1B2 ACTN4 POSTN CLDN10 CD63 ITGA7 COL6A1 APP TNFRSF21 EGFR CLDN12 LOC102723899 MMP14 ZYX AZGP1 DDR2 SMAD3 LAMB2 DAG1 CD151 PTPN11 ADGRB1 EMILIN3 PARVB IL1RAP NLGN3 COL28A1 HLA-E CDH4 ADAM9	0.00452361	1.02669	3	pos
1	GO:0051301	cell division	173	44	30.34	1.9e-20	TACC3 SIRT2 KLHL42 TPX2 BIRC5 ORC6 UBE2S CCND1 ECT2 CDC20 STMN1 CENPF CCND2 ZWINT TUBA1B CKS2 PIMREG TOP2A RAN CDCA8 CDK4 CKAP2 NUSAP1 KIF2C NUF2 NCAPG2 BUB3 BUB1B CALM3 RACGAP1 CLASP2 MAD2L1 PTTG1 RAD21 CENPV TUBA1A CDK1 UBE2C AURKB RCC2 SKA2 TUBB CENPW KIFC1	9.4449e-17	1.45023	9	pos
10	GO:0006882	cellular zinc ion homeostasis	11	8	2.13	5.3e-09	MT3 SLC39A14 MT1G MT2A MT1E MT1X MT1F MT1M	2.32458e-05	3.75587	1	pos
11	GO:0007165	signal transduction	927	141	179.6	7.8e-09	TNFRSF12A LTF WWTR1 CD74 CD44 GPC1 KLF6 TNFRSF1A FERMT2 CD59 PPP1R15A TRIP6 MT3 SEMA6A SORBS1 GADD45B LGALS1 TIMP3 HIF1A NFKBIA SRPX TIMP1 NAMPT ITGB8 HSPB1 SERPINE1 RASSF4 RASD1 LGALS3BP CCL2 CPE CRYAB CD81 NEDD9 SOD2 VEGFA ARRDC3 BCL6 EFEMP1 FN1 EPAS1 GADD45A WLS GBP1 F3 SPP1 DUSP1 EGR1 CLU MT2A SOX9 C3 APOE PPFIA1 LGALS3 RAMP1 CHI3L1 POSTN CHL1 DTNA ANXA1 ITGA7 AGT ITM2C SDCBP RDX IQGAP1 IFITM…	3.42108e-05	0.785078	1	pos
12	GO:0050729	positive regulation of inflammatory resp...	20	10	3.87	1e-08	TNFRSF1A NFKBIA SERPINE1 C3 AGT NFKBIZ OSMR GPRC5B LPL CD47	4.386e-05	2.58398	1	pos
13	GO:0045926	negative regulation of growth	67	16	12.98	1.3e-08	MT3 SEMA6A HIF1A CRYAB BCL6 SPP1 MT1G MT2A AGT GJA1 SQSTM1 MT1E MT1X MT1F MT1M HSPA1A	5.7018e-05	1.23267	1	pos
14	GO:0071347	cellular response to interleukin-1	23	11	4.46	1.4e-08	HIF1A NFKBIA CCL2 GBP1 EGR1 SOX9 CHI3L1 SQSTM1 GBP2 CEBPB CD47	6.1404e-05	2.46637	1	pos
15	GO:0008360	regulation of cell shape	38	13	7.36	1.7e-08	FERMT2 CCL2 VEGFA FN1 ANXA1 ITGA7 RDX MSN ALDOA RHOC PDPN DLC1 S100A13	7.4562e-05	1.7663	1	pos
16	GO:0071294	cellular response to zinc ion	9	7	1.74	2.5e-08	MT3 MT1G MT2A MT1E MT1X MT1F MT1M	0.00010965	4.02299	1	pos
17	GO:0010951	negative regulation of endopeptidase act...	49	17	9.49	3.4e-08	LTF CD44 MT3 TIMP3 CST3 TIMP1 SERPINE1 SPOCK2 CRYAB VEGFA SERPINB6 C3 AGT SERPING1 CSTB IFI16 A2M	0.000149124	1.79136	1	pos
18	GO:0010273	detoxification of copper ion	10	7	1.94	7.8e-08	MT3 MT1G MT2A MT1E MT1X MT1F MT1M	0.000342108	3.60825	1	pos
19	GO:0043687	post-translational protein modification	92	19	17.82	8.9e-08	TNC LGALS1 HIF1A CST3 TIMP1 FN1 EPAS1 SPP1 C3 APOE CYR61 RAB13 SPARCL1 FBXO32 IGFBP7 LAMB2 CSF1 SOCS3 FAM20C	0.000390354	1.06622	1	pos
16	GO:0098609	cell-cell adhesion	182	32	28.27	1.7e-06	CD74 CD44 CTNNA1 NRCAM EZR HSPB1 CCL2 THBS4 CNN3 SLITRK3 SOX9 IL6ST ANXA1 ITGA7 CD164 RDX CYR61 ITPKB NFKBIZ EGFR SLC7A11 SPARCL1 PDPN VCAM1 CTNND2 PRNP CEBPB ANXA2 ZFP36L1 HLA-E HLA-DPA1 TTYH1	0.0084507	1.13194	10	pos
21	GO:0002698	negative regulation of immune effector p...	23	9	4.46	3.7e-07	CD59 BCL6 LGALS3 ANXA1 SERPING1 HTRA1 A2M CD47 HLA-E	0.00162282	2.01794	1	pos
25	GO:0098609	cell-cell adhesion	152	31	29.45	1.5e-06	CD74 CD44 VMP1 LGALS1 MYL12A HSPB1 CCL2 BCL6 CNN3 SOX9 LGALS3 ANXA1 ITGA7 RDX CYR61 NFKBIZ MSN SPARCL1 JAM2 SHC1 PLPP3 PDPN S100A11 CEBPB ANXA2 ZFP36L1 CD47 FLNA HLA-E CLIC1 ADAM9	0.006579	1.05263	1	pos
23	GO:0051591	response to cAMP	23	8	4.46	9.7e-07	SPARC DUSP1 FOSB JUND FOS JUNB JUN ZFP36L1	0.00425442	1.79372	1	pos
24	GO:0048146	positive regulation of fibroblast prolif...	18	8	3.49	1e-06	CD74 FOSL2 FN1 AGT JUN ANXA2 S100A6 ANXA2P2	0.004386	2.29226	1	pos
1	GO:0032870	cellular response to hormone stimulus	130	29	25.19	1.3e-13	TNC MT3 SORBS1 SPP1 DUSP1 FOSB JUND RAMP1 ANXA1 AGT RDX RAB13 MSN LYPD1 ZFP36L2 FBXO32 SHC1 ATP1A1 IGFBP7 ANXA5 CTSB FAM107A STAT3 AHCYL1 FOS JUNB JUN SOCS3 ZFP36L1	5.7018e-10	1.15125	1	pos
26	GO:0006958	complement activation, classical pathway	6	5	1.16	1.8e-06	CLU C3 SERPING1 C1R C1S	0.0078948	4.31034	1	pos
27	GO:0002548	monocyte chemotaxis	6	5	1.16	1.8e-06	SERPINE1 CCL2 DUSP1 LGALS3 ANXA1	0.0078948	4.31034	1	pos
28	GO:0071280	cellular response to copper ion	14	7	2.71	1.9e-06	MT3 MT1G MT2A MT1E MT1X MT1F MT1M	0.0083334	2.58303	1	pos
11	GO:0019221	cytokine-mediated signaling pathway	220	22	18.55	6.4e-06	TNFRSF12A NOS2 MT3 TIMP1 VEGFA FN1 CDKN1A MT2A BST2 GSTO1 SQSTM1 ANXA2 CIB1 CARD16 RACK1 HLA-B HLA-C CEBPD PSMB8 HLA-A B2M MIF	0.0318144	1.18598	8	pos
30	GO:0072659	protein localization to plasma membrane	53	16	10.27	3.4e-06	TNFRSF1A SORBS1 GBP1 PPFIA1 LGALS3 RAMP1 RDX RAB13 LYPD1 MMP14 SQSTM1 VAMP5 ANXA2 FLNA S100A10 ANXA2P2	0.0149124	1.55794	1	pos
31	GO:0045087	innate immune response	207	36	40.1	4.6e-06	LTF CD44 NFKBIA CCL2 GBP1 EGR1 CLU MT2A C3 LGALS3 ANXA1 IFITM3 GSN SERPING1 C1R GBP2 IFI16 PTX3 SCARA3 AQP4 SAA1 A2M C1S CSF1 SOCS3 IFITM2 HLA-DRB1 CD47 PJA2 HLA-DRA HLA-B HLA-C HLA-E HLA-A HSPA1A B2M	0.0201756	0.897756	1	pos
32	GO:0070371	ERK1 and ERK2 cascade	58	19	11.24	5.1e-06	CD74 CD44 MT3 SEMA6A TIMP3 CCL2 FN1 GBP1 DUSP1 SOX9 CHI3L1 AGT CYR61 NTRK2 ZFP36L2 SHC1 ATF3 JUN ZFP36L1	0.0223686	1.69039	1	pos
33	GO:0043123	positive regulation of I-kappaB kinase/N...	35	10	6.78	5.2e-06	LTF CD74 TNFRSF1A LGALS1 WLS GJA1 RHOC GPRC5B S100A13 FLNA	0.0228072	1.47493	1	pos
34	GO:0022617	extracellular matrix disassembly	22	7	4.26	5.8e-06	CD44 CST3 TIMP1 MMP14 PDPN HTRA1 A2M	0.0254388	1.64319	1	pos
6	GO:0019221	cytokine-mediated signaling pathway	196	43	37.97	1.8e-10	TNFRSF12A CD74 CD44 KLF6 TNFRSF1A MT3 HIF1A NFKBIA TIMP1 CCL2 SOD2 VEGFA BCL6 FN1 GBP1 F3 EGR1 MT2A ANXA1 IFITM3 MCL1 OSMR MSN SHC1 SQSTM1 GBP2 STAT3 FOS JUNB SAA1 ANXA2 CSF1 SOCS3 IFITM2 HLA-DRB1 HLA-DRA HLA-B HLA-C CEBPD HLA-E HLA-A HSPA1A B2M	7.8948e-07	1.13247	1	pos
35	GO:0006953	acute-phase response	7	5	1.36	5.9e-06	FN1 APOL2 STAT3 CEBPB SAA1	0.0258774	3.67647	1	pos
37	GO:0071407	cellular response to organic cyclic comp...	95	17	18.41	6.3e-06	TNC LGALS1 CCL2 ID3 SPP1 EGR1 CLU ANXA1 MSN ZFP36L2 FBXO32 ATP1A1 TIPARP FAM107A STAT3 CEBPB ZFP36L1	0.0276318	0.923411	1	pos
38	GO:0010469	regulation of signaling receptor activit...	61	13	11.82	7.2e-06	TIMP1 NAMPT SERPINE1 CCL2 VEGFA EFEMP1 SPP1 AGT CXCL14 LYPD1 SHC1 CSF1 NMB	0.0315792	1.09983	1	pos
39	GO:0043524	negative regulation of neuron apoptotic ...	29	9	5.62	7.3e-06	MT3 HIF1A CCL2 SOD2 APOE CHL1 NTRK2 CEBPB JUN	0.0320178	1.60142	1	pos
40	GO:0042493	response to drug	175	31	33.9	8.8e-06	MGST1 TNC SLC1A3 MT3 LGALS1 NFKBIA CRYAB SPARC DUSP1 EGR1 MT2A SOX9 FOSB JUND ANXA1 AGT PAM GSN LYPD1 FBXO32 PEA15 ATP1A1 IGFBP7 NNMT STAT3 FOS JUNB LPL JUN B2M ADAM9	0.0385968	0.914454	1	pos
41	GO:0071277	cellular response to calcium ion	17	7	3.29	9.4e-06	FOSB JUND IQGAP1 CLIC4 FOS JUNB JUN	0.0412284	2.12766	1	pos
42	GO:0009612	response to mechanical stimulus	52	17	10.07	1.1e-05	TNC TNFRSF1A SLC1A3 NFKBIA GADD45A SOX9 FOSB JUND CHI3L1 POSTN AGT BAG3 MMP14 ATP1A1 FOS JUNB JUN	0.048246	1.68818	1	pos
1	GO:0032392	DNA geometric change	15	6	2	5.4e-07	HMGB3 HNRNPA2B1 TOP2A HMGB2 MCM7 HMGB1	0.00236844	3	1	neg
2	GO:0051301	cell division	127	17	16.94	2.2e-06	YBX1 BIRC5 SEPT3 UBE2S MAD2L2 STMN1 TUBA1B TOP2A RAN CDK4 CCNG2 CALM3 CLASP2 CENPV TUBA1A RCC2 TUBB	0.0096492	1.00354	1	neg
29	GO:0030855	epithelial cell differentiation	115	31	22.28	2e-06	WWTR1 TNFRSF1A FOSL2 HIF1A SERPINE1 ALDOC VEGFA ID3 CNN3 SOX9 LGALS3 ANXA1 RDX IQGAP1 RAB13 MSN TAGLN2 PDPN BDH2 CTSB TPP1 CLIC4 LAMB2 CEBPB JUN ANXA2 ZFP36L1 FLNA ANXA2P2 FAM20C ADAM9	0.008772	1.39138	1	pos
8	GO:0030855	epithelial cell differentiation	144	37	35.67	1.2e-09	TNFRSF1A EZR HIF1A TJP1 CDK6 PTN ALDOC DNPH1 VEGFA HES1 ID3 CNN3 CDKN1A SOX9 LGALS3 ANXA1 TMOD1 IQGAP1 RAB13 MSN TAGLN2 CBR1 PDPN HEY1 CTSB TPP1 CLIC4 LAMB2 CEBPB JUN ANXA2 ZFP36L1 FLNA GSTK1 PSAP FAM20C ADAM9	5.9652e-06	1.03729	12	neg
1	GO:0002576	platelet degranulation	45	13	5.65	4e-09	APLP2 TIMP3 TIMP1 LGALS3BP SPARC ACTN4 CD63 APP TAGLN2 ANXA5 VEGFB PDGFA CALM1 CALM3	1.9884e-05	2.30088	3	pos
17	GO:0070371	ERK1 and ERK2 cascade	70	22	10.87	2.7e-06	CD74 CD44 FGFR3 EZR TIMP3 CCL2 GBP1 DUSP1 SOX9 CHI3L1 AGT SPRY2 APP CYR61 EGFR ZFP36L2 DDR2 ATF3 NDRG2 JUN ZFP36L1 DDR1	0.0134217	2.02392	10	pos
21	GO:0070371	ERK1 and ERK2 cascade	70	22	11.06	2.7e-06	CD74 CD44 FGFR3 SEMA6A EZR TIMP3 CCL2 GBP1 DUSP1 SOX9 CHI3L1 NOTCH2 AGT CYR61 NTRK2 NOTCH1 ZFP36L2 ATF3 NDRG2 JUN ZFP36L1 DDR1	0.0134217	1.98915	7	pos
4	GO:0007528	neuromuscular junction development	9	6	1.13	1.7e-07	PTN LRP4 APP LAMB2 COL4A1 ETV5	0.00084507	5.30973	3	pos
5	GO:0051592	response to calcium ion	40	10	5.02	3.7e-07	SPARC SYT11 CPNE2 EGFR HOMER1 ANXA5 S100A16 CALM1 CALM3 CYTB ADAM9	0.00183927	1.99203	3	pos
52	GO:0070371	ERK1 and ERK2 cascade	70	22	17.34	9.7e-06	CD44 MT3 EZR TIMP3 FN1 DUSP1 SOX9 CHI3L1 AGT SPRY2 APP CYR61 EGFR NTRK2 ZFP36L2 ATF3 NDRG2 JUN CIB1 ZFP36L1 PDGFA DDR1	0.0482187	1.26874	12	neg
7	GO:0010951	negative regulation of endopeptidase act...	56	11	7.03	9.8e-07	TFPI TIMP2 APLP2 MT3 TIMP3 CST3 XIAP TIMP1 BST2 APP COL28A1	0.00487158	1.56472	3	pos
8	GO:0001666	response to hypoxia	98	13	12.31	1.1e-06	NOS2 MMP2 MT3 PTN CHCHD2 ACTN4 POSTN MMP14 SMAD3 VEGFB CYTB ND5 ND4	0.0054681	1.05605	3	pos
9	GO:0038084	vascular endothelial growth factor signa...	8	5	1	3.2e-06	DCN SEMA6A HSPB1 CD63 VEGFB	0.0159072	5	3	pos
5	GO:0030198	extracellular matrix organization	78	31	15.11	3.3e-11	CD44 TNC TNFRSF1A PLOD1 CST3 TIMP1 ITGB8 SERPINE1 AEBP1 SPOCK2 SPARC FN1 SPP1 SOX9 POSTN ITGA7 AGT COL6A1 CYR61 JAM2 MMP14 PDPN PTX3 HTRA1 LAMB2 EFEMP2 A2M ANXA2 CD47 COL5A2 ANXA2P2	1.44738e-07	2.05162	1	pos
11	GO:0035987	endodermal cell differentiation	14	6	1.76	5.3e-06	MMP2 COL4A2 ITGA7 COL6A1 MMP14 COL5A2	0.0263463	3.40909	3	pos
12	GO:0014002	astrocyte development	9	5	1.13	7.1e-06	MT3 CDK6 APP EGFR LAMB2	0.0352941	4.42478	3	pos
2	GO:0030198	extracellular matrix organization	91	23	11.43	6.5e-09	DCN TIMP2 MMP2 CCDC80 CST3 TIMP1 ITGB8 PLOD3 SPARC POSTN COL4A2 ITGA7 COL6A1 APP MMP14 DDR2 SMAD3 LAMB2 DAG1 COL4A1 PDGFA COL5A2 COL28A1	3.23115e-05	2.01225	3	pos
14	GO:0071230	cellular response to amino acid stimulus	22	7	2.76	8.6e-06	MMP2 COL6A1 EGFR BCL2L1 COL4A1 LAMTOR4 COL5A2	0.0427506	2.53623	3	pos
1	GO:0048875	chemical homeostasis within a tissue	6	4	0.33	9.1e-06	HOMER2 VEGFA EPAS1 LPCAT1	0.0452361	12.1212	5	pos
28	GO:0030198	extracellular matrix organization	91	25	14.13	8.1e-06	CD44 TIMP2 TNC GPM6B ELN TNFRSF1A CCDC80 CST3 ITGB8 AEBP1 SPARC SOX9 ITGA7 AGT COL6A1 APP CYR61 MMP14 PDPN VCAM1 DDR2 HTRA1 ANXA2 DDR1 ANXA2P2	0.0402651	1.76929	10	pos
1	GO:0045926	negative regulation of growth	84	17	13.27	2.3e-10	FGFR3 SEMA6A CRYAB BCL6 MT1G PSRC1 NOTCH2 AGT NOTCH1 GJA1 SQSTM1 MT1E MT1X MT1F MT1A MT1M HSPA1A	1.14333e-06	1.28109	7	pos
2	GO:0045944	positive regulation of transcription by ...	247	36	39.03	1.4e-09	WWTR1 TNFRSF1A ARHGEF10L NFKBIA NAMPT WASL CD81 RFX4 HES1 NFE2L2 PRRX1 EGR1 EGR2 IRF1 SOX9 C1orf61 FOSB JUND BMPR1B CYR61 CSRNP1 NOTCH1 IER2 SQSTM1 ATF3 IFI16 HEY1 FOS JUNB ID4 JUN RGMA MAFF PLSCR1 SERTAD1 CEBPD	6.9594e-06	0.922367	7	pos
3	GO:0035914	skeletal muscle cell differentiation	16	9	2.53	3.8e-09	EGR1 EGR2 NOTCH1 BTG2 S100B ATF3 FOS NUPR1 MAFF	1.88898e-05	3.55731	7	pos
4	GO:0051591	response to cAMP	26	12	4.11	4e-09	EZR SPARC DUSP1 ITPR2 FOSB CDO1 JUND FOS JUNB JUN ZFP36L1 AQP1	1.9884e-05	2.91971	7	pos
13	GO:0030198	extracellular matrix organization	91	34	22.54	1.3e-08	DCN CD44 TIMP2 TNC GPM6B TNFRSF1A CCDC80 CST3 TIMP1 ITGB8 AEBP1 SPARC FN1 LRP1 SOX9 POSTN ITGA7 AGT COL6A1 APP CYR61 SERPINH1 PLOD2 JAM2 MMP14 PDPN HTRA1 LAMB2 EFEMP2 DAG1 A2M ANXA2 PDGFA DDR1	6.4623e-05	1.50843	12	neg
6	GO:0071280	cellular response to copper ion	14	8	2.21	2.5e-08	MT1G MT1E PRNP MT1X MT1F MT1A MT1M AQP1	0.000124275	3.61991	7	pos
7	GO:0007568	aging	84	17	13.27	3.3e-08	TIMP2 CTNNA1 NAMPT CRYAB SLC1A2 SOD2 BCL6 ID2 NFE2L2 JUND AGT EDNRB ADM SERPING1 FOS PRNP JUN	0.000164043	1.28109	7	pos
8	GO:0032496	response to lipopolysaccharide	57	13	9.01	4.5e-08	MGST1 MAOB NFKBIA CCL2 SPARC PLSCR4 JUND EDNRB NOTCH1 ADM FOS JUNB JUN	0.000223695	1.44284	7	pos
9	GO:0071276	cellular response to cadmium ion	16	8	2.53	9.9e-08	MT1G MT1E FOS JUN MT1X MT1F MT1A MT1M	0.000492129	3.16206	7	pos
10	GO:0032870	cellular response to hormone stimulus	169	25	26.71	2.4e-07	ATP1A2 TNC SORBS1 CA2 NFE2L2 DUSP1 FOSB JUND RAMP1 ANXA1 AGT RDX NOTCH1 ZFP36L2 IGFBP7 FAM107A RAB31 AHCYL1 FOS JUNB JUN SOCS3 ZFP36L1 IRS2 AQP1	0.00119304	0.935979	7	pos
11	GO:0000122	negative regulation of transcription by ...	200	29	31.6	2.6e-07	WWTR1 EZR AEBP1 ATN1 BCL6 HES1 ID2 PRRX1 ID3 EGR1 SOX9 FOSB ID1 JUND DNAJB1 EDNRB TMBIM6 NOTCH1 BTG2 SQSTM1 ATF3 IFI16 HEY1 JUNB CXXC5 ID4 JUN ZBTB20 HSPA1A	0.00129246	0.917722	7	pos
12	GO:0001570	vasculogenesis	18	8	2.84	3.1e-07	ITGB8 NTRK2 NOTCH1 ADM TIPARP HEY1 JUNB ZFP36L1	0.00154101	2.8169	7	pos
13	GO:0043392	negative regulation of DNA binding	22	8	3.48	3.4e-07	NFKBIA ID2 ID3 ID1 IFI16 HEY1 ID4 JUN	0.00169014	2.29885	7	pos
14	GO:0030449	regulation of complement activation	9	6	1.42	4.5e-07	CD81 CLU SERPING1 C1R A2M C1S	0.00223695	4.22535	7	pos
15	GO:0007275	multicellular organism development	1116	151	176.35	5.2e-07	MGST1 WWTR1 CD74 PLEKHB1 CD44 TIMP2 TNC CTNNA1 GPM6B ELN DKK3 TNFRSF1A FGFR3 MAOB ACTN1 ALDH3A2 ADCYAP1R1 SLC1A3 SEMA6A PHGDH EZR GADD45B NFKBIA CA2 ITGB8 LFNG WASL RARRES2 AEBP1 ZFAND5 CCL2 PMP22 CPE CRYAB SLC1A2 ATN1 RFX4 SOD2 QKI SPARC BCL6 HES1 APC2 SPTBN1 EFEMP1 ID2 NFE2L2 PRRX1 DOCK7 WLS RAB29 ID3 F3 EGR1 CLU EGR2 PLP1 MT1G IRF1 SOX9 ID1 MACF1 KIAA0754 APOL2 TWSG1 CDO1 SAT1 APOE DNAJB1 RAMP…	0.00258492	0.856252	7	pos
9	GO:0006954	inflammatory response	100	42	19.37	2.1e-09	CD44 TNFRSF1A CD59 HIF1A NFKBIA TIMP1 NAMPT SERPINE1 CCL2 CD81 BCL6 FN1 F3 SPP1 CLU C3 APOL2 APOE CHI3L1 ANXA1 AGT NFKBIZ OSMR SERPING1 C1R IFI16 PTX3 GPRC5B STAT3 TPST1 FOS CEBPB SAA1 LPL A2M NUPR1 JUN C1S CSF1 SOCS3 CD47 PJA2	9.2106e-06	2.1683	1	pos
5	GO:0006954	inflammatory response	125	35	19.75	4.7e-09	CD44 TNFRSF1A NFKBIA NAMPT RARRES2 CCL2 CD81 BCL6 NFE2L2 F3 CLU PLP1 APOL2 CDO1 APOE CHI3L1 ANXA1 AGT EDNRB BMPR1B NOTCH1 SERPING1 C1R IFI16 GPRC5B TPST1 FOS A2M NUPR1 JUN C1S CSF1 SOCS3 PLSCR1 TRIL	2.33637e-05	1.77215	7	pos
18	GO:0071294	cellular response to zinc ion	10	6	1.58	1.1e-06	MT1G MT1E MT1X MT1F MT1A MT1M	0.0054681	3.79747	7	pos
19	GO:0010273	detoxification of copper ion	10	6	1.58	1.1e-06	MT1G MT1E MT1X MT1F MT1A MT1M	0.0054681	3.79747	7	pos
20	GO:0006882	cellular zinc ion homeostasis	11	6	1.74	2.3e-06	MT1G MT1E MT1X MT1F MT1A MT1M	0.0114333	3.44828	7	pos
10	GO:0000398	mRNA splicing, via spliceosome	110	37	27.13	1.1e-07	KDM1A STRAP POLR2B YBX1 FUS HNRNPC HNRNPH3 HNRNPM RBFOX2 CELF4 ELAVL2 SRSF3 SFPQ RBM25 KHDRBS1 HNRNPA2B1 UPF3B SNRPD2 HNRNPR LSM7 HNRNPA1 TRA2B HNRNPD SNRPF NOVA1 SNRPG RBMX POLR2H PSIP1 HNRNPK SNRPD1 HNRNPH1 HNRNPA3 LSM3 HNRNPA0 SNRPE RBM8A	0.00054681	1.3638	12	pos
8	GO:0000398	mRNA splicing, via spliceosome	110	26	19.29	1.2e-06	RBM5 POLR2B FUS HNRNPH3 HNRNPM RBFOX2 PNN CELF4 ELAVL2 SRSF4 SFPQ KHDRBS1 HNRNPA2B1 HNRNPR HNRNPA1 DHX9 SRSF1 TRA2B HNRNPD NOVA1 RBMX SNRPD1 HNRNPH1 HNRNPA3 CSTF3 HNRNPA0	0.0059652	1.34785	9	pos
1	GO:0042407	cristae formation	16	8	1.31	5.5e-11	ATP5F1B ATP5F1A ATP5MC3 ATP5PF ATP5MC1 ATP5MG ATP5MF ATP5PO	2.73405e-07	6.10687	7	neg
2	GO:0006413	translational initiation	76	12	6.23	3.6e-10	RPL6 RPL22 RPL35 RPS2 RPL32 RPS7 RPL15 RPL35A EIF4EBP1 RPL14 RPS26 RPL12	1.78956e-06	1.92616	7	neg
3	GO:0006614	SRP-dependent cotranslational protein ta...	57	11	4.67	1.7e-09	RPL6 RPL22 RPL35 RPS2 RPL32 RPS7 RPL15 RPL35A RPL14 RPS26 RPL12	8.4507e-06	2.35546	7	neg
4	GO:0000184	nuclear-transcribed mRNA catabolic proce...	60	11	4.92	3e-09	RPL6 RPL22 RPL35 RPS2 RPL32 RPS7 RPL15 RPL35A RPL14 RPS26 RPL12	1.4913e-05	2.23577	7	neg
5	GO:0042776	mitochondrial ATP synthesis coupled prot...	10	6	0.82	3.8e-09	ATP5F1B ATP5F1A ATP5PF ATP5MG ATP5MF ATP5PO	1.88898e-05	7.31707	7	neg
6	GO:1902600	proton transmembrane transport	55	15	4.51	1.7e-06	ATP5F1B COX7A2 COX6B1 COX7C COX7B ATP5F1A ATP5MC3 ATP5PF ATP5MC1 ATP5MG COX8A NDUFA4 TMSB4X ATP5MF ATP5PO	0.0084507	3.32594	7	neg
7	GO:0002181	cytoplasmic translation	38	7	3.11	4.1e-06	RPL6 RPL32 RPL15 RPL35A EIF4EBP1 RPS26 TMA7	0.0203811	2.2508	7	neg
8	GO:0021762	substantia nigra development	27	6	2.21	4.3e-06	COX6B1 ATP5PF CALM3 CKB BASP1 CALM1 CALM3	0.0213753	2.71493	7	neg
9	GO:0099132	ATP hydrolysis coupled cation transmembr...	18	6	1.47	4.6e-06	ATP5F1B ATP5F1A ATP5MC3 ATP5MC1 ATP5MG ATP5PO	0.0228666	4.08163	7	neg
10	GO:0051170	import into nucleus	47	5	3.85	4.9e-06	SNRPD2 RAN HNRNPA1 SNRPD1 SNRPE	0.0243579	1.2987	7	neg
11	GO:0022900	electron transport chain	59	11	4.83	9.1e-06	COX7A2 COX6B1 COX7C COX7B ATP5F1A NDUFS5 CYCS UQCRH COX8A NDUFA4 NDUFA6	0.0452361	2.27743	7	neg
1	GO:0045926	negative regulation of growth	84	11	7.08	1.5e-08	MT3 IGFBP5 CDKN1A MT1G MT2A BST2 GDF15 SQSTM1 MT1X RACK1 MT1A	7.4565e-05	1.55367	8	pos
2	GO:0071456	cellular response to hypoxia	58	11	4.89	2.1e-08	MT3 PGK1 NDRG1 PTN CHCHD2 VEGFA FAM162A EPAS1 HILPDA BNIP3 CARD16	0.000104391	2.24949	8	pos
3	GO:0010273	detoxification of copper ion	10	5	0.84	2e-07	MT3 MT1G MT2A MT1X MT1A	0.0009942	5.95238	8	pos
4	GO:0071294	cellular response to zinc ion	10	5	0.84	2e-07	MT3 MT1G MT2A MT1X MT1A	0.0009942	5.95238	8	pos
5	GO:0002576	platelet degranulation	45	8	3.79	3.5e-07	CD9 TIMP1 VEGFA FN1 CD63 ALDOA TAGLN2 ANXA5	0.00173985	2.11082	8	pos
6	GO:0006882	cellular zinc ion homeostasis	11	5	0.93	3.5e-07	MT3 MT1G MT2A MT1X MT1A	0.00173985	5.37634	8	pos
7	GO:0071280	cellular response to copper ion	14	5	1.18	1.5e-06	MT3 MT1G MT2A MT1X MT1A	0.0074565	4.23729	8	pos
8	GO:0043901	negative regulation of multi-organism pr...	32	6	2.7	1.7e-06	TIMP1 BST2 SQSTM1 HTRA1 ANXA2 CARD16	0.0084507	2.22222	8	pos
9	GO:0071276	cellular response to cadmium ion	16	5	1.35	3.1e-06	MT3 MT1G MT2A MT1X MT1A	0.0154101	3.7037	8	pos
10	GO:0038084	vascular endothelial growth factor signa...	8	4	0.67	3.7e-06	DCN HSPB1 VEGFA CD63	0.0183927	5.97015	8	pos
4	GO:0043066	negative regulation of apoptotic process	245	44	38.06	1.4e-08	LTF CD74 CD44 CTNNA1 FGFR3 AARS NFKBIA HSPB1 CCL2 CRYAB SOD2 NFE2L2 DUSP1 CLU SOX9 ID1 APOE IL6ST ANXA1 TMBIM1 SPRY2 EDNRB TMBIM6 CYR61 ITPKB EGFR CAST FMN2 PINK1 SQSTM1 PDPN DDR2 PEA15 ANXA5 EFNA1 PRNP CEBPB TCIM JUN PTTG1IP SOCS3 IRS2 CARD16 DDR1	6.9594e-05	1.15607	10	pos
1	GO:0007399	nervous system development	633	92	113.94	2e-08	SOX8 FYN STMN4 VCAN MAP4 NNAT HIPK2 CTNNA2 SIRT2 MAP4K4 CRMP1 TOP2B DCX MAP2 PAFAH1B3 GNAO1 DPYSL2 RBFOX2 ARHGEF7 NDRG4 STMN2 TBCB APLP1 PTPRS NRXN2 SOX6 WASF1 DPYSL3 DBN1 FGF12 RTN4 CCDC88A TNR ID3 STMN1 PLP1 SOX4 SMARCA4 NCAN KIF3A MAP1B BCAN DCLK1 BEX1 YWHAQ KIDINS220 NREP MDM2 ITM2C BZW2 TRA2B ANP32B TUBB2B HNRNPD HES6 NFIB NCAM1 GPM6A THY1 UCHL1 ENAH CALM3 H3F3A SCRG1 NDRG2 ATCAY ZEB2 DCLK2 …	9.942e-05	0.807443	8	neg
2	GO:0007155	cell adhesion	349	33	62.82	1.9e-06	FYN VCAN CTNNA2 MAP4K4 ARHGEF7 APLP1 PTPRS CADM4 NRXN2 CORO1C PODXL2 TNR HOXA7 NCAN BCAN ATP1B1 CASK CDKN2A NCAM1 MAGI1 THY1 CLASP2 RPSA MTSS1 CADM2 RCC2 NRXN1 NTM CADM1 ABAT ADGRG1 DDR1 CD24	0.0094449	0.52531	8	neg
3	GO:0001764	neuron migration	38	9	6.84	6.2e-06	FYN TOP2B DCX MAP1B DCLK1 TUBB2B GPM6A DNER ADGRG1	0.0308202	1.31579	8	neg
36	GO:0043066	negative regulation of apoptotic process	194	39	37.59	5.9e-06	LTF CD74 CD44 MT3 HIF1A NFKBIA TIMP1 HSPB1 SERPINE1 CCL2 CRYAB SOD2 VEGFA BCL6 DUSP1 CLU SOX9 APOE LGALS3 CHL1 ANXA1 CYR61 MCL1 NTRK2 BAG3 SHC1 LMNA SQSTM1 PDPN PEA15 ANXA5 STAT3 CEBPB TCIM JUN PTTG1IP SOCS3 FLNA HSPA1A	0.0258774	1.03751	1	pos
2	GO:0045944	positive regulation of transcription by ...	247	39	43.31	1.4e-12	SOX8 DPF1 HMGB3 HIPK2 SIRT2 SOX10 SOX6 FOXM1 E2F3 PARK7 SFPQ SOX4 SMARCA4 TOP2A RAF1 BEX1 DHX9 CKAP2 ASCL1 CASK RBMX NFIB ZNF462 ATAD2 RRP1B H2AFZ HMGB2 RAD21 RBPJ ZEB2 CHD7 SMARCC1 DHX36 SOX11 TBL1XR1 ZBTB18 HMGB1 HDAC2 TCF4	6.9594e-09	0.900485	9	pos
3	GO:0000122	negative regulation of transcription by ...	200	32	35.07	1.5e-10	HIPK2 SIRT2 NSD2 CCND1 SOX6 FOXM1 E2F3 H2AFY SFPQ ARID1A HNRNPA2B1 SMARCA4 DNMT1 MDM2 ASCL1 TCF25 HES6 NFIB ARHGAP35 YEATS2 RBPJ ZEB2 INSM1 EID2 SOX11 TBL1XR1 AURKB ZBTB18 SATB1 HMGB1 HDAC2 OLIG2	7.4565e-07	0.912461	9	pos
4	GO:0008283	cell proliferation	492	64	86.28	6.5e-10	RBM5 SOX8 FYN TACC3 TNK2 HIPK2 SIRT2 TPX2 BIRC5 SOX10 RBFOX2 FERMT1 VIPR2 CCND1 FOXM1 E2F3 DBN1 CCDC88A CDC20 CENPF CCND2 KHDRBS1 CKS2 SOX4 DNMT1 RAF1 PCNA NASP CDK4 TSPAN31 MDM2 DHX9 TNS3 ASCL1 KIF2C NCAPG2 CASK NFIB CDKN2A MKI67 UCHL1 BUB1B RACGAP1 H3F3A HMGB2 MCM7 RBPJ DTYMK ZEB2 CDK1 INSM1 MARCKSL1 EID2 SOX11 ARIH2 AURKB SATB1 GNG2 HMGB1 HDAC2 ADGRG1 NME1 MALAT1 CD24	3.23115e-06	0.741771	9	pos
5	GO:0031145	anaphase-promoting complex-dependent cat...	16	9	2.81	5.7e-09	UBE2S CDC20 BUB3 BUB1B MAD2L1 PTTG1 CDK1 UBE2C AURKB	2.83347e-05	3.20285	9	pos
6	GO:0000381	regulation of alternative mRNA splicing,...	24	9	4.21	4.7e-07	RBM5 RBFOX2 CELF4 SRSF4 KHDRBS1 HNRNPA1 SRSF1 TRA2B RBMX	0.00233637	2.13777	9	pos
7	GO:0045892	negative regulation of transcription, DN...	268	46	47	1.1e-06	SOX8 DPF1 HIPK2 SIRT2 BIRC5 SOX10 RBFOX2 NSD2 CCND1 SOX6 FOXM1 E2F3 H2AFY SFPQ ARID1A CENPF SET KHDRBS1 HNRNPA2B1 SMARCA4 DNMT1 MDM2 ASCL1 TCF25 HES6 NFIB CDKN2A ATAD2 ARHGAP35 H3F3A YEATS2 HMGB2 RCOR2 RBPJ ZEB2 INSM1 EID2 BASP1 SOX11 TBL1XR1 AURKB ZBTB18 SATB1 HMGB1 HDAC2 OLIG2	0.0054681	0.978723	9	pos
17	GO:0045926	negative regulation of growth	84	22	20.81	9.9e-08	FHL1 MT3 HIF1A CRYAB BCL6 CDKN1A BBS2 MT1G MT2A BST2 GDF15 PPT1 PSRC1 AGT SERPINE2 SQSTM1 MT1E MT1X MT1F MT1M HSPA1B HSPA1A	0.000492129	1.05718	12	neg
9	GO:0030261	chromosome condensation	11	6	1.93	3e-06	ACIN1 TOP2A NUSAP1 NCAPG2 H3F3A CDK1	0.014913	3.10881	9	pos
10	GO:0007094	mitotic spindle assembly checkpoint	13	6	2.28	8.7e-06	CDC20 CENPF BUB3 BUB1B MAD2L1 AURKB	0.0432477	2.63158	9	pos
11	GO:0043044	ATP-dependent chromatin remodeling	24	11	4.21	9.3e-06	CENPM CHD4 ARID1A SMARCA4 NASP ACTL6A CENPU SMARCC1 PTMA HDAC2 CENPW	0.0462303	2.61283	9	pos
12	GO:0007166	cell surface receptor signaling pathway	705	63	123.63	9.8e-06	FYN CNTN1 POLR2B TNK2 HIPK2 IP6K2 SIRT2 BIRC5 HNRNPM SOX10 RBFOX2 DAAM1 ERH FERMT1 CELF4 ARHGEF7 VIPR2 TSPAN13 CCND1 WASF1 LMNB1 AMOTL2 FGF12 PARK7 STMN1 GRIA2 KHDRBS1 HNRNPA2B1 SOX4 SMARCA4 RAF1 CDK4 TSPAN31 HNRNPA1 ASCL1 HES6 NCAM1 ADGRL3 MAGI1 HNRNPDL DRAXIN HMGB2 RBPJ ENHO HNRNPH1 ZEB2 SMARCC1 RGMB NPPA EID2 SOX11 TBL1XR1 RCC2 NRXN1 ABAT GNG2 ISG15 DNER EVL ADGRG1 MLLT11 GPC2 CD24	0.0487158	0.509585	9	pos
13	GO:0043388	positive regulation of DNA binding	20	8	3.51	9.9e-06	HIPK2 SIRT2 PARK7 CALM3 HMGB2 ENHO HMGB1 NME1	0.0492129	2.2792	9	pos
1	GO:0071276	cellular response to cadmium ion	16	7	1.6	2.5e-09	MT3 MT1G MT2A MT1E FOS MT1X MT1M	1.24275e-05	4.375	9	neg
2	GO:0010273	detoxification of copper ion	10	6	1	3.2e-09	MT3 MT1G MT2A MT1E MT1X MT1M	1.59072e-05	6	9	neg
3	GO:0071294	cellular response to zinc ion	10	6	1	3.2e-09	MT3 MT1G MT2A MT1E MT1X MT1M	1.59072e-05	6	9	neg
4	GO:0006882	cellular zinc ion homeostasis	11	6	1.1	7.1e-09	MT3 MT1G MT2A MT1E MT1X MT1M	3.52941e-05	5.45455	9	neg
5	GO:0045926	negative regulation of growth	84	10	8.38	2.2e-08	MT3 CRYAB MT1G MT2A BST2 AGT SQSTM1 MT1E MT1X MT1M	0.000109362	1.19332	9	neg
6	GO:0002576	platelet degranulation	45	9	4.49	3.2e-08	TIMP3 TIMP1 SPARC CLU CD63 ALDOA TAGLN2 ANXA5 A2M	0.000159072	2.00445	9	neg
7	GO:0071280	cellular response to copper ion	14	6	1.4	4.4e-08	MT3 MT1G MT2A MT1E MT1X MT1M	0.000218724	4.28571	9	neg
8	GO:0010951	negative regulation of endopeptidase act...	56	10	5.58	4.1e-07	MT3 TIMP3 CST3 TIMP1 CRYAB GAPDH BST2 AGT A2M CARD16	0.00203811	1.79211	9	neg
9	GO:0032462	regulation of protein homooligomerizatio...	6	4	0.6	9.8e-07	CRYAB CLU APOE RHOC	0.00487158	6.66667	9	neg
10	GO:0043901	negative regulation of multi-organism pr...	32	7	3.19	2e-06	TIMP1 BST2 IFITM3 SQSTM1 HTRA1 ANXA2 CARD16	0.009942	2.19436	9	neg
11	GO:0043312	neutrophil degranulation	169	13	16.85	3.1e-06	FTL CST3 CTSD BST2 LGALS3 CHI3L1 CD63 ALDOA BRI3 FTH1 ANXA2 METTL7A B2M	0.0154101	0.771513	9	neg
1	GO:0007568	aging	84	18	13.05	4.1e-10	TIMP2 CTNNA1 NAMPT CRYAB SLC1A2 SOD2 NFE2L2 CANX AGT EDNRB ULK3 APP SERPING1 VCAM1 FOS PRNP JUN ATP6	2.03811e-06	1.37931	10	pos
2	GO:0002576	platelet degranulation	45	14	6.99	2.6e-09	LAMP2 ACTN1 TIMP3 SYTL4 LGALS3BP SPARC CLU APP SERPING1 TAGLN2 ANXA5 PROS1 PSAP SELENOP	1.29246e-05	2.00286	10	pos
3	GO:0030449	regulation of complement activation	9	7	1.4	8.3e-09	CD81 CLU C3 SERPING1 C1R C1S PROS1	4.12593e-05	5	10	pos
2	GO:0043312	neutrophil degranulation	148	31	28.67	3.8e-12	LAMP2 MGST1 LTF CD44 SLC2A3 CTSA CD59 FTL CST3 ALDOC PRDX6 CTSD NPC2 CYSTM1 SERPINB6 C3 LGALS3 CHI3L1 SDCBP IQGAP1 GSN ALDOA CSTB S100A11 PTX3 FABP5 CTSB ANXA2 CD47 HSPA1A B2M	1.66668e-08	1.08127	1	pos
5	GO:0071280	cellular response to copper ion	14	8	2.17	2.5e-08	MAP1LC3A MT1G APP MT1E PRNP MT1X MT1A MT1M	0.000124275	3.68664	10	pos
6	GO:0010951	negative regulation of endopeptidase act...	56	16	8.7	2.6e-08	LTF CD44 TIMP2 TIMP3 CST3 CRYAB SERPINB6 C3 AGT SORL1 APP SERPING1 CAST CSTB PROS1 CARD16	0.000129246	1.83908	10	pos
7	GO:0048146	positive regulation of fibroblast prolif...	20	9	3.11	4.8e-08	CD74 FOSL2 AGT EGFR DDR2 JUN ANXA2 S100A6 ANXA2P2	0.000238608	2.89389	10	pos
8	GO:0071276	cellular response to cadmium ion	16	8	2.49	9.9e-08	MT1G EGFR MT1E FOS JUN MT1X MT1A MT1M	0.000492129	3.21285	10	pos
9	GO:0043123	positive regulation of I-kappaB kinase/N...	43	12	6.68	1.4e-07	LTF CD74 TNFRSF1A WLS TRIM22 GJA1 RHOC PINK1 GPRC5B CXXC5 S100A13 CARD16	0.00069594	1.79641	10	pos
10	GO:0034250	positive regulation of cellular amide me...	41	8	6.37	1.5e-07	TNFRSF1A PPP1R15A NFE2L2 CLU APP CYR61 PINK1 EFNA1	0.00074565	1.25589	10	pos
11	GO:0050729	positive regulation of inflammatory resp...	23	9	3.57	2.1e-07	TNFRSF1A NFKBIA C3 IL6ST AGT APP NFKBIZ EGFR GPRC5B	0.00104391	2.52101	10	pos
12	GO:0071277	cellular response to calcium ion	19	8	2.95	5.2e-07	ADD1 FOSB IQGAP1 ITPKB CLIC4 FOS JUNB JUN	0.00258492	2.71186	10	pos
13	GO:0006958	complement activation, classical pathway	6	5	0.93	8.1e-07	CLU C3 SERPING1 C1R C1S	0.00402651	5.37634	10	pos
14	GO:0061900	glial cell activation	6	5	0.93	8.1e-07	NAMPT CLU APP EGFR JUN	0.00402651	5.37634	10	pos
15	GO:0070374	positive regulation of ERK1 and ERK2 cas...	44	11	6.83	1.6e-06	CD74 CD44 FGFR3 CCL2 CHI3L1 SPRY2 APP EGFR DDR2 JUN DDR1	0.0079536	1.61054	10	pos
2	GO:0000184	nuclear-transcribed mRNA catabolic proce...	60	27	14.8	3e-16	RPL18 RPL31 RPL6 RPL34 RPL22 RPS10 UPF3B RPL23 RPL35 RPS6 RPL11 RPL32 RPL7 RPL7A RPS3 RPL29 RPSA RPS7 RPL38 RPL15 RPL35A RPL14 RPS26 RPL12 RPL36A RBM8A RPS9	1.4913e-12	1.82432	12	pos
1	GO:0002576	platelet degranulation	45	22	11.15	4.4e-16	LAMP2 CD9 ACTN1 APLP2 TIMP3 TIMP1 LGALS3BP VEGFA SPARC FN1 CLU ACTN4 CD63 APP ALDOA TAGLN2 ANXA5 A2M FLNA PDGFA PSAP SELENOP	2.18724e-12	1.97309	12	neg
18	GO:0060602	branch elongation of an epithelium	7	5	1.09	2.7e-06	TNC FGF1 RDH10 SOX9 SPRY2	0.0134217	4.58716	10	pos
19	GO:0051591	response to cAMP	26	10	4.04	4.1e-06	EZR SPARC DUSP1 ITPR2 FOSB APP FOS JUNB JUN ZFP36L1	0.0203811	2.47525	10	pos
20	GO:0032092	positive regulation of protein binding	32	9	4.97	5.1e-06	ADD1 PPP2CB LFNG APOE APP ANXA2 ANXA2P2 SPON1 B2M	0.0253521	1.81087	10	pos
21	GO:0030593	neutrophil chemotaxis	8	5	1.24	7.1e-06	CD74 CXCL2 CCL2 THBS4 SAA1	0.0352941	4.03226	10	pos
22	GO:1902430	negative regulation of amyloid-beta form...	8	5	1.24	7.1e-06	CLU APOE SORL1 PRNP SPON1	0.0352941	4.03226	10	pos
23	GO:0010288	response to lead ion	8	5	1.24	7.1e-06	MAP1LC3A PPP2CB SPARC APP ANXA5	0.0352941	4.03226	10	pos
24	GO:0045926	negative regulation of growth	84	11	13.05	7.6e-06	FGFR3 CRYAB MT1G PSRC1 AGT GJA1 SQSTM1 MT1E MT1X MT1A MT1M	0.0377796	0.842912	10	pos
22	GO:0043065	positive regulation of apoptotic process	172	28	27.18	8.3e-06	CTNNA1 TNFRSF1A GADD45B TIMP3 CCL2 SOD2 BCL6 GADD45A ID3 F3 DUSP1 SORT1 ANXA1 AGT ITM2C BMPR1B CYR61 MCL1 RHOB NOTCH1 ADM S100B SQSTM1 PEA15 ATF3 PRNP NUPR1 JUN	0.0412593	1.03017	7	pos
26	GO:0071364	cellular response to epidermal growth fa...	13	6	2.02	7.9e-06	SOX9 ID1 IQGAP1 EGFR ZFP36L2 ZFP36L1	0.0392709	2.9703	10	pos
27	GO:0030154	cell differentiation	887	108	137.78	8e-06	TMEM176A GAS7 MGST1 LTF WWTR1 CD74 TIMP2 TNC CTNNA1 GPM6B TNFRSF1A FGFR3 ACTN1 FOSL2 BCAP29 ADCYAP1R1 SLC1A3 ADD1 NRCAM EZR GADD45B NFKBIA ITGB8 LFNG WASL CCL2 SOD2 FGF1 EFEMP1 NFE2L2 PRRX1 GBP1 ID3 CNN3 CLU RDH10 SLITRK3 MT1G SOX9 ID1 APOE MATN2 IL6ST ANXA1 ITGA7 AGT ITM2C SPRY2 EDNRB SORL1 RDX IQGAP1 COL6A1 APP CYR61 CERS2 RAB13 ITPKB NFKBIZ CXCL14 EGFR TAGLN ARID5B SLC7A11 ZFP36L2 FMN2 MMP14 T…	0.039768	0.783858	10	pos
8	GO:0030335	positive regulation of cell migration	99	33	19.18	1.1e-09	CD74 TRIP6 SEMA6A HIF1A HSPB1 SERPINE1 NEDD9 SOD2 VEGFA SPARC FN1 F3 SOX9 LGALS3 POSTN ANXA1 AGT SDCBP RDX IQGAP1 CYR61 CXCL14 RHOC MMP14 PLPP3 PDPN FAM107A STAT3 JUN CD151 CSF1 FLNA ADAM9	4.8246e-06	1.72054	1	pos
29	GO:0043312	neutrophil degranulation	169	21	26.25	9.6e-06	LAMP2 MGST1 LTF CD44 TIMP2 CTSA CST3 SERPINB6 C3 CHI3L1 TMBIM1 IQGAP1 CSTB BRI3 CTSB RAB31 ANXA2 METTL7A LAMP1 PSAP B2M	0.0477216	0.8	10	pos
30	GO:0032496	response to lipopolysaccharide	57	15	8.85	1e-05	MGST1 LTF MAOB CXCL2 NFKBIA CCL2 SPARC PLSCR4 EDNRB VCAM1 FOS JUNB CEBPB JUN CARD16	0.04971	1.69492	10	pos
1	GO:0006614	SRP-dependent cotranslational protein ta...	57	4	0.92	8e-06	RPS2 RPL32 RPL15 RPL35A	0.039768	4.34783	10	neg
2	GO:0000184	nuclear-transcribed mRNA catabolic proce...	60	4	0.97	9.8e-06	RPS2 RPL32 RPL15 RPL35A	0.0487158	4.12371	10	neg
1	GO:0006123	mitochondrial electron transport, cytoch...	6	5	0.67	8.1e-08	CYCS COX5A COX2 COX1 COX3	0.000402651	7.46269	11	pos
1	GO:0006413	translational initiation	76	15	9.03	1.1e-11	RPL31 RPL34 RPL22 RPL23 RPL35 RPS6 RPL32 RPL7A EIF4A2 RPL29 RPL15 RPL35A RPL14 RPL12 RPL36A	5.4681e-08	1.66113	11	neg
2	GO:0006614	SRP-dependent cotranslational protein ta...	57	14	6.77	1.5e-11	RPL31 RPL34 RPL22 RPL23 RPL35 RPS6 RPL32 RPL7A RPL29 RPL15 RPL35A RPL14 RPL12 RPL36A	7.4565e-08	2.06795	11	neg
3	GO:0000184	nuclear-transcribed mRNA catabolic proce...	60	14	7.13	3.2e-11	RPL31 RPL34 RPL22 RPL23 RPL35 RPS6 RPL32 RPL7A RPL29 RPL15 RPL35A RPL14 RPL12 RPL36A	1.59072e-07	1.96353	11	neg
3	GO:0030335	positive regulation of cell migration	118	22	14.82	8.1e-08	TRIP6 SEMA6A AKT2 HSPB1 SPARC TNFAIP6 PREX1 ACTN4 LGR6 POSTN APP EGFR RHOC MMP14 EMC10 CXCL16 DDR2 SMAD3 VEGFB CD151 PDGFA ADAM9	0.000402651	1.48448	3	pos
18	GO:0030335	positive regulation of cell migration	118	34	29.23	1e-07	TRIP6 HIF1A HSPB1 SOD2 VEGFA SPARC FN1 NFE2L2 F3 PREX1 SOX9 ACTN4 LGALS3 POSTN ANXA1 AGT SPRY2 SDCBP IQGAP1 APP CYR61 RHOB EGFR RHOC MMP14 PLPP3 PDPN JUN CD151 CIB1 IRS2 FLNA PDGFA ADAM9	0.0004971	1.16319	12	neg
20	GO:0008284	positive regulation of cell proliferatio...	179	39	34.68	1.8e-07	LTF WWTR1 CD74 TNC FOSL2 HIF1A TIMP1 NAMPT CD81 VEGFA BCL6 FN1 F3 EGR1 SOX9 ANXA1 AGT GLUL SDCBP CYR61 OSMR NTRK2 SHC1 ATF3 HTRA1 LTBP3 STAT3 ID4 JUN ANXA2 CSF1 S100A13 CD47 FLNA SERTAD1 NMB S100A6 HLA-E ANXA2P2	0.00078948	1.12457	1	pos
4	GO:0051301	cell division	173	42	42.67	7.4e-12	PAFAH1B1 YBX1 KIF2A SIRT2 CDC42 SEPT3 UBE2I UBE2S CCND1 STMN1 CENPF CCND2 CLTA TUBA1B CKS2 TOP2A RAN CDK4 CKAP2 DCTN3 CCNG2 NUF2 DYNC1LI1 BOD1 DYNLT1 RPS3 HMGA2 TRIM36 CALM3 CLASP2 GNL3 MAD2L1 PTTG1 CENPV TUBA1A CFL1 UBE2C RCC2 SKA2 TUBB DYNC1H1 CENPW	3.67854e-08	0.984298	12	pos
5	GO:0002181	cytoplasmic translation	38	14	9.37	8.6e-10	RPL18 RPL31 RPL6 RPL11 RPL32 RPL29 RPL38 RPL15 DHX36 RPL35A EIF4EBP1 RPS26 TMA7 RPL36A	4.27506e-06	1.49413	12	pos
6	GO:0045944	positive regulation of transcription by ...	247	46	60.93	1.4e-09	KDM1A SOX8 HMGB3 HIPK2 YBX1 SIRT2 RTRAF SMARCB1 SOX10 DLX5 FBXW7 SOX6 E2F3 PARK7 SFPQ HOXA7 SOX4 SMARCA4 TOP2A BEX1 MYCN CKAP2 HMGA1 CASK RBMX NFIB ZNF462 HMGA2 SSBP3 RRP1B GNL3 H2AFZ HMGB2 HNRNPK ZEB2 UBB CHD7 CAMTA1 SMARCC1 DHX36 SOX11 TBL1XR1 NPM1 PBX1 HDAC2 TCF4	6.9594e-06	0.754965	12	pos
7	GO:0010389	regulation of G2/M transition of mitotic...	53	19	13.07	4.6e-08	PAFAH1B1 DYNC1I2 RBX1 TUBB4A CCND1 CENPF CDK4 DCTN3 HMGA2 TUBA1A YWHAG PKIA RCC2 TUBB PBX1 TUBB4B DYNC1H1 CSNK1E YWHAE	0.000228666	1.45371	12	pos
8	GO:0006457	protein folding	82	18	20.23	5e-08	GNB1 DNAJA1 GNAO1 DNAJB11 PSMC1 BAG1 GNB4 TCP1 CCT7 DNAJB5 PFDN2 CCT5 CCT8 VCP NPPA GNG2 PFDN6 DNAJC19	0.00024855	0.889768	12	pos
9	GO:0007399	nervous system development	633	122	156.14	5.4e-08	KDM1A SOX8 PAFAH1B1 STMN4 NEDD4L NNAT HIPK2 CTNNA2 SYT1 KIF2A SIRT2 CDC42 MAP4K4 CRMP1 TOP2B DCX MAP2 PAFAH1B3 GNAO1 DPYSL2 SMARCB1 SOX10 RBFOX2 ARHGEF7 NDRG4 STMN2 TBCB APLP1 PTPRS RAB3A DLX5 MMD NRXN2 DDX6 SOX6 C12orf57 WASF1 DPYSL3 DBN1 FGF12 GNB4 RTN4 CCDC88A TNR STMN1 CENPF SOX4 RAP2A SMARCA4 NCAN KIF3A MAP1B RAN SNAP25 DCLK1 BEX1 GSTM3 YWHAQ KIDINS220 NREP MDM2 BZW2 ACTL6A TRA2B STXBP1 ANP3…	0.000268434	0.78135	12	pos
16	GO:0008284	positive regulation of cell proliferatio...	212	37	33.5	5.6e-07	WWTR1 CD74 TNC FGFR3 NAMPT CD81 LIFR BCL6 HES1 ID2 PRRX1 F3 EGR1 SOX9 ID1 ANXA1 AGT GLUL EDNRB SDCBP CYR61 NTRK2 NOTCH1 ADM S100B ATF3 LTBP3 ID4 JUN CSF1 IRS2 S100A13 SERTAD1 NMB S100A6 HLA-E AQP1	0.00278376	1.10448	7	pos
11	GO:0030154	cell differentiation	887	142	218.8	3.9e-07	KDM1A THSD7A KMT2E SOX8 PAFAH1B1 STMN4 STRAP NEDD4L NNAT HIPK2 CTNNA2 SYT1 KIF2A SIRT2 CDC42 MAP4K4 CRMP1 TOP2B DCX MAP2 GNAO1 HNRNPC DPYSL2 HNRNPH3 SMARCB1 SOX10 RBFOX2 REC8 CELF4 ARHGEF7 NDRG4 STMN2 TBCB PTPRS RAB3A DLX5 EDF1 MMD FBXW7 CCND1 DDX6 SOX6 CORO1C C12orf57 WASF1 H2AFY DPYSL3 DBN1 RTN4 CCDC88A TNR STMN1 CENPF SLIRP HOXA7 SOX4 RAP2A PPDPF GADD45G AFDN ATP5IF1 KIF3A MAP1B TOP2A RAN SNAP…	0.00193869	0.648995	12	pos
12	GO:0008150	biological_process	3139	467	774.31	5.3e-07	KDM1A RBM6 THSD7A CIAPIN1 KMT2E SOX8 PAFAH1B1 CSDE1 MAP4K5 CLDN11 STMN4 STRAP HMGB3 TMSB10 METTL1 POLR2B NEDD4L NNAT HPF1 RPL18 HIPK2 SUGP2 YBX1 CTNNA2 SYT1 IP6K2 KIF2A SIRT2 PFN2 SLC44A1 CDC42 MAP4K4 RPL31 CRMP1 ZNF638 TOP2B UBE2T DCX DYNC1I2 MAP2 GNB1 VDAC3 PAFAH1B3 ITGAE SMAP2 AKR1B1 DNAJA1 GNAO1 RTRAF PHACTR3 RPL6 FUS PCBP4 DNAJB11 SLC22A17 HNRNPC DPYSL2 HNRNPH3 ACOT7 HNRNPM RANBP1 SMARCB1 SO…	0.00263463	0.603118	12	pos
13	GO:0097711	ciliary basal body-plasma membrane docki...	29	11	7.15	1.9e-06	PAFAH1B1 DYNC1I2 TUBB4A DCTN3 TUBA1A YWHAG TUBB TUBB4B DYNC1H1 CSNK1E YWHAE	0.0094449	1.53846	12	pos
14	GO:2000300	regulation of synaptic vesicle exocytosi...	15	8	3.7	2.2e-06	SYT1 PFN2 SYP RAB3A STXBP1 CASK CALM3 NLGN1	0.0109362	2.16216	12	pos
15	GO:0051170	import into nucleus	47	13	11.59	2.6e-06	SEC61B RPL23 SNRPD2 RPAIN RAN HNRNPA1 TXN SNRPF SNRPG SNRPD1 PKIA SNRPE APOD	0.0129246	1.12166	12	pos
16	GO:0031507	heterochromatin assembly	8	6	1.97	2.8e-06	HMGA1 CDKN2A POLE3 HMGA2 H3F3A CENPV	0.0139188	3.04569	12	pos
17	GO:0006337	nucleosome disassembly	8	6	1.97	2.8e-06	SMARCB1 SET SMARCA4 HMGA1 PBRM1 SMARCC1	0.0139188	3.04569	12	pos
18	GO:1900087	positive regulation of G1/S transition o...	9	6	2.22	7.9e-06	KMT2E APEX1 CCND1 CCND2 MDM2 UBE2E2	0.0392709	2.7027	12	pos
19	GO:0034080	CENP-A containing nucleosome assembly	9	6	2.22	7.9e-06	NASP POLE3 CENPU NPM1 HIST1H4C CENPW	0.0392709	2.7027	12	pos
20	GO:0043044	ATP-dependent chromatin remodeling	24	14	5.92	8.4e-06	HNRNPC SMARCB1 SMARCA4 NASP ACTL6A POLE3 CENPU PBRM1 SMARCC1 NPM1 PTMA HDAC2 HIST1H4C CENPW	0.0417564	2.36486	12	pos
21	GO:0043388	positive regulation of DNA binding	20	10	4.93	8.8e-06	HIPK2 SIRT2 EDF1 PARK7 TXN HMGA2 CALM3 HMGB2 ENHO NME1	0.0437448	2.0284	12	pos
1	GO:0045893	positive regulation of transcription, DN...	320	37	23.63	2.6e-07	SOX8 SIRT2 MAPRE3 EBF4 SOX10 ZNF516 SFRP1 DOT1L MEIS3 LHX2 E2F3 PHF1 WWC1 SFPQ MORF4L2 USP22 MYRF HOXD9 ILF3 ARHGEF11 HMGA1 TCF7L2 MTA2 BRPF1 NSD1 APBB1 RBPJ ING2 RGMB MLXIP NR2C2 NDN PTCH1 FOXO6 LBH TRIM16 NME2	0.00129246	1.56581	2	pos
2	GO:0006508	proteolysis	405	33	29.91	1.1e-05	UBE3C FYN SIRT2 MMP2 P2RX7 MMP15 CCP110 SFRP1 CASP2 PITRM1 XPNPEP1 CUL2 BLMH UFSP2 KNG1 GIPC1 USP22 MYRF HIP1R MICAL1 BIN1 DTL GSN ENC1 PTEN BRSK2 PSMD2 PIDD1 TMEM259 PTCH1 MVB12B LRIG2 CPNE1	0.054681	1.10331	2	pos
3	GO:0019221	cytokine-mediated signaling pathway	220	50	54.5	1.5e-12	TNFRSF12A NOS2 CD44 CAMK2B KLF6 TNFRSF1A MT3 HIF1A NFKBIA TIMP1 PTPRZ1 SOD2 VEGFA HSPA9 LIFR BCL6 FN1 RHOU F3 EGR1 CDKN1A BBS2 MT2A CANX BST2 IL6ST ANXA1 IFITM3 MCL1 CAMK2D MSN GSTO1 SQSTM1 FOS JUNB ANXA2 CIB1 IRS2 IL1RAP CARD16 HLA-B HLA-C CEBPD HLA-E HLA-H PSMB8 HSPA1B HLA-A HSPA1A B2M	7.4565e-09	0.917431	12	neg
4	GO:0008360	regulation of cell shape	44	18	10.9	1e-11	EZR PTN VEGFA FN1 RHOU ANXA1 ITGA7 RHOB MYO10 GNA12 MSN ALDOA RHOC S100B PDPN DAG1 CDC42EP4 S100A13	4.971e-08	1.65138	12	neg
5	GO:0042493	response to drug	226	52	55.98	6.3e-11	NOS2 ATP1A2 TIMP2 TNC CTNNA1 ADCYAP1R1 SLC1A3 MT3 COMT LGALS1 NFKBIA PTN CRYAB SLC1A2 SPARC BCHE IGFBP2 NFE2L2 DUSP1 EGR1 CDKN1A MT2A SOX9 FOSB JUND ANXA1 AGT TMBIM6 RHOB PAM GNA12 EGFR LYPD1 TIMP4 AK4 PEA15 IGFBP7 SCN11A GPR37L1 FOS JUNB PRNP LPL BNIP3 JUN PSAP CYTB ND5 ND4 ND1 B2M ADAM9	3.13173e-07	0.928903	12	neg
6	GO:0010951	negative regulation of endopeptidase act...	56	20	13.87	3.7e-10	TFPI CD44 TIMP2 APLP2 MT3 TIMP3 CST3 TIMP1 CRYAB GAPDH VEGFA BST2 AGT SERPINE2 APP SERPINH1 TIMP4 IFI16 A2M CARD16	1.83927e-06	1.44196	12	neg
7	GO:0043312	neutrophil degranulation	169	33	41.86	4.2e-10	LAMP2 CD44 TIMP2 HEBP2 CTSA PKM RAB7A PYGB CST3 ALDOC PRDX6 CTSD NPC2 CYSTM1 BST2 LGALS3 CHI3L1 CD63 SDCBP IQGAP1 ALDOA FABP5 BRI3 CTSB RAB31 ANXA2 METTL7A LAMP1 PSAP HLA-H HSPA1B HSPA1A B2M	2.08782e-06	0.788342	12	neg
35	GO:0009617	response to bacterium	110	28	27.25	1.3e-06	TFPI NOS2 DCN TNFRSF1A CCDC80 COMT FKBP5 NFKBIA WASL SNX3 SPARC RAB29 JUND EDNRB OCIAD2 TIMP4 FOS JUNB CEBPB LPL BNIP3 PLA2G16 JUN ADGRB1 CARD16 HLA-E B2M ADAM9	0.0064623	1.02752	12	neg
13	GO:0042493	response to drug	226	30	28.38	7.3e-06	NOS2 ATP1A2 TIMP2 MT3 JAG1 PTN SLC1A2 SPARC BCHE CDKN1A MT2A SYT11 FDX1 EGFR HOMER1 AK4 SRP68 SCN11A GPR37L1 BCL2L1 VEGFB PTPN11 CALM1 CALM3 ND6 CYTB ND5 ND4 ND1 B2M ADAM9	0.0362883	1.05708	3	pos
10	GO:0071276	cellular response to cadmium ion	16	10	3.96	2.3e-09	MT3 MT1G MT2A EGFR MT1E FOS JUN MT1X MT1F MT1M	1.14333e-05	2.52525	12	neg
11	GO:0032870	cellular response to hormone stimulus	169	33	41.86	3.2e-09	TFPI ATP1A2 TNC PKM MT3 IGFBP2 NFE2L2 DUSP1 BBS2 FOSB GDF15 JUND RAMP1 LANCL2 PTPRA ANXA1 AGT RAB13 EGFR MSN LYPD1 ZFP36L2 IGFBP7 ANXA5 CTSB RAB31 AHCYL1 FOS JUNB JUN ZFP36L1 IRS2 ND3	1.59072e-05	0.788342	12	neg
12	GO:0071280	cellular response to copper ion	14	9	3.47	1.1e-08	MT3 MT1G MT2A APP MT1E PRNP MT1X MT1F MT1M	5.4681e-05	2.59366	12	neg
10	GO:0009725	response to hormone	246	33	30.89	4.6e-06	TFPI NOS2 ATP1A2 TIMP2 MT3 TIMP3 TRIB3 TIMP1 AKT2 PTN PLOD3 PRKAR1A SPARC BCHE CDKN1A GDF15 LANCL2 H3F3B PTPRA POSTN RAB13 EGFR PSPH MMP14 ANXA5 ATP6V0E2 DAG1 PTPN11 NR2F2 CALM1 CALM3 CYTB ND3 ADAM9	0.0228666	1.06831	3	pos
14	GO:0008285	negative regulation of cell proliferatio...	186	42	46.08	2e-08	CD9 TIMP2 CTNNA1 COMT SRPX NDRG1 CDK6 PTN PMP22 SOD2 SPARC BCL6 BCHE HES1 DUSP1 CDKN1A SOX9 TWSG1 APOE CD164 SERPINE2 SPRY2 ATRAID APP EMP3 TNFRSF21 LMNA AZGP1 PDPN IGFBP7 FABP7 NDRG2 NELL1 PRNP CEBPB NUPR1 JUN ADGRB1 CIB1 DDR1 HSPA1B HSPA1A	9.942e-05	0.911458	12	neg
15	GO:0061900	glial cell activation	6	6	1.49	3.7e-08	NAMPT CLU LRP1 APP EGFR JUN	0.000183927	4.02685	12	neg
16	GO:0045746	negative regulation of Notch signaling p...	9	7	2.23	6.9e-08	NFKBIA LFNG BCL6 EGFR MMP14 HEY1 TCIM	0.000342999	3.13901	12	neg
33	GO:0001666	response to hypoxia	98	28	24.28	1.1e-06	NOS2 PKM MT3 HIF1A NDRG1 PTN CHCHD2 CRYAB VEGFA FAM162A EPAS1 NFE2L2 EGR1 ACTN4 POSTN TMBIM6 PAM PLOD2 MMP14 S100B LMNA CAPN2 BNIP3 ZFP36L1 CYTB ND5 ND4 CARD16	0.0054681	1.15321	12	neg
9	GO:0009612	response to mechanical stimulus	61	23	15.11	1.8e-09	DCN ATP1A2 TNC TNFRSF1A SLC1A3 NFKBIA IGFBP2 GADD45A SOX9 FOSB JUND CHI3L1 POSTN AGT SERPINE2 EGFR PSPH MMP14 FOS JUNB DAG1 BNIP3 JUN	8.9478e-06	1.52217	12	neg
19	GO:0043065	positive regulation of apoptotic process	172	36	42.61	1.6e-07	TNFRSF12A TRIO CTNNA1 TNFRSF1A GADD45B TIMP3 RASSF2 SRPX PTN GAPDH SOD2 BCL6 FAM162A GADD45A ID3 F3 DUSP1 PREX1 ANXA1 AGT ITM2C CYR61 MCL1 RHOB CAMK2D S100B SQSTM1 PEA15 ATF3 ANXA5 STK17A PRNP NUPR1 BNIP3 JUN RPS27 RPS27L	0.00079536	0.844872	12	neg
20	GO:0043434	response to peptide hormone	113	21	27.99	1.9e-07	PKM TIMP1 SPARC NFE2L2 EGR1 GDF15 JUND PTPRA ANXA1 AGT EDNRB IQGAP1 RAB13 TIMP4 ANXA5 RAB31 AHCYL1 DAG1 ZFP36L1 IRS2 CYTB	0.00094449	0.750268	12	neg
21	GO:0051216	cartilage development	44	15	10.9	2e-07	CD44 HIF1A TIMP1 ITGB8 EFEMP1 PRRX1 BBS2 SOX9 CHI3L1 COL6A1 CYR61 SERPINH1 SCARA3 CYTL1 ANXA2	0.0009942	1.37615	12	neg
22	GO:0071294	cellular response to zinc ion	10	7	2.48	2.2e-07	MT3 MT1G MT2A MT1E MT1X MT1F MT1M	0.00109362	2.82258	12	neg
23	GO:0010273	detoxification of copper ion	10	7	2.48	2.2e-07	MT3 MT1G MT2A MT1E MT1X MT1F MT1M	0.00109362	2.82258	12	neg
24	GO:0007165	signal transduction	1223	201	302.96	2.3e-07	TNFRSF12A NOS2 CD9 DCN ATP1A2 PLEKHB1 CD44 TIMP2 TRIO CTNNA1 CAMK2B KLF6 TNFRSF1A SRI RAB7A ADCYAP1R1 APLP2 PPP1R15A TRIP6 MT3 SNX5 EZR GADD45B LGALS1 TIMP3 HIF1A NFKBIA RASSF2 SRPX TIMP1 TJP1 NDRG1 NAMPT ITGB8 PTN LFNG HSPB1 PTPRZ1 WASL RASSF4 LGALS3BP CPE CRYAB CD81 RFX4 SOD2 SNX3 VEGFA HSPA9 CDH6 LIFR BCL6 FAM162A HES1 CSPG5 EFEMP1 FN1 IGFBP2 EPAS1 NFE2L2 PRRX1 RHOU GADD45A WLS RAB29 F3 NENF D…	0.00114333	0.663454	12	neg
25	GO:0007186	G protein-coupled receptor signaling pat...	118	27	29.23	2.3e-07	TRIO ADCYAP1R1 APLP2 EZR CPE LRP1 PREX1 GNG11 APOE RAMP1 ANXA1 AGT EDNRB APP RHOB GNA12 RHOC WASF2 GPRC5B AHCYL1 GPR37L1 GNG5 GNG7 ADGRB1 FLNA NMB PSAP	0.00114333	0.923709	12	neg
26	GO:0071277	cellular response to calcium ion	19	9	4.71	3.8e-07	FOSB JUND IQGAP1 CPNE2 CAMK2D CLIC4 FOS JUNB JUN	0.00188898	1.91083	12	neg
27	GO:0043066	negative regulation of apoptotic process	245	50	60.69	3.9e-07	CD44 CTNNA1 MT3 HIF1A NFKBIA TIMP1 HSPB1 CRYAB SOD2 VEGFA HSPA9 BCL6 NFE2L2 DUSP1 CLU LRP1 CDKN1A SOX9 APOE PPT1 LGALS3 CHL1 IL6ST ANXA1 SPRY2 EDNRB TMBIM6 CYR61 MCL1 EGFR NTRK2 LMNA SQSTM1 PDPN PEA15 ANXA5 PRNP CEBPB BNIP3 TCIM JUN PTTG1IP CIB1 IRS2 FLNA CARD16 DDR1 HSPA1B HSPA1A MTRNR2L1	0.00193869	0.823859	12	neg
28	GO:0006882	cellular zinc ion homeostasis	11	7	2.72	5.7e-07	MT3 MT1G MT2A MT1E MT1X MT1F MT1M	0.00283347	2.57353	12	neg
29	GO:0030324	lung development	47	14	11.64	6.1e-07	TNC PTN VEGFA SPARC HES1 EPAS1 SOX9 CHI3L1 SPRY2 EGFR MMP14 PDPN DAG1 PDGFA	0.00303231	1.20275	12	neg
30	GO:0048146	positive regulation of fibroblast prolif...	20	9	4.95	6.6e-07	CDK6 FN1 CDKN1A AGT EGFR JUN ANXA2 PDGFA S100A6	0.00328086	1.81818	12	neg
31	GO:0051384	response to glucocorticoid	41	16	10.16	9.1e-07	SPARC BCHE IGFBP2 DUSP1 CDKN1A FOSB ANXA1 PAM EGFR ZFP36L2 S100B IGFBP7 FOS ZFP36L1 ND3 ADAM9	0.00452361	1.5748	12	neg
32	GO:1903078	positive regulation of protein localizat...	16	8	3.96	1e-06	EZR LRP1 ACSL3 LGALS3 EGFR SQSTM1 PRNP CIB1	0.004971	2.0202	12	neg
49	GO:0006979	response to oxidative stress	127	33	31.46	8.6e-06	MT3 HIF1A PON2 HSPB1 CRYAB SOD2 EPAS1 NFE2L2 PRDX6 DUSP1 APOE ANXA1 APP MCL1 RHOB EGFR MMP14 SCARA3 GPR37L1 FOS PRNP BNIP3 JUN PSAP ND5 COX1 ND3 ND1 HSPA1B HSPA1A ETV5 SELENOP ADAM9	0.0427506	1.04895	12	neg
34	GO:0051591	response to cAMP	26	10	6.44	1.3e-06	EZR SPARC DUSP1 FOSB JUND APP FOS JUNB JUN ZFP36L1	0.0064623	1.5528	12	neg
17	GO:0009611	response to wounding	165	33	26.07	6.9e-07	CD44 TNC CTNNA1 SLC1A3 SLC1A2 SPARC NFE2L2 ID3 F3 ITPR2 IRF1 MACF1 KIAA0754 APOE MATN2 ANXA1 CYR61 PTPRF NOTCH1 ADM SERPING1 SLC7A11 DST ZFP36L2 PLPP3 LAMB2 A2M JUN PLEC RGMA MAFF ZFP36L1 PLSCR1 DDR1	0.00342999	1.26582	7	pos
36	GO:0032355	response to estradiol	33	11	8.17	1.4e-06	TFPI ADCYAP1R1 PTN CRYAB IGFBP2 DUSP1 POSTN ANXA1 AGT PAM EGFR	0.0069594	1.34639	12	neg
37	GO:0030154	cell differentiation	887	164	219.73	2e-06	TMEM176A TNFRSF12A CD9 PLEKHB1 FHL1 TIMP2 TRIO TNC CTNNA1 GPM6B CAMK2B KLF6 TNFRSF1A ACTN1 BCAP29 ADCYAP1R1 SLC1A3 MT3 EZR GADD45B LGALS1 HIF1A NFKBIA RASSF2 METRN TJP1 NDRG1 CDK6 ITGB8 PTN LFNG PTPRZ1 WASL TMEM176B PMP22 ALDOC SOD2 SNX3 DNPH1 VEGFA HSPA9 BCL6 BCHE HES1 CSPG5 EFEMP1 FN1 EPAS1 NFE2L2 PRRX1 RAB29 ID3 CNN3 ALDH6A1 EGR1 CLU LRP1 PREX1 CDKN1A BBS2 MT1G SOX9 RRBP1 HSPA2 TWSG1 APOE ACTN…	0.009942	0.746371	12	neg
38	GO:0045944	positive regulation of transcription by ...	247	39	61.19	2.5e-06	DCN KLF6 TNFRSF1A MT3 HIF1A NFKBIA NAMPT CHCHD2 WASL CD81 RFX4 VEGFA HES1 EPAS1 NFE2L2 PRRX1 EGR1 SOX9 FOSB JUND NFIC APP CYR61 EGFR IER2 SQSTM1 ATF3 IFI16 HEY1 FOS CYTL1 JUNB ID4 CEBPB JUN RGMA MAFB CEBPD ETV5	0.0124275	0.637359	12	neg
39	GO:0010942	positive regulation of cell death	186	44	46.08	2.5e-06	TNFRSF12A TRIO CTNNA1 HEBP2 TNFRSF1A MT3 GADD45B TIMP3 RASSF2 SRPX PTN GAPDH SOD2 BCL6 FAM162A GADD45A ID3 F3 DUSP1 EGR1 CLU LRP1 PREX1 CDKN1A ANXA1 AGT ITM2C CYR61 MCL1 RHOB CAMK2D S100B SQSTM1 PEA15 ATF3 ANXA5 STK17A FOS PRNP NUPR1 BNIP3 JUN RPS27 RPS27L COX2	0.0124275	0.954861	12	neg
40	GO:0022617	extracellular matrix disassembly	24	10	5.95	2.6e-06	CD44 TIMP2 CST3 TIMP1 LRP1 MMP14 PDPN HTRA1 A2M DDR1	0.0129246	1.68067	12	neg
41	GO:0014002	astrocyte development	9	6	2.23	2.7e-06	MT3 CDK6 LRP1 APP EGFR LAMB2	0.0134217	2.69058	12	neg
42	GO:0034097	response to cytokine	321	75	79.52	2.7e-06	TFPI TNFRSF12A NOS2 CD44 TIMP2 CAMK2B MPC1 KLF6 TNFRSF1A MT3 TIMP3 HIF1A NFKBIA TIMP1 PTPRZ1 GAPDH SOD2 VEGFA HSPA9 SPARC LIFR BCL6 FN1 NFE2L2 RHOU F3 DUSP1 EGR1 CDKN1A BBS2 MT2A SOX9 CANX BST2 JUND CHI3L1 POSTN IL6ST ANXA1 SPRY2 IFITM3 MCL1 CAMK2D TNFRSF21 MSN GSTO1 ZFP36L2 TIMP4 ZYX SQSTM1 FOS JUNB AQP4 CEBPB JUN CDC42EP4 SHMT2 ANXA2 CIB1 ZFP36L1 IRS2 MT1X IL1RAP CARD16 HLA-B HLA-C CEBPD HLA-E …	0.0134217	0.943159	12	neg
43	GO:0043687	post-translational protein modification	119	21	29.48	3.9e-06	TNC APLP2 PSME1 LGALS1 HIF1A CST3 TIMP1 FN1 EPAS1 CALU SUMF2 APOE APP CYR61 RAB13 SPARCL1 IGFBP7 LAMB2 PSMB8 PSMB9 FAM20C	0.0193869	0.712347	12	neg
44	GO:0042177	negative regulation of protein catabolic...	55	16	13.62	4.7e-06	NOS2 TIMP2 CTSA TIMP3 CST3 TIMP1 SNX3 SERPINE2 SDCBP ATRAID EGFR TIMP4 NELL1 ADGRB1 ANXA2 FLNA	0.0233637	1.17474	12	neg
45	GO:0001525	angiogenesis	126	31	31.21	4.8e-06	TNFRSF12A DCN PKM HIF1A ITGB8 PTN HSPB1 VEGFA SPARC FN1 EPAS1 NFE2L2 F3 SAT1 RAMP1 CHI3L1 ANXA1 AGT SPRY2 CYR61 RHOB MMP14 WASF2 HEY1 CLIC4 DAG1 JUN ADGRB1 ANXA2 CIB1 PDGFA	0.0238608	0.993271	12	neg
46	GO:0050821	protein stabilization	67	15	16.6	4.8e-06	LAMP2 MT3 RASSF2 CRYAB GAPDH CLU CDKN1A ATP1B2 CCT6A PLPP3 PPIB LAMP1 FLNA HSPA1B HSPA1A	0.0238608	0.903614	12	neg
47	GO:0071407	cellular response to organic cyclic comp...	125	22	30.97	7.3e-06	TFPI ATP1A2 TNC CTNNA1 EZR LGALS1 MLC1 PTN ID3 EGR1 CLU ANXA1 APP EGFR MSN ZFP36L2 SLC16A1 CEBPB DAG1 SHMT2 ZFP36L1 ND3	0.0362883	0.710365	12	neg
48	GO:0032496	response to lipopolysaccharide	57	15	14.12	7.5e-06	TFPI NOS2 DCN COMT NFKBIA SPARC JUND EDNRB TIMP4 FOS JUNB CEBPB JUN CARD16 ADAM9	0.0372825	1.06232	12	neg
3	GO:0006614	SRP-dependent cotranslational protein ta...	57	26	14.06	7.2e-16	RPL18 RPL31 RPL6 SEC61B RPL34 RPL22 RPS10 RPL23 RPL35 RPS6 RPL11 RPL32 RPL7 RPL7A RPS3 RPL29 RPSA RPS7 RPL38 RPL15 RPL35A RPL14 RPS26 RPL12 RPL36A RPS9	3.57912e-12	1.84922	12	pos
50	GO:0007167	enzyme linked receptor protein signaling...	279	45	69.11	8.9e-06	DCN TRIO RAB7A MT3 SNX5 HIF1A RASSF2 PTN HSPB1 WASL VEGFA LIFR HES1 EFEMP1 IGFBP2 F3 EGR1 LRP1 SOX9 TWSG1 GDF15 PTPRA IL6ST CD63 AGT SPRY2 SDCBP IQGAP1 APP CYR61 EGFR NTRK2 WASF2 ZYX HTRA1 FOS GNG7 JUN RGMA IRS2 PDGFA DDR1 HSPA1A FAM20C ADAM9	0.0442419	0.651136	12	neg
51	GO:0042981	regulation of apoptotic process	399	82	98.84	8.9e-06	TNFRSF12A CD44 TRIO CTNNA1 TNFRSF1A ACTN1 MT3 GADD45B LGALS1 TIMP3 HIF1A NFKBIA RASSF2 SRPX TIMP1 NDRG1 PTN HSPB1 CRYAB GAPDH SOD2 VEGFA HSPA9 BCL6 FAM162A NFE2L2 GADD45A ID3 F3 DUSP1 EGR1 CLU LRP1 PREX1 CDKN1A SOX9 APOE ACTN4 GDF15 PPT1 LGALS3 CHL1 IL6ST ANXA1 AGT ITM2C SPRY2 EDNRB TMBIM6 CYR61 MCL1 RHOB CAMK2D EGFR NTRK2 TMEM219 S100B LMNA SQSTM1 PDPN PEA15 ATF3 ANXA5 STK17A CTSB PRNP CEBPB NUP…	0.0442419	0.829624	12	neg
1	GO:0006413	translational initiation	76	30	18.75	1.4e-16	RPL18 RPL31 RPL6 RPL34 EIF4G2 RPL22 KHDRBS1 RPS10 RPL23 RPL35 RPS6 RPL11 RPL32 RPL7 RPL7A RPS3 EIF4A2 RPL29 RPSA RPS7 RPL38 RPL15 NPM1 RPL35A EIF4EBP1 RPL14 RPS26 RPL12 RPL36A RPS9	6.9594e-13	1.6	12	pos
53	GO:0008284	positive regulation of cell proliferatio...	212	47	52.52	1e-05	TNC HIF1A TIMP1 CDK6 NAMPT PTN CD81 VEGFA LIFR BCL6 HES1 FN1 IGFBP2 PRRX1 F3 EGR1 CDKN1A SOX9 IL6ST ANXA1 AGT GLUL EDNRB SDCBP CYR61 EGFR NTRK2 S100B ATF3 HTRA1 LTBP3 RNF187 GPR37L1 ID4 GNG5 JUN SHMT2 ANXA2 CIB1 IRS2 S100A13 FLNA PDGFA NMB S100A6 HLA-E ETV5	0.04971	0.894897	12	neg
